22 **Abstract**

23 Although thrombosis has been extensively studied using various animal models, however, our  
24 understanding of the underlying mechanism remains elusive. Here, using zebrafish model, we  
25 demonstrated that *smarca5*-deficient red blood cells (RBCs) formed blood clots in the caudal vein  
26 plexus that mimics venous thrombosis. We further used the anti-thrombosis drugs to treat  
27 *smarca5*<sup>zko1049a</sup> embryos and found that a thrombin inhibitor, argatroban, partially prevented blood  
28 clot formation in *smarca5*<sup>zko1049a</sup>. To explore the regulatory mechanism of *smarca5* in RBC  
29 homeostasis, we profiled the chromatin accessibility landscape and transcriptome features in  
30 RBCs from *smarca5*<sup>zko1049a</sup> and their siblings and found that both the chromatin accessibility at the  
31 *keap1a* promoter and expression of *keap1a* were decreased. Keap1 is a suppressor protein of Nrf2,  
32 which is a major regulator of oxidative responses. We further identified that the expression of  
33 *hmox1a*, a downstream target of Keap1-Nrf2 signaling pathway, was markedly increased upon  
34 *smarca5* deletion. Importantly, overexpression of *keap1a* or knockdown of *hmox1a* partially  
35 rescued the blood clot formation, suggesting that the disrupted Keap1-Nrf2 signaling is  
36 responsible for the venous thrombosis-like phenotypes in *smarca5* mutants. Together, our study  
37 using zebrafish *smarca5* mutants not only characterizes a novel role for *smarca5* in blood clot  
38 formation, but also provides a new venous thrombosis animal model to support drug screening and  
39 pre-clinical therapeutic assessments to treat thrombosis.

40

## 41 **Introduction**

42 The erythrocytes, or red blood cells (RBCs), are highly differentiated cells produced during  
43 erythropoiesis. Mature RBCs are characterized for their abundance of hemoglobin, which can  
44 deliver oxygen to surrounding tissues. Importantly, the flexible structure of RBCs makes it  
45 capable of traveling through all blood vessels including capillaries by deformation  
46 (Rodriguez-Garcia et al., 2016). On the benefit of accumulated hemoglobin and the deformation  
47 ability, RBCs are essential for organism development by facilitating tissue oxygen delivery and  
48 transporting carbon dioxide into the respiration tissues. Moreover, RBCs participate in the  
49 maintenance of thrombosis and hemostasis (Weisel & Litvinov, 2019).

50 Epigenetic regulation of RBC-related genes is fundamental for normal development and  
51 maintenance of RBCs (Hewitt, Sanalkumar, Johnson, Keles, & Bresnick, 2014). In this process,  
52 the regulation of chromatin accessibility is a prerequisite for gene transcription and is regulated by  
53 chromatin remodelers. For instance, Brg1 could regulate  $\alpha$ - and  $\beta$ -globin gene transcription in  
54 primitive erythrocytes in mice (Bultman, Gebuhr, & Magnuson, 2005; Griffin, Brennan, &  
55 Magnuson, 2008). The nucleosome remodeling and histone deacetylase (NuRD) is identified to  
56 activate human adult-type globin gene expression (Miccio & Blobel, 2010).

57 Disorder of the gene regulation in RBCs will lead to cellular defects, thereby causing multiple  
58 diseases, such as hemoglobinopathy-induced anemia, RBC lysis-induced hemolytic anemia and  
59 thrombosis (Kato et al., 2018; Roumenina, Rayes, Lacroix-Desmazes, & Dimitrov, 2016; Weisel  
60 & Litvinov, 2019). Among them, thrombosis is a leading cause of death worldwide (Wendelboe &  
61 Raskob, 2016). In contrast to arterial thrombi, which are rich in platelets, the venous thrombi are  
62 enriched in fibrin and RBCs (Mackman, 2008; Mackman, Bergmeier, Stouffer, & Weitz, 2020).  
63 Moreover, venous thrombi can break off, travel and lodge in the lung, thereby causing pulmonary  
64 embolism (Wolberg et al., 2015).

65 Currently, the ligation-based inferior vena cava models, free radical thrombosis models and  
66 genetic knockout models are widely used in mice to study deep vein thrombosis (Diaz et al., 2019;  
67 Grover & Mackman, 2019). These disease models are generated mainly through disrupting blood  
68 flow, endothelium and blood coagulability. Taking advantage of the conserved hemostatic system  
69 and the transparency of embryos, zebrafish has been also used to generate thrombosis models. For  
70 instance, phenylhydrazine-treated zebrafish develop severe thrombosis in the caudal vein (Zhu et

71 al., 2016). Mechanistically, phenylhydrazine causes externalization of phosphatidylserine on  
72 plasma of RBC membrane and generates oxidative radicals, thereafter, resulting in the thrombosis  
73 formation. These studies in animal models shed light on the understanding and treatment of  
74 vaso-occlusion phenotype in patients with RBC defects. However, the detailed kinetics and  
75 underlying mechanism of thrombosis formation in these models are not fully explored.

76 In our previous study, genetic deletion of an epigenetic regulator-*smarca5* (*smarca5<sup>zko1049a</sup>*)  
77 resulted in abnormal chromatin accessibility, and we observed disruption of hematopoietic  
78 transcription factor binding in the genome, finally leading to defects in fetal hematopoietic stem  
79 and progenitor cells (HSPCs) (Ding et al., 2021). However, whether the other hematopoietic cell  
80 types are regulated by *smarca5* is unknown. Here, we develop a new zebrafish thrombosis model  
81 with a deletion of *smarca5*, loss of which leads to the formation of blood clots in the caudal vein  
82 plexus (CVP). We further present how exactly the change in the subcellular structure of  
83 *smarca5*-deficient RBCs occurred using transmission electron microscopy (TEM), and uncovered  
84 the disintegration of cristae in mitochondria in RBCs. To explore the regulatory mechanism of  
85 *smarca5* in RBC homeostasis, we profiled the chromatin accessibility landscape and transcriptome  
86 features by performing Assay for Transposase-Accessible Chromatin with high-throughput  
87 sequencing (ATAC-seq) and RNA sequencing (RNA-seq) analyses in RBCs from *smarca5<sup>zko1049a</sup>*  
88 and their siblings. Mechanistically, loss of *smarca5* led to the decreased chromatin accessibility at  
89 *keap1a* promoter and thus decreased transcriptional expression of *keap1a*. Keap1 is a suppressor  
90 protein of Nrf2, which regulates the expression of oxidative response genes. A downstream target  
91 of Keap1-Nrf2, *hmox1a*, showed a markedly increased expression upon *smarca5* deletion.  
92 Moreover, overexpression of *keap1a* or knockdown of *hmox1a* partially rescued the blood clot  
93 formation, supporting that the disrupted Keap1-Nrf2 signaling in *smarca5* mutants led to the blood  
94 clot formation, thereby mimicking the venous thrombosis phenotypes. Collectively, our  
95 *smarca5*-deficient zebrafish model may serve as a new venous thrombosis model for drug  
96 screening in clinical therapy.

97

## 98 **Results**

### 99 ***smarca5*-deficient RBCs tend to form aggregates in the CVP.**

100 In our previously generated *smarca5*<sup>zko1049a</sup> mutants (Ding et al., 2021), we observed that the  
101 blood clots were formed in CVP at 2 dpf, which was not present in their sibling embryos (Figure  
102 1A). Our whole mount *in situ* hybridization (WISH) data showed that *scl* was expressed in blood  
103 clots, indicating that cells in the observed blood clots were primitive RBCs in *smarca5*<sup>zko1049a</sup>  
104 (Figure 1B). To directly observe the blood clot formation in the CVP, we used the transgenic line  
105 (Tg) (*gata1:dsRed/kdr1:GFP*) to label RBCs and endothelial cells, in *smarca5*<sup>zko1049a</sup> and in  
106 siblings. Confocal imaging analysis showed that the blood clots were formed inside the blood  
107 vessels (Figure 1C). Notably, there was no difference in the distribution of myeloid cells labelled  
108 by Tg (*coro1a:GFP*) or Tg (*mpo:GFP*) in caudal hematopoietic tissue (CHT) between  
109 *smarca5*<sup>zko1049a</sup> and their siblings, and we did not observe accumulation of myeloid cells in the  
110 blood clots of *smarca5*<sup>zko1049a</sup> (supplemental Figure 1A).

111 To further determine whether *smarca5* is involved in the development of primitive hematopoiesis,  
112 we examined the expression level of *gata1* and *pu.1*, which are the erythrocyte and myeloid  
113 marker genes, respectively, in *smarca5*<sup>zko1049a</sup> and their siblings. WISH and quantitative PCR  
114 (qPCR) analyses showed that the expression level of *gata1* and *pu.1* was comparable between  
115 *smarca5*<sup>zko1049a</sup> and their siblings at 33 hours post fertilization (hpf) (Figure 1D-E and  
116 supplemental Figure 1B-C). Moreover, the expression level of *ikaros* and *scl*, which are two  
117 primitive erythrocyte markers, was normal (Figure 1D-E), as well as the expression of globin  
118 genes in *smarca5*<sup>zko1049a</sup> (Figure 1E). In addition, the myeloid markers *pu.1*, *lyz* and *mfap4* were  
119 normally expressed in *smarca5*<sup>zko1049a</sup> at 33 hpf and 2 days post fertilization (dpf) (supplemental  
120 Figure 1B-C). Thus, the early development of primitive erythrocytes and myeloid cells, is not  
121 affected upon the loss of *smarca5* in zebrafish embryos.

122 Taken together, these results show that *smarca5* is functionally required for normal behaviors of  
123 primitive erythrocytes and the blood clotting is formed by erythrocytes in *smarca5*<sup>zko1049a</sup>.

124

**Figure 1**

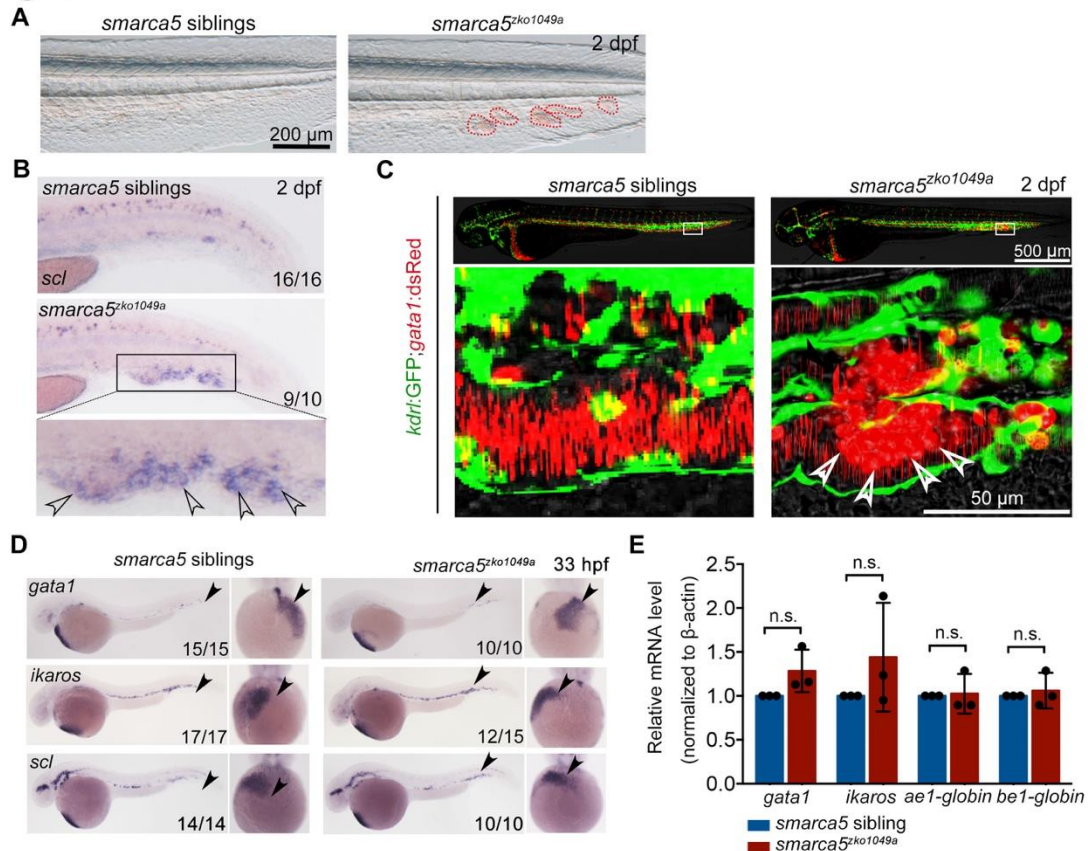

125

126 **Figure 1. Blood clots occur in *smarca5<sup>zko1049a</sup>*.** (A) The bright-field of tail region in

127 *smarca5<sup>zko1049a</sup>* and their siblings at 2 days post fertilization (dpf). The areas circled by red dotted

128 line show the blood clots in the caudal vein plexus. Scale bars, 200  $\mu$ m. (B) Expression of *scl* at 2

129 dpf in *smarca5<sup>zko1049a</sup>* and their siblings by WISH. The amplification region in the black

130 rectangular box in CHT shows the enriched expression of *scl* in blood clots (indicated by arrow

131 heads) in the caudal vein plexus. (C) The confocal imaging of transgenic line (Tg) (*kdr1:GFP;*

132 *gata1:dsRed*) in *smarca5<sup>zko1049a</sup>* and their siblings at 2 dpf. The amplification region in the white

133 rectangular box in CHT shows the coagulation of red blood cells (RBCs) (indicated by arrow

134 heads) in the caudal vein plexus. (D) Expression of *gata1*, *ikaros* and *scl* at 33 hours post

135 fertilization (hpf) in *smarca5<sup>zko1049a</sup>* and their siblings by WISH. (E) qPCR analysis showing the

136 expression of *gata1*, *ikaros*, *ae1-globin* and *be1-globin* in *smarca5<sup>zko1049a</sup>* and their siblings at 33

137 hpf. The expression level of these genes in *smarca5* siblings was set at 1. Data are mean  $\pm$  s.d. (E).

138 Asterisk presents statistical significance (n.s. not significant). *P* values were calculated by

139 two-tailed unpaired Student's *t*-test.

140

Figure S1

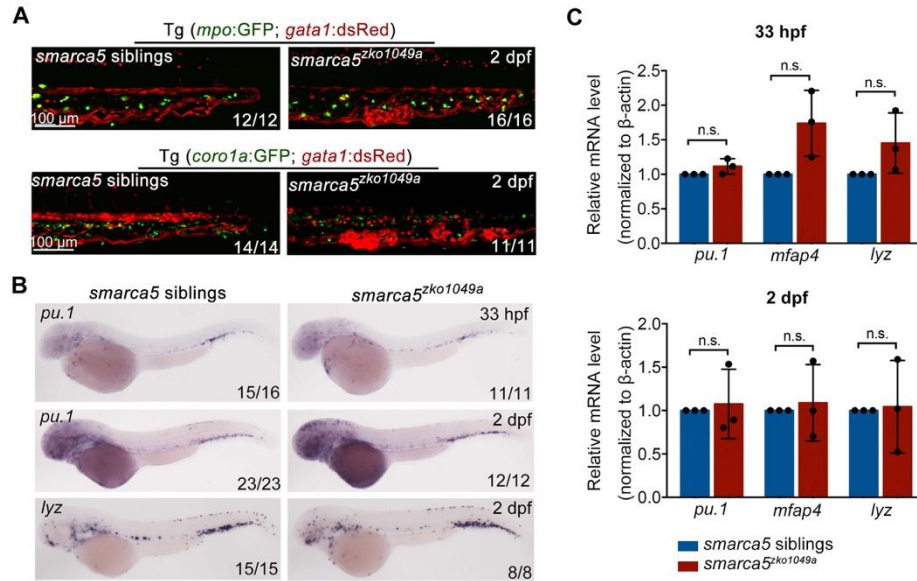

141

142 **supplemental Figure 1. *smarca5* is dispensable for the development of primitive myeloid cells.**

143 (A) The confocal imaging of Tg (*mpo:GFP; gata1:dsRed*) and Tg (*coro1a:GFP; gata1:dsRed*) in

144 *smarca5<sup>zko1049a</sup>* and their siblings at 2 dpf. (B) Expression of *pu.1* and *lyz* at 33 hpf and/or 2 dpf in

145 *smarca5<sup>zko1049a</sup>* and their siblings by WISH. (C) qPCR analysis showing the expression of *pu.1*,

146 *mfap4* and *lyz* in *smarca5<sup>zko1049a</sup>* and their siblings at 33 hpf and 2 dpf. The expression level of

147 these genes in *smarca5* siblings was set at 1. Data are mean  $\pm$  s.d. (C). Asterisk presents statistical

148 significance (n.s. not significant). *P* values were calculated by two-tailed unpaired Student's *t*-test.

149

150 **The blood clots are formed by RBC aggregation that mimics venous thrombosis.**

151 To visualize how *smarca5*-deficient RBCs formed blood clots in the CVP of *smarca5*<sup>zko1049a</sup>, we  
152 performed time lapse imaging using Tg (*gata1:dsRed*). We tracked the behavior of circulating  
153 RBCs in siblings (supplemental Movie 1) and *smarca5*<sup>zko1049a</sup> (supplemental Movie 2) from 36 hpf  
154 to 2 dpf. The results showed that *smarca5*-deficient RBCs tended to clump in the CVP at around  
155 40 hpf, after which these clots will migrate or break off under blood flow at the early stage. As the  
156 blood clots formed with larger size, these clots will finally lodge in the vein (Figure 2A and  
157 supplemental Movie 2). These results show that the clumping of RBCs precedes their  
158 sequestration in CVP, suggesting that the formation of blood clots might be independent of  
159 vascular niche.

160 To further explore whether the blood clots formed in *smarca5*<sup>zko1049a</sup> were not resulted from the  
161 abnormal niche environment, we performed parabiosis experiment using *smarca5*<sup>zko1049a</sup> and their  
162 siblings and found that the blood clots were observed in both *smarca5*<sup>zko1049a</sup> and their siblings in  
163 parabiosis pairs (Figure 2B). To label the RBCs in *smarca5*<sup>zko1049a</sup> and their siblings, the Tg  
164 (*gata1:dsRed*) or Tg (*gata1:GFP*) transgenic line was used, respectively. The results showed that  
165 *smarca5*-deficient RBCs labelled by *gata1:GFP* aggregated both in *smarca5*<sup>zko1049a</sup> and in their  
166 siblings in parabiosis pairs (Figure 2C). Although several sibling RBCs labelled by *gata1:dsRed*  
167 were found trapped in blood clots, the vast majority of *gata1:dsRed*<sup>+</sup> cells were normally  
168 circulating in blood stream both in *smarca5*<sup>zko1049a</sup> and their siblings (Figure 2C). Overall, these  
169 results indicate that the blood clots in *smarca5*<sup>zko1049a</sup> are formed largely in RBC-autonomous  
170 manner. To further explore whether thrombocytes participate in the formation of blood clots, we  
171 detected the blood clots using Tg (*CD41:GFP*). The imaging data showed that no  
172 *CD41:GFP*<sup>high</sup>-labelled thrombocytes were present in the blood clots (Figure 2D).

173 The CHT is a hematopoietic tissue critical for HSPC development. We thus wanted to know  
174 whether the blood clots formed in *smarca5*<sup>zko1049a</sup> could influence the structure of CHT, further  
175 leading to HSPC defects. As observed previously, the structure of CHT was normal in  
176 *smarca5*<sup>zko1049a</sup> and the number of *cmyb:GFP*<sup>+</sup> HSPCs in CHT at 2 dpf was comparable between  
177 *smarca5*<sup>zko1049a</sup> and their siblings (supplemental Figure 2A-B), indicating that the formation of  
178 blood clots in *smarca5*<sup>zko1049a</sup> is dispensable for HSPC development in CHT.

179 Zebrafish is a useful model to screen drugs for preclinical applications. In our *smarca5*-deficient



180 zebrafish model, we observed blood clots in veins, raising questions regarding whether there was  
181 a thrombus-like phenotype. To this end, we tried to test the clinically used anti-thrombosis drugs  
182 to treat *smarca5<sup>zko1049a</sup>* embryos. We tested reagents including heparin, aspirin and argatroban that  
183 have been reported to target thrombosis to examine whether the blood clots in *smarca5<sup>zko1049a</sup>* can  
184 be alleviated after chemical treatment. The embryos were incubated in aspirin or injected with  
185 heparin or argatroban at 36 hpf and the phenotype was examined at 2 dpf. As a result, we found  
186 that a direct thrombin inhibitor, argatroban, but not an antithrombin-dependent drug, heparin, or a  
187 platelet aggregation inhibitor, aspirin, partially prevented blood clot formation in *smarca5<sup>zko1049a</sup>* at  
188 2 dpf (Figure 2E-G). These results suggest that the RBC clots in *smarca5<sup>zko1049a</sup>* are more relevant  
189 to venous thrombosis and the *smarca5*-deficient zebrafish model may serve as a venous  
190 thrombosis model to screen drugs in preclinical setting.

191

**Figure 2**

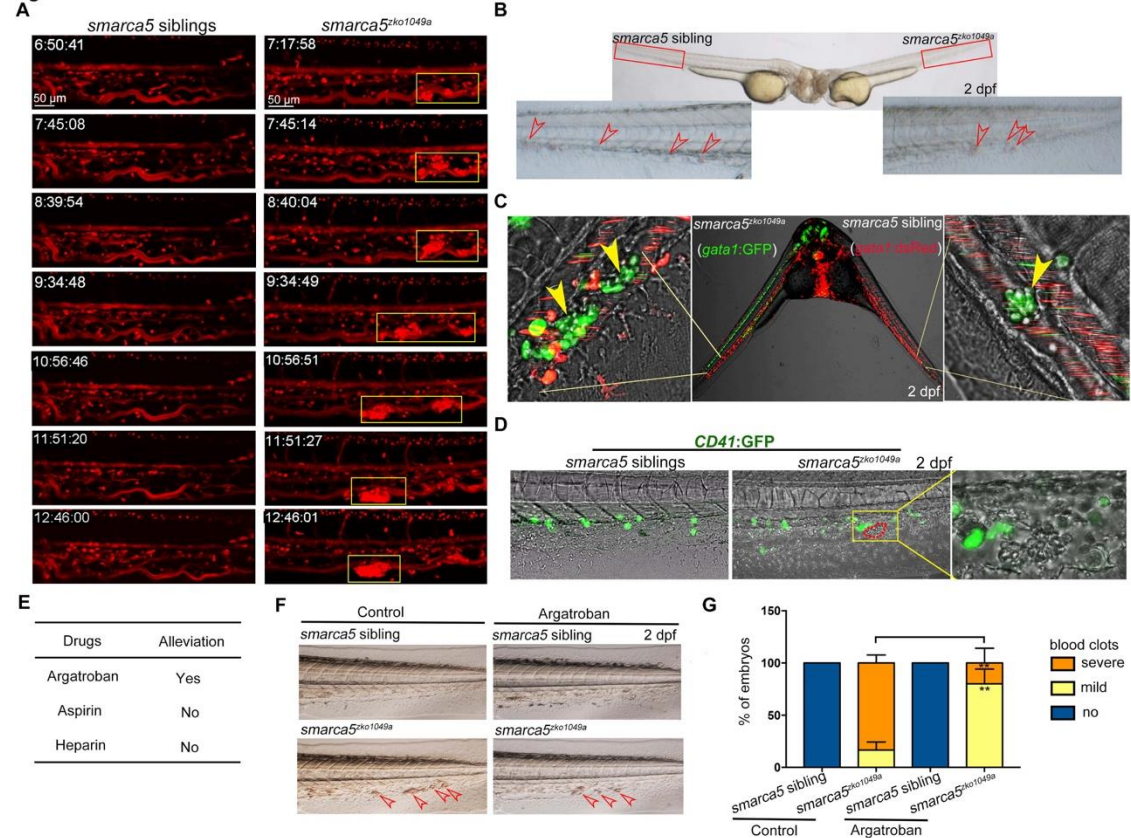

192

193 **Figure 2. The Blood clots formed by RBC aggregation mimics venous thrombosis.** (A) The  
 194 snapshot of Tg (*gatal:dsRed*) in *smarca5<sup>zko1049a</sup>* and their siblings from 36 hpf to 2 dpf. The  
 195 yellow rectangular boxes in CHT show the formed blood clots *smarca5<sup>zko1049a</sup>*. (B) The  
 196 bright-field of parabiosis at 2 dpf between *smarca5<sup>zko1049a</sup>* and their siblings. The amplification  
 197 region in the red rectangular box in CHT shows the blood clots (indicated by arrow heads) in  
 198 *smarca5<sup>zko1049a</sup>* and their siblings. (C) The confocal imaging of parabiosis generated between  
 199 *smarca5<sup>zko1049a</sup>* and their siblings with Tg (*gatal:GFP*) and Tg (*gatal:dsRed*) background,  
 200 respectively. The magnification in CHT shows the aggregation of *gatal:GFP<sup>+</sup>* cells (indicated by  
 201 arrow heads) in the caudal vein plexus. (D) The confocal imaging of Tg (*CD41:GFP*) in  
 202 *smarca5<sup>zko1049a</sup>* and their siblings at 2 dpf. The magnification in the yellow rectangular box in CHT  
 203 shows the blood clots and the distribution of *CD41:GFP<sup>+</sup>* cells. (E) Drugs used to examine  
 204 whether the blood clots in *smarca5<sup>zko1049a</sup>* can be alleviated. (F) The bright-field of tail region in  
 205 *smarca5<sup>zko1049a</sup>* at 2 dpf in control group and with argatroban treatment. The blood clots are  
 206 indicated by arrow heads. (G) The quantification of blood clots phenotype in (F). Data are mean ±  
 207 s.d. (G). Asterisk presents statistical significance (\*\**p* < 0.01). *P* values were calculated by  
 208 two-tailed unpaired Student's *t*-test.



**Figure S2**

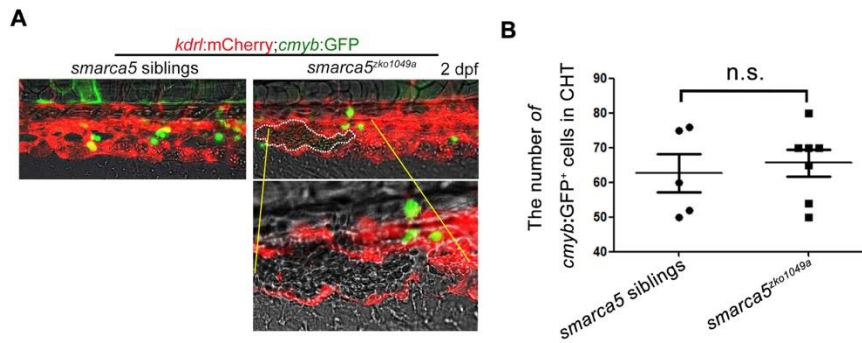

210

211 **supplemental Figure 2. The RBC aggregation has no overt influence on the number of**

212 **HSPCs in the CHT. (A) The confocal imaging of Tg (*kdr1:mCherry; cmyb:GFP*) in**

213 *smarca5<sup>ko1049a</sup>* and their siblings at 2 dpf. (B) The statistical data shows the number of *cmyb:GFP*<sup>+</sup>

214 cells in the CHT in (A). Data are mean ± s.d. (B). Asterisk presents statistical significance (n.s. not

215 significant). *P* values were calculated by two-tailed unpaired Student's *t*-test.

216

217 ***smarca5*-deficient RBCs manifest disintegration of cristae in mitochondria.**

218 Both quantitative and qualitative changes in RBCs have been linked to thrombosis (Weisel &  
219 Litvinov, 2019). To identify whether *smarca5* deletion will lead to the quantitative changes of  
220 RBCs, we performed fluorescence activating cell sorter (FACS) analysis of the percentage of  
221 *gata1:dsRed*<sup>+</sup> cells in *smarca5*<sup>zko1049a</sup> and their siblings. Deletion of *smarca5* did not lead to the  
222 significant changes in RBC counts at 2 dpf (supplemental Figure 3A-B). These data suggest that  
223 the blood clots in *smarca5*<sup>zko1049a</sup> are formed by RBC aggregation with no overt cell number  
224 change.

225 To explore whether there exist qualitative changes in *smarca5*-deficient RBCs, we performed  
226 blood-smear and Giemsa-staining analysis. The results showed that the morphology of RBCs had  
227 no obvious changes in *smarca5*<sup>zko1049a</sup> (supplemental Figure 3C). And the statistical analysis  
228 showed that the nucleocytoplasmic ratio was normal in *smarca5*-deficient RBCs (supplemental  
229 Figure 3D), indicating that the differentiation of RBCs at 2 dpf was not evidently impaired upon  
230 *smarca5* loss.

231 To further investigate the changes in subcellular structure of erythrocytes in *smarca5*<sup>zko1049a</sup>, we  
232 performed TEM analysis. Compared with *smarca5* sibling embryos in which the circulating RBCs  
233 had normal organization in mitochondria (Figure 3A-B), we found that the *smarca5*-deficient  
234 erythrocytes displayed disintegration of cristae in mitochondria while nuclear integrity was  
235 preserved in *smarca5*<sup>zko1049a</sup> (Figure 3C-E). We propose that the erythrocytes in *smarca5*<sup>zko1049a</sup>  
236 may have undergone cellular damages, such as oxidative stress, which could lead to the  
237 disintegration of mitochondria (Lewerenz, Ates, Methner, Conrad, & Maher, 2018). Thus, the  
238 morphological disruption in mitochondria suggests the disorder of cellular homeostasis in  
239 erythrocytes after *smarca5* deletion.

240

Figure 3

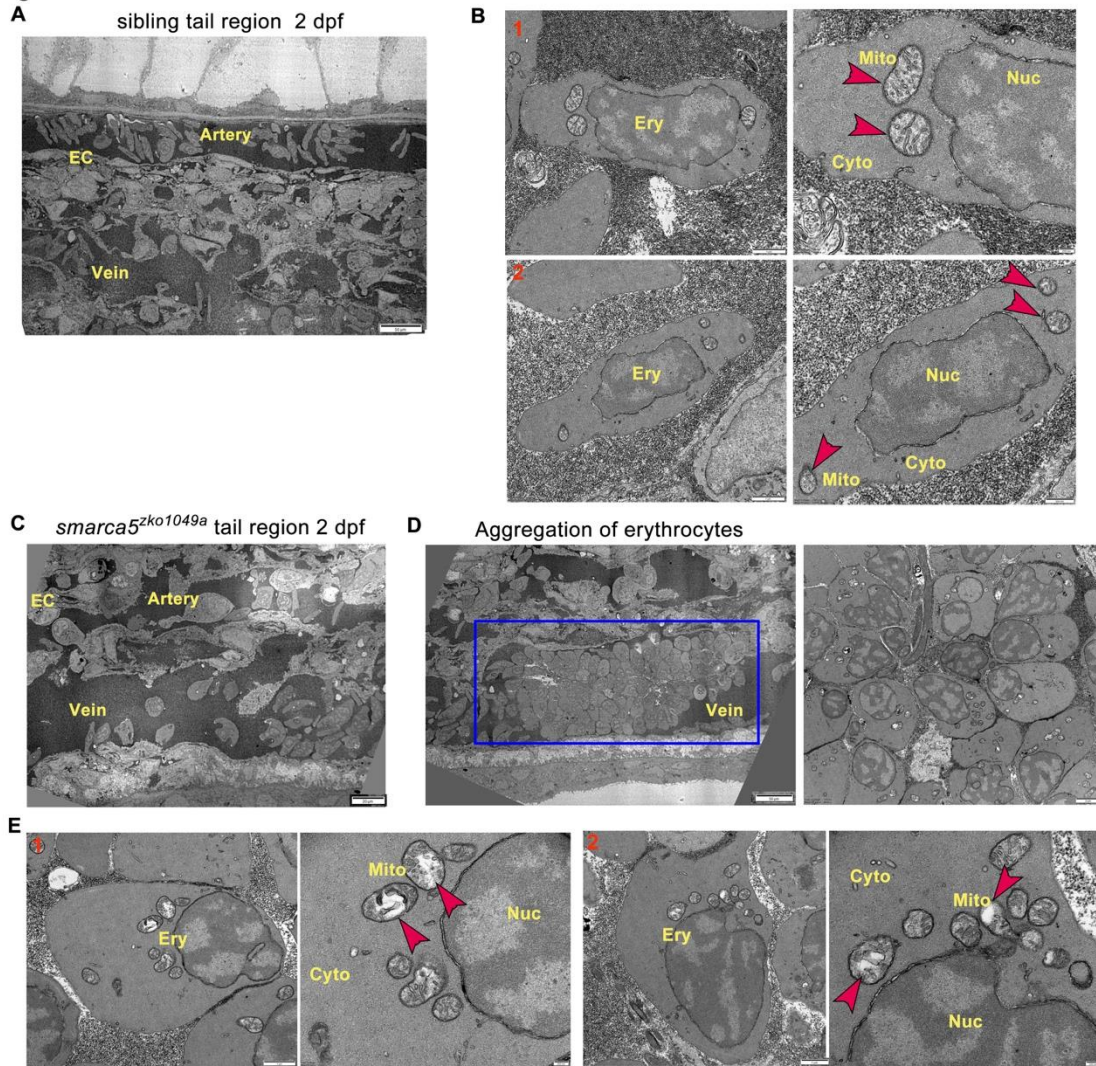

241

242 **Figure 3. TEM shows abnormal organelle morphology in *smarca5*-deficient RBCs.** (A) The  
243 transmission electron microscopy (TEM) view of a longitudinal section through the artery and  
244 vein plexus in sibling tail region at 2 dpf. (B) TEM view of erythrocytes in sibling embryos. The  
245 red arrow heads indicate the characteristic pattern of organization in mitochondria. (C) TEM view  
246 of a longitudinal section through the artery and vein plexus in *smarca5*<sup>zko1049a</sup> tail region at 2 dpf.  
247 (D) The blue rectangular box showing blood clots in the caudal vein plexus in *smarca5*<sup>zko1049a</sup>. The  
248 magnification of blood clots is shown (right). (E) TEM view of erythrocytes in *smarca5*<sup>zko1049a</sup>.  
249 The red arrow heads indicate the characteristic pattern of organization in mitochondria. The  
250 disintegration of cristae in mitochondria is observed in *smarca5*-deficient RBCs. Ery, erythrocyte;  
251 EC, endothelial cell; Mito, mitochondria; Nuc, nucleus; Cyto, cytoplasm.

252

Figure S3

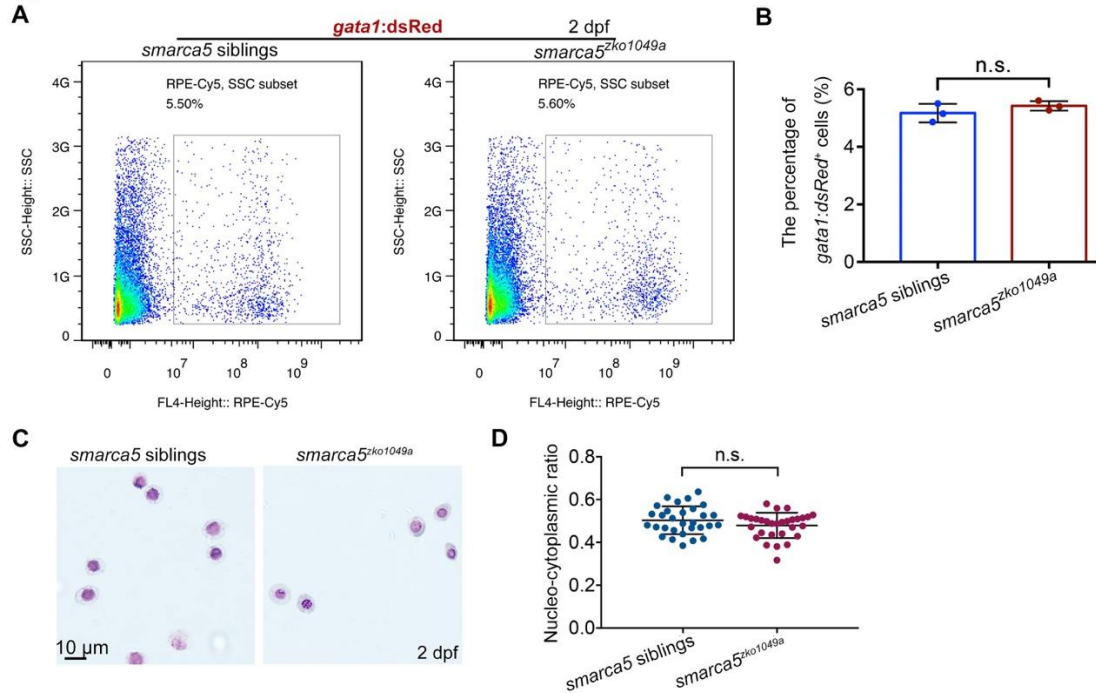

253

254 **supplemental Figure 3. The morphology and number of RBCs has no obvious change in**

255 *smarca5<sup>zko1049a</sup>*. (A) FACS of *gata1:dsRed*<sup>+</sup> cells in wild type embryos and Tg (*gata1: dsRed*) in

256 *smarca5<sup>zko1049a</sup>* and their siblings at 2 dpf. (B) The statistical data show the percentage of *gata1:*

257 *dsRed*<sup>+</sup> cells in *smarca5<sup>zko1049a</sup>* and their siblings in (A). (C) Blood-smear and Giemsa-staining

258 analysis in *smarca5<sup>zko1049a</sup>* and their siblings at 2 dpf. Scale bar, 10  $\mu$ m. (D) Scatter plots showing

259 the nucleocytoplasmic ratio in RBCs from *smarca5<sup>zko1049a</sup>* and their siblings. Data are mean  $\pm$  s.d.

260 (B and D). Asterisk presents statistical significance (n.s. not significant). *P* values were calculated

261 by two-tailed unpaired Student's *t*-test.

262

263 **Transcriptional dysregulation of genes related to erythrocyte function and homeostasis after**  
264 ***smarca5* deletion.**

265 *Smarca5* typically regulates nucleosome spacing, further affecting gene transcription (Clapier,  
266 Iwasa, Cairns, & Peterson, 2017). To decipher how loss of *Smarca5* affects the transcriptome,  
267 RNA-seq was used to profile sorted erythrocytes labelled by *gatal:dsRed* from *smarca5<sup>zko1049a</sup>*  
268 and their siblings at 2 dpf, respectively (Figure 4A). Principal components analysis (PCA)  
269 indicated clear separation of the *smarca5<sup>zko1049a</sup>* and sibling samples (supplemental Figure 4A).  
270 1,506 genes were upregulated and 633 genes were downregulated significantly (Log<sub>2</sub>(fold  
271 change) > 1, adjusted *P*-value < 0.05) in *smarca5*-deficient erythrocytes compared to erythrocytes  
272 from siblings (Figure 4B).

273 Gene set variation analysis (GSVA) revealed a strong enrichment of terms related to ‘Gatal  
274 targets’, ‘autophagy’, ‘erythrocytes take up carbon dioxide and release oxygen’ and ‘erythrocytes  
275 take up oxygen and release carbon dioxide’ in sibling erythrocytes; for *smarca5<sup>zko1049a</sup>*, while the  
276 ‘apoptosis’, ‘environmental stress response’, ‘senescence’ and ‘cell oxidation’ were markedly  
277 increased (Figure 4C). The enrichment plots showed the decreased expression of genes related to  
278 ‘erythrocyte homeostasis’ in *smarca5<sup>zko1049a</sup>*, whereas the expression of genes related to  
279 ‘inflammatory response’ was increased (Figure 4D). These results suggest that the disrupted  
280 pathways in *smarca5*-deficient RBCs were highly related to erythrocyte function and cellular  
281 homeostasis.

282 RBCs have specialized proteome, which is enriched in hemoglobin. We then focused on the  
283 expression of hemoglobin complex related genes. The expression of genes related to the  
284 hemoglobin complex, including *hbbe1.1*, *hbbe1.3*, *hbbe2*, and *hbae3*, was slightly decreased in  
285 *smarca5<sup>zko1049a</sup>* (supplemental Figure 4B). However, the level of hemoglobin detected by  
286 O-dianisidine staining was comparable between *smarca5<sup>zko1049a</sup>* and their siblings (supplemental  
287 Figure 4C). Therefore, the slightly decreased expression of hemoglobin complex related genes  
288 after *smarca5* deletion does not lead to obvious hemoglobinopathy in *smarca5<sup>zko1049a</sup>* at 2 dpf.

289 In addition, we observed the persistent expression of *spi1a*, *spi1b*, *mfap4* and *lyz* markers  
290 characteristic of myeloid cells in *smarca5*-deficient erythrocytes (supplemental Figure 4D).  
291 Perturbation of the exquisite control by *smarca5* likely causes “hybrid” primitive erythrocytes that  
292 resemble partial transcriptional properties of myeloid cells. One possible mechanism for this



293 phenotype is the regulation of SMARCA5 and CTCF at the enhancer of PU.1 (Dluhosova et al.,  
294 2014), thereby blocking of *smarca5* leads to the upregulation of *pu.1* gene expression. However,  
295 despite the inappropriate expression of myeloid genes in *smarca5*-deficient RBCs, the  
296 development of myeloid lineage was not obviously impaired in *smarca5*<sup>zko1049a</sup> manifested with  
297 normal expression pattern of *pu.1* and *lyz* at 33 hpf and 2 dpf (supplemental Figure 1A-B),  
298 suggesting the unaltered lineage choices at the primitive stage. To further explore whether the  
299 inappropriate expression of myeloid genes in *smarca5*-deficient RBCs caused RBC aggregation,  
300 we tried knockdown of *pu.1* in *smarca5*<sup>zko1049a</sup>. The results showed that knockdown of *pu.1*  
301 cannot rescue the RBC aggregation phenotype in *smarca5*<sup>zko1049a</sup> (supplemental Figure 4E-F).  
302 Taken together, *smarca5* deletion leads to the disrupted pathways related to erythrocyte function  
303 and cellular homeostasis.  
304

**Figure 4**

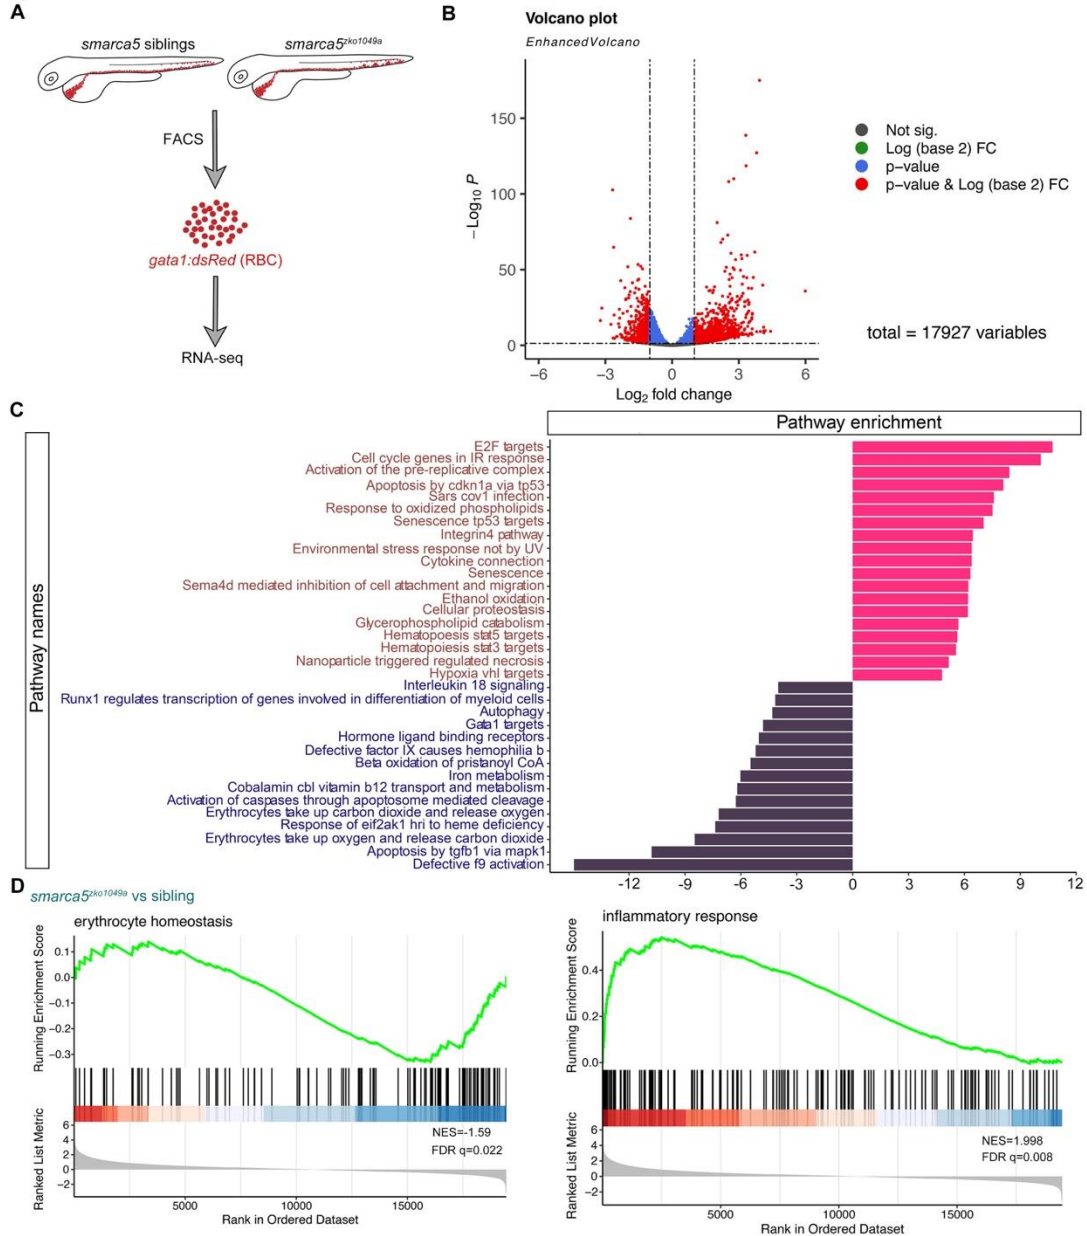

305

306 **Figure 4. Transcriptional disruption of genes related to erythrocyte function and**

307 **homeostasis after *smarca5* deletion.** (A) Schematic representation of the RBC RNA-seq

308 workflow in *smarca5<sup>ko1049a</sup>* and their siblings at 2 dpf. (B) Volcano plot showing differential

309 expression genes between RBCs from *smarca5<sup>ko1049a</sup>* and their siblings by DESeq2.  $-\log_{10} P$ ,

310 negative log10 adjusted P-value. Adjusted P-value < 0.05, log<sub>2</sub> fold change>1. (C) Differential

311 pathway enriched in RBCs from *smarca5<sup>ko1049a</sup>* and their siblings by GSVA. The x axis represents

312 the t values of GSVA scores. Two-sided unpaired limma-moderated t test. (D) Enrichment plots

313 for the top pathways in the mutant RBCs by GSEA.

314

**Figure S4**

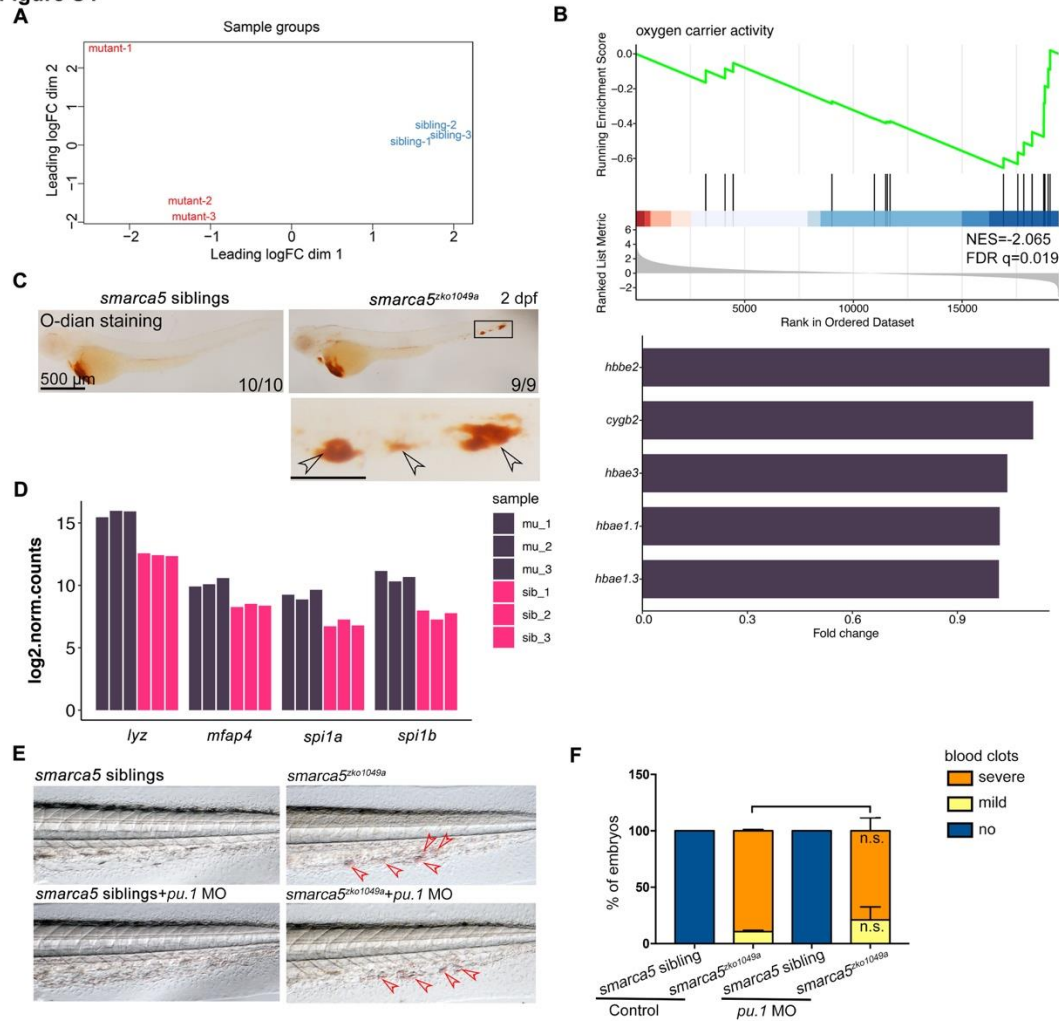

315

316 **supplemental Figure 4. RNA-seq analysis for RBCs in *smarca5<sup>zko1049a</sup>* and their siblings.** (A)

317 Principal components analysis (PCA) plot of biological replicates by the transcriptional data. (B)

318 Enrichment plot for the pathway in sibling RBCs by GSEA (top) and bar plot showing the

319 pathway specific highly expressed genes (bottom). Fold change, log<sub>2</sub> fold change. The genes are

320 sorted by the values of log<sub>2</sub> fold change. (C) O-dianisidine staining in *smarca5<sup>zko1049a</sup>* and their

321 siblings at 2 dpf. The amplification region in the black rectangular box in CHT shows the blood

322 clots (indicated by arrow heads) in *smarca5<sup>zko1049a</sup>*. (D) Bar plot showing the gene counts of *lyz*,

323 *mfap4*, *spi1a* and *spi1b* in RBCs from *smarca5<sup>zko1049a</sup>* and siblings. (E) The bright-field of tail

324 region in *smarca5<sup>zko1049a</sup>* at 2 dpf in control group and with *pu.1* MO injection. The blood clots are

325 indicated by arrow heads. (F) The quantification of blood clots in (E). Data are mean ± s.d. (F).

326 Asterisk presents statistical significance (n.s. not significant). *P* values were calculated by

327 two-tailed unpaired Student's *t*-test.



329 **Deletion of *smarca5* disrupts chromatin accessibility in RBCs.**

330 To explore the mechanism through which Smarca5 in regulating the chromatin accessibility in  
331 RBCs, we performed the ATAC-seq in FACS-purified RBCs from *smarca5*<sup>zko1049a</sup> and their  
332 siblings at 2 dpf. Density heatmaps of mapped ATAC-seq reads showed that fragments less than  
333 100 bp in length clustered immediately upstream of transcriptional start sites (TSSs) throughout  
334 the zebrafish genome in both mutant and sibling RBC nuclei (supplemental Figure 5A-B). The  
335 PCA analysis was performed for ATAC-seq samples and the results showed that the mutant  
336 samples or sibling samples can be grouped together, respectively (supplemental Figure 5C). The  
337 feature distributions of mutant-ATAC-seq peaks and sibling-ATAC-seq peaks across the genome  
338 were identified by ChIPseeker (supplemental Figure 5D).

339 We then calculated the number of genes with changes in chromatin accessibility after *smarca5*  
340 deletion (Figure 5A). The chromatin accessibility at promoters of 256 genes was decreased in  
341 *smarca5*<sup>zko1049a</sup>, while there were 439 genes with increased chromatin accessibility at promoters  
342 after *smarca5* deletion. Next, we screened the motifs enriched in sibling RBC-specific accessible  
343 chromatin regions. We found that the erythrocyte master regulator-Gata1 motif was on the top list  
344 (Figure 5B). Thus, deletion of *smarca5* might affect the binding of hematopoietic transcription  
345 factors in erythrocytes, such as Gata1. It has been reported that Smarca5 could interact with Gata1  
346 in erythrocytes (Rodriguez et al., 2005). We propose that Smarca5 might be recruited by Gata1  
347 and mediate the chromatin accessibility of Gata1 binding sites in target genes.

348 We further detected the genes in which the chromatin accessibility at promoters and their  
349 transcription were both increased or decreased after *smarca5* deletion (Figure 5C). The results  
350 showed that the chromatin accessibility and transcription of 84 genes, such as *il34*, *cox4i2*, *skap2*,  
351 *vclb*, and *acbd7*, were increased, while the chromatin accessibility and transcription of 36 genes,  
352 such as *trim2a*, *keap1a*, *skap2*, *acox3*, *igfbp1a* and *ada*, were decreased in *smarca5*-deficient  
353 RBCs (Figure 5D). Taken together, *smarca5* deletion leads to the disrupted chromatin accessibility  
354 and transcriptome in RBCs.

355

**Figure 5**

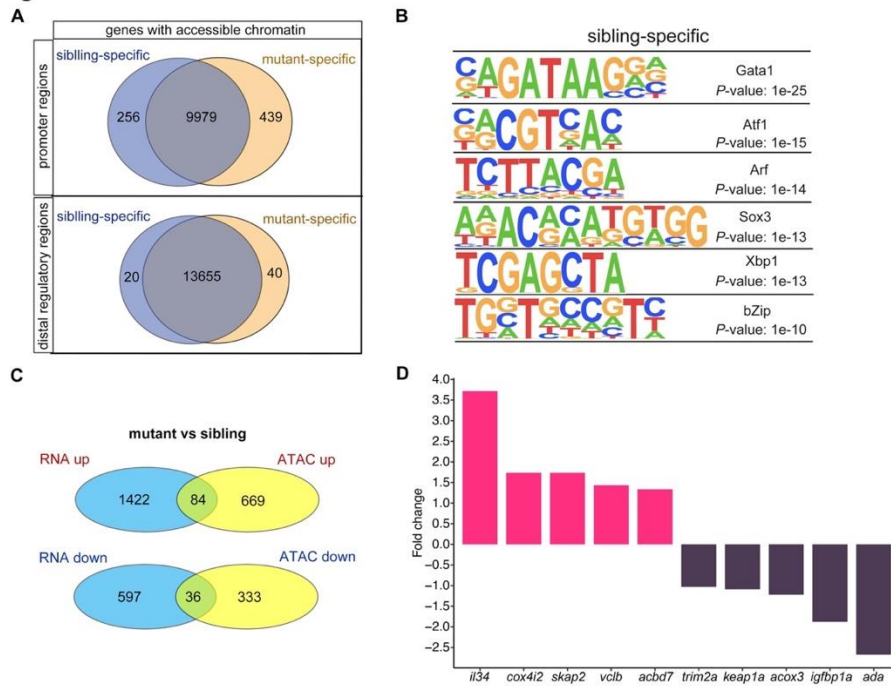

356

357 **Figure 5. Changes in chromatin accessibility in RBCs from *smarca5*<sup>-zko1049a</sup> and their siblings.**

358 (A) Venn plot showing the genes of sibling and mutant specific accessible chromatin regions at

359 promoter and distal regulator regions, respectively. (B) Motifs enriched in nucleosome free

360 regions (NFRs) with lost accessibility after *smarca5* deletion. (C) Venn plot showing the overlap

361 of genes with specific accessible chromatin regions and up-regulated expression in mutant (top)

362 and sibling (bottom) RBCs, respectively. Genes for ATAC-seq were assigned by differential

363 accessible regions. (D) Bar plot showing the selected sibling and mutant specific differential

364 expression genes. Fold change, log<sub>2</sub> fold change.

365

Figure S5

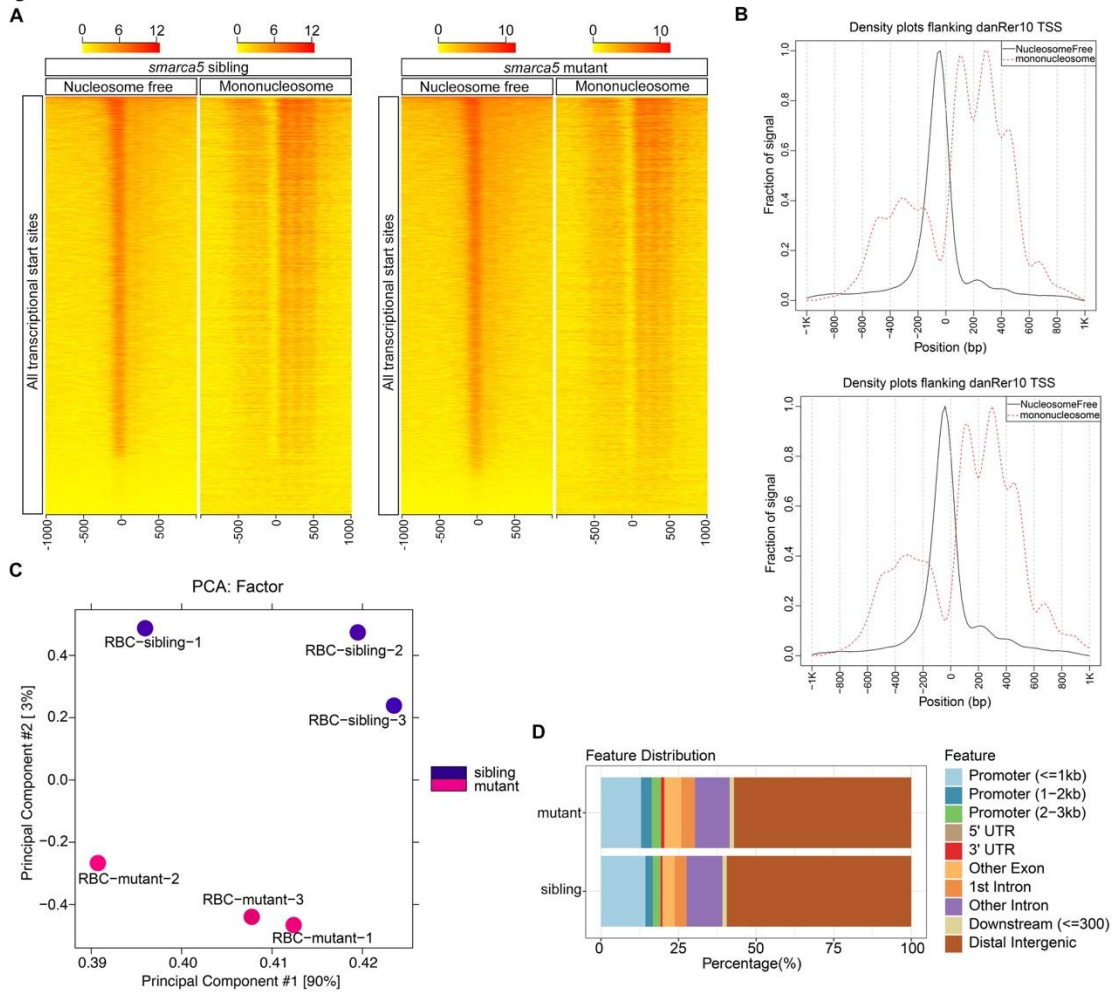

366

367 **supplemental Figure 5. ATAC-seq analysis for RBCs in *smarca5*<sup>zko1049a</sup> and their siblings.** (A)

368 Heatmaps showing density of mapped ATAC-seq reads from single biological replicates 1 kb up  
 369 and downstream of transcriptional start sites (TSS) in *danRer10*. Separate heatmaps for fragments  
 370 of nucleosome free (less than 100 bp) and mononucleosome (between 180 and 247 bp) are shown.

371 (B) Density plots flanking *danRer10* TSS from sibling and mutant RBCs for mapped reads shown  
 372 in (A). (C) PCA plot of biological replicates using all ATAC-seq peaks. (D) Bar plot drew by

373 ChIPseeker showing the feature distributions of mutant-ATAC-seq peaks and sibling-ATAC-seq  
 374 peaks across the genome.

375

376 ***keap1a* acts as a downstream target of Smarca5 in RBC aggregation.**

377 Based on the screening results, the chromatin accessibility at *keap1a* promoters, which contains  
378 Gata1 motif, was decreased in *smarca5*<sup>zko1049a</sup> (Figure 6A). The transcription level of *keap1a*  
379 detected by qPCR was also decreased in *smarca5*-deficient RBCs (Figure 6B). Given that *keap1*  
380 was previously identified to correlate with human venous thrombosis (Akin-Bali, Eroglu, Ilk, Egin,  
381 & Kankilic, 2020), we propose that *keap1a* may act as a downstream target of Smarca5 in RBCs.

382 Keap1-Nrf2 system is an evolutionarily conserved defense mechanism in oxidative stress (Itoh et  
383 al., 1997; Itoh et al., 1999). In cytoplasm, Keap1 could anchor to Nrf2 to facilitate the Nrf2  
384 degradation, while oxidative stress leads to the proteasomal degradation of Keap1 and release of  
385 Nrf2 to the nucleus, thereafter activate the expression of oxidation defense factors. Both our  
386 RNA-seq and qPCR analysis showed the downregulation of *keap1a* and as a downstream target of  
387 Nrf2, *hmox1a* showed a markedly increase in gene expression upon *smarca5* deletion (Figure 6C),  
388 suggesting the disruption of Keap1-Nrf2 signaling pathway. It is worthy of note that, although the  
389 upregulated expression of Keap1-Nrf2 downstream targets can protect cells from oxidative  
390 damage, the excessive activation of *hmox1a*, which catalyzes the degradation of heme to  
391 biliverdin, carbon monoxide, and Fe<sup>2+</sup>, could even lead to the oxidative stress (Hassannia,  
392 Vandenabeele, & Vanden Berghe, 2019). Thus, we propose that the unbalanced Keap1-Nrf2  
393 signaling, especially the upregulation of *hmox1a*, could increase oxidative damage in  
394 *smarca5*-deficient RBCs. We next performed functional validation of *keap1a* in *smarca5*<sup>zko1049a</sup> by  
395 overexpression of *hsp70:keap1a*-EGFP. Heat shock was performed at 24 hpf and 36 hpf, and the  
396 phenotype was examined at 2 dpf. The results showed that overexpression of *keap1a* in  
397 *smarca5*<sup>zko1049a</sup> could partially rescue the blood clots phenotype (Figure 6D-E). In addition,  
398 knockdown of *hmox1a*, the downstream target of Keap1-Nrf2, can also partially rescue the blood  
399 clots phenotype in *smarca5*<sup>zko1049a</sup> (Figure 6F-G), further supporting that the Keap1-Nrf2 signaling  
400 pathway downstream of Smarca5 is essential for blood clot formation.

401 To further identify the conserved role of *SMARCA5* in mammalian erythrocyte homeostasis, we  
402 used K562 cells (human erythroleukemic cells) to perform further analysis. Treatment of hemin  
403 induced the hemoglobinization of most K562 cells, suggesting the efficient erythroid  
404 differentiation (supplemental Figure 6A-B). We then knocked down *SMARCA5* in hemin-induced  
405 K562 cells using *SMARCA5* short interfering RNA (siRNA) and the qPCR and western blot



406 analyses showed that both the RNA and protein levels of *SMARCA5* were decreased significantly  
407 after si*SMARCA5*s (si*SMARCA5*-1, si*SMARCA5*-2 and si*SMARCA5*-3) transfection (supplemental  
408 Figure 6C-D). In addition, the expression of *HMOX1* was obviously upregulated after *SMARCA5*  
409 knockdown (supplemental Figure 6E), indicating the conserved role of *SMARCA5* in human  
410 erythrocyte homeostasis.

411 Considering the role of Keap1-Nrf2 signaling pathway in oxidative stress regulation, we further  
412 asked whether the oxidative stress could be a trigger for blood clot formation in *smarca5* mutants.  
413 Then, we used a free radical scavenger glutathione to determine the mechanisms of  
414 *smarca5*-deficiency induced blood clots. We found that glutathione obviously prevented  
415 thrombosis in *smarca5*<sup>zko1049a</sup> (supplemental Figure 7A-B), implying that free radical generation  
416 may play an important role in thrombosis in *smarca5*<sup>zko1049a</sup>.

417 Taken together, loss of *smarca5* leads to the disruption of *keap1a* expression and excessive  
418 activation of *hmox1a* in *smarca5*<sup>zko1049a</sup>, which together contribute to the formation of blood clots.

419

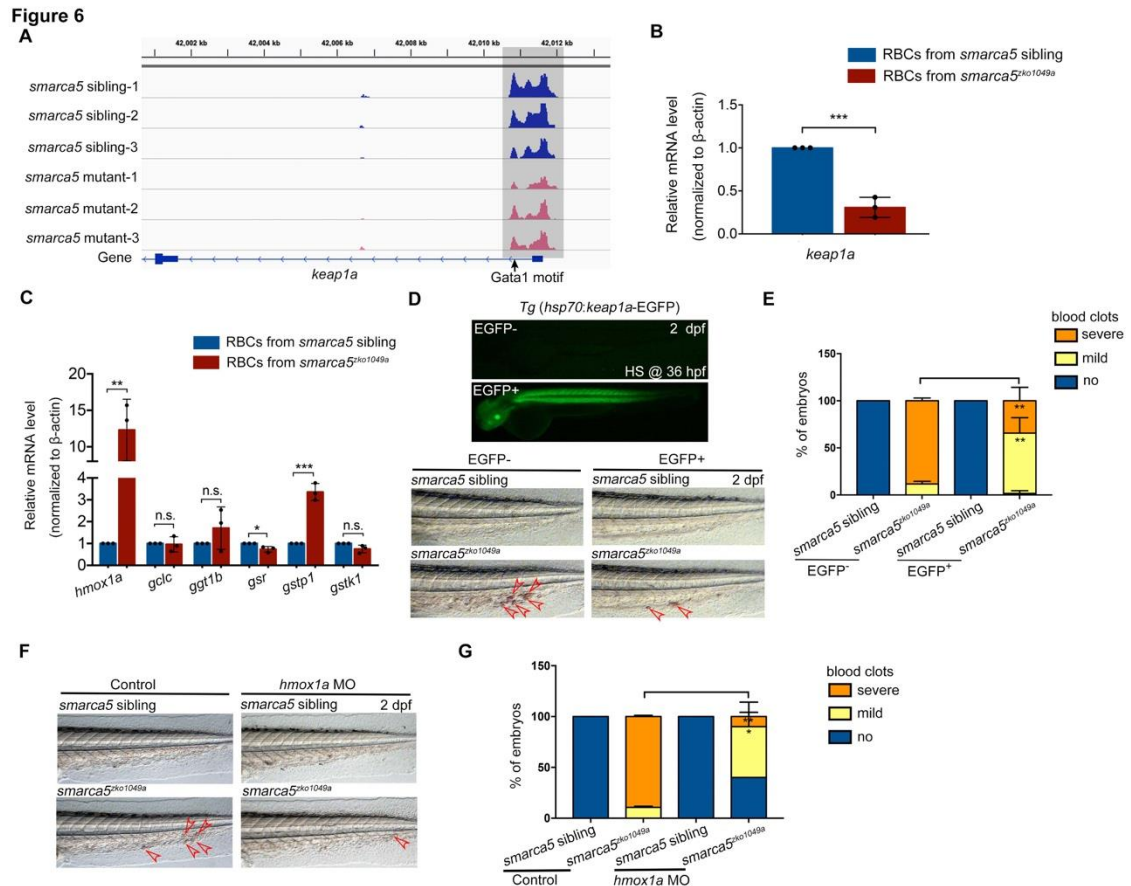

420

421 **Figure 6. Keap1- Nrf2 signaling pathway acts at downstream of Smarca5 in regulating RBC**

422 **aggregation.** (A) The browser views showing the ATAC-seq peaks in *keep1a* promoter with in

423 *smarca5<sup>zko1049a</sup>* and their siblings. Gray box indicates the change of ATAC-seq peaks after *smarca5*

424 deletion. The location of Gata1 motif at *keep1a* promoter is indicated by arrow. (B) qPCR analysis

425 showing the expression of *keep1a* in RBCs from *smarca5<sup>zko1049a</sup>* and their siblings at 2 dpf. (C)

426 qPCR analysis showing the expression of *hmox1a*, *gclc*, *ggt1b*, *gsr*, *gstp1* and *gstk1* in RBCs from

427 *smarca5<sup>zko1049a</sup>* and their siblings at 2 dpf. (D) The imaging of EGFP fluorescence in Tg

428 (*hsp70:keep1a-EGFP*) embryos at 2 dpf. Heat shock was performed at 36 hpf. The bright-field of

429 tail region in *smarca5<sup>zko1049a</sup>* and their siblings, with or without Smarca5 overexpression at 2 dpf.

430 (E) The quantification of blood clots phenotype in (D). (F) The bright-field of tail region in

431 *smarca5<sup>zko1049a</sup>* and their siblings, in control group and with *hmox1a* MO injection. The blood clots

432 are indicated by arrow heads. (G) The quantification of blood clots phenotype in (F). Data are

433 mean  $\pm$  s.d. (B, C, E, G). Asterisk presents statistical significance (\* $p < 0.05$ , \*\* $p < 0.01$ , \*\*\* $p <$

434 0.001, n.s. not significant). *P* values were calculated by two-tailed unpaired Student's *t*-test.

435

Figure S6

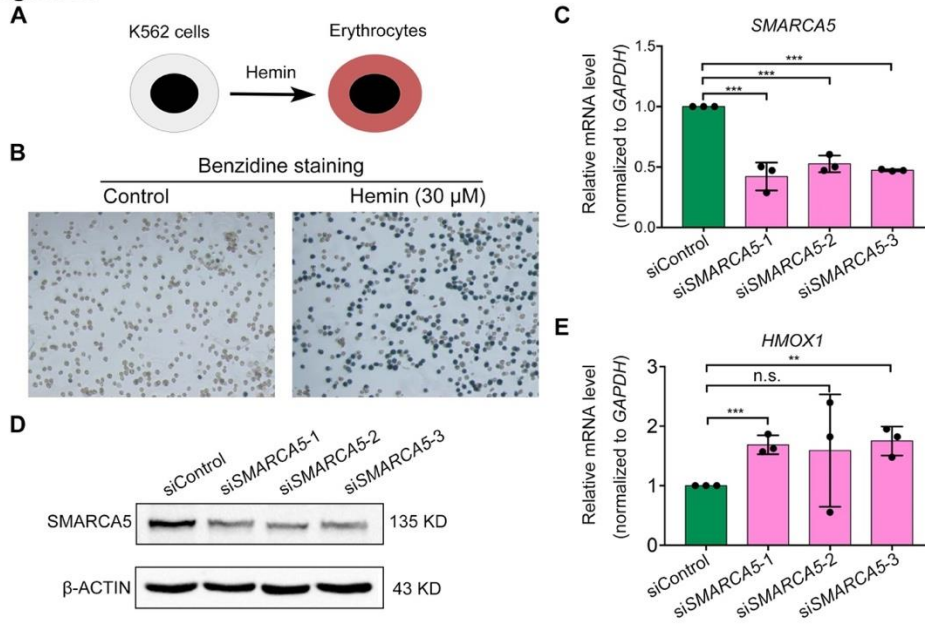

436

437 **supplemental Figure 6. The upregulation of *HMOX1* in hemin-induced K562 cells after**

438 **knockdown of *SMARCA5*.** (A) Schematic representation the induction of erythroid

439 differentiation of K562 cells using hemin. (B) Benzidine staining of K562 cells in control group

440 and with hemin treatment. (C) qPCR analysis showing the expression of *SMARCA5* in control

441 (siControl) and after *SMARCA5* knockdown (siSMARCA5-1, siSMARCA5-2, siSMARCA5-3). The

442 expression level of *SMARCA5* was normalized to *GAPDH*. (D) Western blot showing the protein

443 level of *SMARCA5* in control and after *SMARCA5* knockdown. (E) qPCR analysis showing the

444 expression of *HMOX1* in control and after *SMARCA5* knockdown. The expression level of

445 *HMOX1* was normalized to *GAPDH*. Data are mean  $\pm$  s.d. (C and E). Asterisk presents statistical

446 significance (\*\* $p < 0.01$ , \*\*\* $p < 0.001$ , n.s. not significant). *P* values were calculated by two-tailed

447 unpaired Student's *t*-test.

448

**Figure S7**

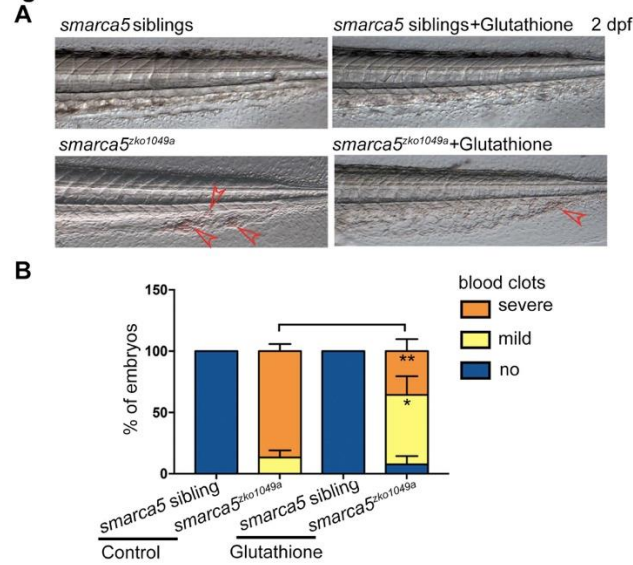

449

450 **supplemental Figure 7. The free radical generation may play a major role in RBC**

451 **aggregation in *smarca5<sup>zko1049a</sup>*.** (A) The bright-field of tail region in *smarca5<sup>zko1049a</sup>* at 2 dpf in

452 control group and with glutathione treatment. The blood clots are indicated by arrow heads. (B)

453 The quantification of blood clots phenotype in (A). Data are mean  $\pm$  s.d. (B). Asterisk presents

454 statistical significance ( $*p < 0.05$ ,  $**p < 0.01$ ). *P* values were calculated by two-tailed unpaired

455 Student's *t*-test.

456

## 457 **Discussion**

458 In this work, we develop a zebrafish thrombosis model with a deletion of an epigenetic  
459 regulator-*smarca5*. The blood clots are formed in the CVP of *smarca5*<sup>zko1049a</sup> and the erythrocytes  
460 manifest disintegration of cristae in mitochondria. Further transcriptome and chromatin  
461 accessibility analysis show that *keap1a* acts as a downstream target of Smarca5. Moreover, the  
462 elevated expression of the downstream target of Keap1-Nrf2, *hmox1a*, leads to the aggregation of  
463 *smarca5*-deficient RBCs. Together, these results demonstrate the protective role of Smarca5 in  
464 regulating erythrocyte homeostasis and that the *smarca5* loss-of-function zebrafish mutant may  
465 serve as a new thrombosis model to screen molecular drugs for clinical therapy.

466 Considering the conserved coagulation and anticoagulation signaling pathway, the zebrafish  
467 model has been used to study the physiology of thrombosis (Hanumanthaiah, Day, &  
468 Jagadeeswaran, 2002; Jagadeeswaran, Sheehan, Craig, & Troyer, 1999; Sheehan et al., 2001). The  
469 ferric chloride and laser injury methods are widely used in zebrafish to generate thrombus in the  
470 circulation (M. Gregory, Hanumanthaiah, & Jagadeeswaran, 2002). Phenylhydrazine-treated  
471 zebrafish also develop thrombosis in the caudal vein (Zhu et al., 2016). Moreover, zebrafish is an  
472 ideal model to explore novel players in thrombosis based on genetic manipulation. For example,  
473 mutation of *anti-thrombin III* gene in zebrafish can mimic disseminate intravascular coagulation  
474 (Liu et al., 2014). miR-126 was identified as a regulator of thrombi generation in zebrafish  
475 (Zapilko et al., 2020). Importantly, the transparency of zebrafish embryo makes it feasible to  
476 image the kinetics of thrombus formation. In our study, the *gata1*:dsRed labelled RBCs were  
477 imaged during blood clot formation. Thus, the zebrafish thrombosis model is a great asset for  
478 exploring the underlying mechanisms in thrombosis formation.

479 Unlike Brg1, which is essential for mouse erythrocyte development by regulating globin gene  
480 expression (Bultman et al., 2005; Griffin et al., 2008), Smarca5 is required for primitive  
481 erythrocyte homeostasis at the erythrocyte differentiation stage. Deletion of *smarca5* does not lead  
482 to the gross changes in RBC morphology and viability, but specifically results in the RBC  
483 aggregation phenotype. The mechanistic details for different chromatin remodelers functioning in  
484 the different processes during erythropoiesis warrant further investigation.

485 Previous evidence suggests that chromatin remodeler NuRD is required to maintain lineage  
486 fidelity during erythroid-megakaryocyte ontogeny (Gao et al., 2010; G. D. Gregory et al., 2010).

487 Our results show that, despite the normal lineage choice for primitive erythrocytes in  
488 *smarca5*<sup>zko1049a</sup>, the aberrant activation of myeloid genes occurred in RBCs after *smarca5* deletion.

489 The exquisite cell lineage control by *smarca5* may be due to the regulation of SMARCA5 at the  
490 enhancer of PU.1 (Dluhosova et al., 2014).

491 Besides the conserved role of Keap1-Nrf2 system in oxidative stress, Keap1-Nrf2 is also  
492 demonstrated to act as a regulator in cell development and differentiation across multiple tissues  
493 and cell types. For instance, Keap1-Nrf2 signaling pathway is indispensable for hematopoietic  
494 stem cell (HSC) lineage commitment in mice (Murakami, Shimizu, Romeo, Yamamoto, &  
495 Motohashi, 2014). Knockout of *Keap1* in HSCs showed enhanced granulocyte-monocyte  
496 differentiation ability at the expense of lymphoid and erythrocyte differentiation. And the  
497 expression level of erythrocyte and lymphoid genes was decreased in *Keap1*-deficient HSCs.

498 Importantly, the abundance of *Hmox1* is upregulated during erythrocyte differentiation, and  
499 *Hmox1* expression must be tightly regulated at appropriate level for efficient erythropoiesis  
500 (Garcia-Santos et al., 2014). Overexpression of *Hmox1* impairs hemoglobin synthesis, while lack  
501 of *Hmox1* leads to the enhancement of hemoglobinization. Here, we show that the disruption of  
502 *keap1a* expression and excessive activation of *hmox1a* in *smarca5*<sup>zko1049a</sup> contribute to RBC  
503 aggregation. Besides the free radical generation, which may play an important role in RBC  
504 aggregation in *smarca5*<sup>zko1049a</sup>, we cannot rule out other possibilities that maybe also involved in  
505 the observed phenotype, such as the regulation of Keap1-Nrf2 signaling pathway in erythrocyte  
506 gene expression.

507 In summary, we have demonstrated, for the first time, that deletion of *smarca5* in zebrafish leads  
508 to the formation of blood clots that mimics venous thrombosis by regulating the Keap1-Nrf2  
509 signaling pathway in RBCs. These findings raise the possibility that zebrafish *smarca5* mutant  
510 may serve as a new venous thrombosis model for drug screening and pre-clinical therapeutic  
511 assessment.

512

513 **Methods**

514 **Zebrafish strains**

515 Zebrafish strains including Tubingen, Tg (*CD41:GFP*) (Lin et al., 2005), Tg (*gata1:dsRed*)  
516 (Traver et al., 2003), Tg (*kdr1:mCherry*) (Bertrand et al., 2010), Tg (*mpo:GFP*) (Renshaw et al.,  
517 2006), Tg (*coro1a:GFP*) (L. Li, Yan, Shi, Zhang, & Wen, 2012), *smarca5*<sup>zko1049a</sup> heterozygous  
518 mutants (Ding et al., 2021) were raised under standard conditions (28.5°C in system water). The  
519 zebrafish embryos were raised in incubator at 28.5°C. The present study was approved by the  
520 Ethical Review Committee of the Institute of Zoology, Chinese Academy of Sciences, China.

521

522 **Whole mount *in situ* hybridization (WISH)**

523 WISH was performed as previously described (Wang et al., 2011). The Digoxigenin-labelled RNA  
524 probe genes including *gata1*, *ikaros*, *scl*, *pu.1*, and *lyz* were cloned from zebrafish cDNA and  
525 ligated to the T-vector, then *in vitro* transcribed using T7 or SP6 polymerase.

526

527 **Quantitative PCR (qPCR)**

528 Total RNAs were extracted from *smarca5*<sup>zko1049a</sup> and their sibling embryos using TRIzol reagent  
529 (Life technologies, 15596018) or from sorted RBCs using QIAGEN RNeasy Mini Kit (Cat. No.  
530 74104). The cDNA was reverse transcribed using M-MLV Reverse Transcriptase (Promega,  
531 M1701). The detailed primers used for qPCR are listed in Supplementary file 1A.

532

533 **Morpholinos (MOs)**

534 The antisense MOs were purchased from GeneTools. The sequences of MOs were used as  
535 previous described, these gene-specific MOs include *hmox1a* MO and *pu.1* MO. The detailed  
536 sequence and dosage used in this work are listed in Supplementary file 1B.

537

538 **Parabiosis experiment**

539 Parabiosis experiment was performed by following the previous published procedures (Demy et  
540 al., 2013; Hagedorn et al., 2016). Briefly, *smarca5*<sup>zko1049a</sup> and their sibling embryos between the  
541 128-cell blastula and 30% epiboly stages were removed out of chorions and gently transferred into  
542 methylcellulose drop under fish water. Then, detach a few cells from each embryo at the contact

543 points using the pulled glass micropipette and move these two embryos contact each other  
544 properly until they fusion together.

545

#### 546 **O-dianisidine staining, Giemsa-staining and Benzidine staining**

547 *smarca5<sup>zko1049a</sup>* and their sibling embryos at 2 dpf were stained with o-dianisidine staining solution  
548 for 15 min in the dark as previously described (Detrich et al., 1995). The blood cells from  
549 *smarca5<sup>zko1049a</sup>* and their sibling embryos at 2 dpf were collected from heart and caudal vein and  
550 attached to slides. The dried slides will be stained by Fast Giemsa Stain (Yeasen Biotech Co., Ltd,  
551 CAT: 40751ES02) following the standard manufacturer's instructions. The K562 cells were  
552 collected and washed once using PBS. Then the cells were suspended using 500 µl PBS.  
553 Subsequently, add 10 µl 0.4% benzidine, 1 µl 30% H<sub>2</sub>O<sub>2</sub>, and 1 µl 5% sodium nitroferricyanide  
554 dihydrate and incubate for 3 min, 5 min and 3 min, respectively. Then the cells were attached to  
555 slides for further imaging.

556

#### 557 **Chemical treatment**

558 Argatroban (Sigma, A0487), dissolved in DMSO (2 mg/ml), was injected into *smarca5<sup>zko1049a</sup>* and  
559 their sibling embryos at 36 hpf at the dosage of 4 nl/embryo. The control embryos were injected  
560 with DMSO alone at the same dosage. Heparin (Sigma, H3393), dissolved in H<sub>2</sub>O (2.5 mg/ml),  
561 was injected into *smarca5<sup>zko1049a</sup>* and their sibling embryos at 36 hpf at the dosage of 4 nl/embryo.  
562 For aspirin treatment, the *smarca5<sup>zko1049a</sup>* and sibling embryos at 36 hpf were incubated with  
563 aspirin (Sigma, A2093) at the concentration of 5 µg/ml. The *smarca5<sup>zko1049a</sup>* and sibling embryos  
564 at 36 hpf were incubated with Glutathione (Sigma, PHR1359) at the concentration of 0.5 mg/ml.

565

#### 566 **Confocal microscopy**

567 Confocal microscopy was performed using Nikon confocal A1 laser microscope (Nikon) and  
568 Andor high speed confocal (dragonfly, Belfast, UK). The embryos were embedded in 1.2% low  
569 melting agarose.

570

#### 571 **Generation of transgenic zebrafish**

572 For overexpression experiment, the full length CDS of *keap1a* was cloned into pDestTol2pA2



573 with a *hsp70* promoter and an EGFP reporter by DNA assembly (NEBuilder HiFi DNA Assembly  
574 Master Mix, E2621S). The plasmids together with *tol2* mRNA were injected into zebrafish  
575 embryos at 1-cell stage to generate Tg (*hsp70:flag-keap1a*-EGFP).

576

#### 577 **Short interfering RNAs (siRNAs) and RNA interference**

578 Control and *SMARCA5* siRNAs were synthesized by GenePharma Corporation. The K562 cells  
579 were maintained in RPMI-1640 medium supplemented with 10% FBS and stimulated with hemin  
580 (Sigma, 51280, 30  $\mu$ M) for 3 days to induce erythroid differentiation. Then, the hemin-induced  
581 K562 cells were transfected with siRNAs using Lipofectamine RNAiMAX Reagent (Invitrogen,  
582 13778-030) following the manufacturer's instructions. The detailed sequences are listed in  
583 Supplementary file 1C.

584

#### 585 **Western blotting**

586 The western blotting was performed to detect the protein level of SMARCA5 in K562 cells after  
587 siRNA transfection. The antibodies used were as followings: anti-Smarca5 antibody (Santa Cruz,  
588 H-300: sc-13054), anti- $\beta$ -Actin antibody (Cell Signaling Technology, 4967).

589

#### 590 **Flow cytometry**

591 The *smarca5*<sup>zko1049a</sup> and their sibling embryos with Tg (*gatal:dsRed*) background at 2 dpf were  
592 collected and washed by Ringers buffer. After digesting into single cell suspension using 0.5%  
593 trypsin, the reaction was stopped by adding CaCl<sub>2</sub> up to 1 M and fetal calf serum up to 10%. Then  
594 the cells were filtered through 300 Mesh nylon cell-strainer to make single cell suspension. The  
595 RBCs (*gatal:dsRed*<sup>+</sup>) were sorted using MoFlo XDP (Beckman Coulter) and collected into PBS  
596 containing 1% FBS.

597

#### 598 **RNA-seq**

599 RNA-seq was performed in FACS-purified RBCs from *smarca5*<sup>zko1049a</sup> and their siblings at 2 dpf.  
600 50,000 RBCs were used per sample for RNA-seq experiments. The RNAs of sorted HSPCs were  
601 isolated using QIAGEN RNeasy Mini Kit (Cat. No. 74104) following the standard manufacturer's  
602 instructions. The mRNA libraries were constructed using NEBNext Ultra RNA Library Prep Kit

603 for Illumina and sequenced under Illumina HiSeq X Ten with pair end 150bp (PE150).

604

### 605 **Processing of RNA-seq analysis**

606 Raw RNA-seq reads data were trimmed using the fastp (Chen, Zhou, Chen, & Gu, 2018) (v2.4)  
607 (parameter: with default parameters), and aligned to “Danio\_rerio GRCz10” cDNA reference  
608 sequence using the STAR (Dobin et al., 2013) (v 2.7.7a) with the default parameters. Read counts  
609 for each gene were quantified as the total number of reads mapping to exons using featureCounts  
610 (Liao, Smyth, & Shi, 2014) (subread v1.5.3). DESeq2 (Love, Huber, & Anders, 2014) was applied  
611 to perform differential expression analysis with raw counts quantified by featureCounts. We used  
612 Benjamini-Hochberg adjusted P-value < 0.05 and log<sub>2</sub> fold change > 1 as the threshold for  
613 significant difference. Gene set enrichment analysis was performed using *GSEA* function in the  
614 clusterProfiler (Yu, Wang, Han, & He, 2012) package (v 3.18.0). Gene set variation analysis was  
615 performed by the GSVA (Hanzelmann, Castelo, & Guinney, 2013) package (v 1.38.0). The gene  
616 sets we used were exported by the msigdb package (v 7.2.1). The differences in pathway  
617 activities scored between *smarca5<sup>zko1049a</sup>* and their sibling RBCs were calculated with limma  
618 (Ritchie et al., 2015) package (v 3.46.0).

619

### 620 **Assay for Transposase-Accessible Chromatin with high-throughput sequencing (ATAC-seq)**

621 ATAC-seq was performed in FACS-purified RBCs from *smarca5<sup>zko1049a</sup>* and their siblings at 2 dpf.  
622 50,000 RBCs were used per sample for ATAC-seq library preparation using TruePrep™ DNA  
623 Library Prep Kit V2 for Illumina (Vazyme, TD501) as previously described (Ding et al., 2021).  
624 Firstly, wash the sorted RBCs using 1xPBST. Then, the cell pellet was lysed using 50 µl cold lysis  
625 buffer (10 mM Tris-HCl (pH 7.4), 10 mM NaCl, 3 mM MgCl<sub>2</sub> and 0.15% NP-40) for 5 min on ice.  
626 Centrifuge and discard the supernatant to get the cell pellet (about 2 µl). Then the transposition  
627 reaction system combining 5xTTBL (10 µl), TTE Mix (5 µl) and H<sub>2</sub>O (33 µl) was added  
628 immediately to the cell pellet and pipetted up and down gently for several times. After the  
629 incubation at 37°C for 30 min, the DNA was extracted with chloroform-phenol. After the  
630 purification, the DNA was amplified using TruePrep™ DNA Index Kit V2 for Illumina (Vazyme,  
631 TD202). After the fragments length purification using VAHTS™ DNA Clean Beads (Vazyme,  
632 N411), The DNA libraries are under sequencing under Illumina NovaSeq with pair end 150bp

633 (PE150).

634

### 635 **Processing of ATAC-seq analysis**

636 Raw ATAC-seq reads were trimmed using cutadapt (v 2.4) (parameter: -q 20 -m 20) and mapped  
637 to the danRer10 reference genome using Bowtie2 (Langmead & Salzberg, 2012) (v 2.3.4.2)  
638 (default parameters). Sorting, removal of PCR duplicates and conversion from SAM to BAM files  
639 were performed using SAMtools (H. Li et al., 2009) (v 1.3.1). For quality assessment of  
640 ATAC-seq libraries, we applied an R package ATACseqQC (Ou et al., 2018) (v 1.6.4) to check the  
641 fragment size distributions, Transcription Start Site (TSS) enrichment scores, and plot heatmaps  
642 for nucleosome positions. We employed deepTools2 (Ramirez et al., 2016) (v 2.5.7) to check the  
643 reproducibility of the biological replicates and generated bigwig files from BAM output to  
644 visualize mapped reads. Peaks were called using MACS2 (Zhang et al., 2008) (v2.1.2) (parameter:  
645 --nomodel --nolambda --gsize 1.4e9 --keep-dup all --slocal 10000). Differentially accessible  
646 regions were identified using an R package DiffBind (Ross-Innes et al., 2012) (v 2.10.0) with a  
647 log<sub>2</sub> fold change threshold of 0.5, and Benjamini-Hochberg adjusted P-value < 0.1. Peak  
648 annotation was performed by an R package ChIPseeker (Yu, Wang, & He, 2015) (v 1.18.0). We  
649 identified the enriched de novo motifs across the whole genomic regions using the  
650 findMotifsGenome.pl function of HOMER (Heinz et al., 2010) (parameter: -size 500 -len 8,10,12  
651 -mask -dumpFasta).

652

### 653 **Transmission electron microscopy**

654 The tail region of *smarca5<sup>ko1049a</sup>* and their siblings at 2 dpf were fixed with 2.5% (vol/vol)  
655 glutaraldehyde and 2% paraformaldehyde in phosphate buffer (PB) (0.1 M, pH 7.4). After  
656 washing with PB for four times, the tissues were immersed in 1% (wt/vol) OsO<sub>4</sub> and 1.5% (wt/vol)  
657 potassium ferricyanide aqueous solution at 4°C for 1 hour. After washing, the tissues were  
658 incubated in filtered 1% thiocarbohydrazide (TCH) aqueous solution (Sigma-Aldrich) at room  
659 temperature for 30 min, followed by 1% unbuffered OsO<sub>4</sub> aqueous solution at 4°C for 1 hour and  
660 1% UA aqueous solution at room temperature for 2 hours. The tissues were dehydrated through  
661 graded alcohol (30%, 50%, 70%, 80%, 90%, 100%, 100%, 10 min each, at 4°C). Then, transfer  
662 the tissues into pure acetone for 10 min (twice). Tissues were infiltrated in graded mixtures of

663 acetone and SPI-PON812 resin (21 ml SPI-PON812, 13 ml DDSA and 11ml NMA) (3:1, 1:1, 1:3),  
664 then transfer the tissues into pure resin. Finally, the tissues were embedded in pure resin with 1.5%  
665 BDMA and polymerized at 45°C for 12 hours, followed by at 60°C for 48 hours. The ultrathin  
666 sections (70 nm thick) were sectioned with microtome (Leica EM UC6), and examined by a  
667 transmission electron microscope (FEI Tecnai Spirit120kV).

668

### 669 **Image Analysis**

670 Raw image data were processed using ImageJ, photoshop CC 2018 and Adobe Illustrator CC  
671 2018.

672

### 673 **Statistical Analysis**

674 All of the statistical analysis was performed for at least three independent biological repeats.  
675 GraphPad Prism 6 was used to analyze the data. Data are mean  $\pm$  s.d. *P* values calculated by  
676 two-tailed unpaired Student's *t*-test were used to indicate the significance if not clarified in figure  
677 legends.

678

### 679 **DATA AVAILABILITY**

680 The accession number for the sequencing raw data in this paper is BioProject: PRJNA716463.  
681 Source data of supplemental Figure 6D was provided, including the original files of the full raw  
682 unedited blots (supplemental Figure 6-source data 2 and 4) and figures with the uncropped blots  
683 with the relevant bands clearly labelled (supplemental Figure 6-source data 1 and 3).

684

### 685 **Acknowledgments**

686 We thank Lihong Shi and Jun Peng for critical reading of this paper. We are grateful to Xixia Li,  
687 and Xueke Tan for helping with electron microscopy sample preparation and taking TEM images  
688 at the Center for Biological Imaging (CBI), Institute of Biophysics, Chinese Academy of Science.  
689 This work was supported by grants from the National Key Research and Development Program of  
690 China (2018YFA0800200), the Strategic Priority Research Program of the Chinese Academy of  
691 Sciences, China (XDA16010207), the National Natural Science Foundation of China (31830061,  
692 31425016, and 81530004), and the State Key Laboratory of Membrane Biology, China.

693

694 **Authorship Contributions**

695 Y.D. performed most of the experiments; Y.L. performed the bioinformatics analysis; Y.D., Y.L.,

696 Q.Z., and F.L. conceived the project, analyzed the data, and wrote the paper. All authors read and

697 approved the final manuscript.

698

699 **Conflict of Interest Disclosures**

700 The authors declare no competing interests.

701

702 **References**

- 703 Akin-Bali, D. F., Eroglu, T., Ilk, S., Egin, Y., & Kankilic, T. (2020). Evaluation of the role of  
704 Nrf2/Keap1 pathway-associated novel mutations and gene expression on antioxidant  
705 status in patients with deep vein thrombosis. *Exp Ther Med*, *20*(2), 868-881.  
706 doi:10.3892/etm.2020.8790
- 707 Bertrand, J. Y., Chi, N. C., Santoso, B., Teng, S. T., Stainier, D. Y. R., & Traver, D. (2010).  
708 Haematopoietic stem cells derive directly from aortic endothelium during development.  
709 *Nature*, *464*(7285), 108-U120. doi:10.1038/nature08738
- 710 Bultman, S. J., Gebuhr, T. C., & Magnuson, T. (2005). A Brg1 mutation that uncouples  
711 ATPase activity from chromatin remodeling reveals an essential role for  
712 SWI/SNF-related complexes in beta-globin expression and erythroid development.  
713 *Genes Dev*, *19*(23), 2849-2861. doi:10.1101/gad.1364105
- 714 Chen, S., Zhou, Y., Chen, Y., & Gu, J. (2018). fastp: an ultra-fast all-in-one FASTQ  
715 preprocessor. *Bioinformatics*, *34*(17), i884-i890. doi:10.1093/bioinformatics/bty560
- 716 Clapier, C. R., Iwasa, J., Cairns, B. R., & Peterson, C. L. (2017). Mechanisms of action and  
717 regulation of ATP-dependent chromatin-remodelling complexes. *Nat Rev Mol Cell Biol*,  
718 *18*(7), 407-422. doi:10.1038/nrm.2017.26
- 719 Demy, D. L., Ranta, Z., Giorgi, J. M., Gonzalez, M., Herbomel, P., & Kissa, K. (2013).  
720 Generating parabiotic zebrafish embryos for cell migration and homing studies. *Nat*  
721 *Methods*, *10*(3), 256-258. doi:10.1038/nmeth.2362
- 722 Detrich, H. W., 3rd, Kieran, M. W., Chan, F. Y., Barone, L. M., Yee, K., Rundstadler, J. A.,  
723 Pratt, S., Ransom, D., & Zon, L. I. (1995). Intraembryonic hematopoietic cell migration

- 724 during vertebrate development. *Proc Natl Acad Sci U S A*, *92*(23), 10713-10717.
- 725 doi:10.1073/pnas.92.23.10713
- 726 Diaz, J. A., Saha, P., Cooley, B., Palmer, O. R., Grover, S. P., Mackman, N., Wakefield, T. W.,
- 727 Henke, P. K., Smith, A., & Lal, B. K. (2019). Choosing a mouse model of venous
- 728 thrombosis: a consensus assessment of utility and application. *J Thromb Haemost*,
- 729 *17*(4), 699-707. doi:10.1111/jth.14413
- 730 Ding, Y., Wang, W., Ma, D., Liang, G., Kang, Z., Xue, Y., Zhang, Y., Wang, L., Heng, J., Zhang,
- 731 Y., & Liu, F. (2021). Smarca5-mediated epigenetic programming facilitates fetal HSPC
- 732 development in vertebrates. *Blood*, *137*(2), 190-202. doi:10.1182/blood.2020005219
- 733 Dluhosova, M., Curik, N., Vargova, J., Jonasova, A., Zikmund, T., & Stopka, T. (2014).
- 734 Epigenetic control of SPI1 gene by CTCF and ISWI ATPase SMARCA5. *Plos One*,
- 735 *9*(2), e87448. doi:10.1371/journal.pone.0087448
- 736 Dobin, A., Davis, C. A., Schlesinger, F., Drenkow, J., Zaleski, C., Jha, S., Batut, P., Chaisson,
- 737 M., & Gingeras, T. R. (2013). STAR: ultrafast universal RNA-seq aligner.
- 738 *Bioinformatics*, *29*(1), 15-21. doi:10.1093/bioinformatics/bts635
- 739 Gao, Z., Huang, Z., Olivey, H. E., Gurbuxani, S., Crispino, J. D., & Svensson, E. C. (2010).
- 740 FOG-1-mediated recruitment of NuRD is required for cell lineage re-enforcement
- 741 during haematopoiesis. *Embo Journal*, *29*(2), 457-468. doi:10.1038/emboj.2009.368
- 742 Garcia-Santos, D., Schranzhofer, M., Horvathova, M., Jaberli, M. M., Bogo Chies, J. A., Sheftel,
- 743 A. D., & Ponka, P. (2014). Heme oxygenase 1 is expressed in murine erythroid cells
- 744 where it controls the level of regulatory heme. *Blood*, *123*(14), 2269-2277.
- 745 doi:10.1182/blood-2013-04-496760

- 746 Gregory, G. D., Miccio, A., Bersenev, A., Wang, Y., Hong, W., Zhang, Z., Poncz, M., Tong, W.,  
747 & Blobel, G. A. (2010). FOG1 requires NuRD to promote hematopoiesis and maintain  
748 lineage fidelity within the megakaryocytic-erythroid compartment. *Blood*, *115*(11),  
749 2156-2166. doi:10.1182/blood-2009-10-251280
- 750 Gregory, M., Hanumanthaiah, R., & Jagadeeswaran, P. (2002). Genetic analysis of  
751 hemostasis and thrombosis using vascular occlusion. *Blood Cells Mol Dis*, *29*(3),  
752 286-295. doi:10.1006/bcmd.2002.0568
- 753 Griffin, C. T., Brennan, J., & Magnuson, T. (2008). The chromatin-remodeling enzyme BRG1  
754 plays an essential role in primitive erythropoiesis and vascular development.  
755 *Development*, *135*(3), 493-500. doi:10.1242/dev.010090
- 756 Grover, S. P., & Mackman, N. (2019). Intrinsic Pathway of Coagulation and Thrombosis.  
757 *Arterioscler Thromb Vasc Biol*, *39*(3), 331-338. doi:10.1161/ATVBAHA.118.312130
- 758 Hagedorn, E. J., Cillis, J. L., Curley, C. R., Patch, T. C., Li, B., Blaser, B. W., Riquelme, R., Zon,  
759 L. I., & Shah, D. I. (2016). Generation of Parabiotic Zebrafish Embryos by Surgical  
760 Fusion of Developing Blastulae. *J Vis Exp*(112). doi:10.3791/54168
- 761 Hanumanthaiah, R., Day, K., & Jagadeeswaran, P. (2002). Comprehensive analysis of blood  
762 coagulation pathways in teleostei: evolution of coagulation factor genes and  
763 identification of zebrafish factor VIII. *Blood Cells Mol Dis*, *29*(1), 57-68.  
764 doi:10.1006/bcmd.2002.0534
- 765 Hanzelmann, S., Castelo, R., & Guinney, J. (2013). GSVA: gene set variation analysis for  
766 microarray and RNA-seq data. *BMC Bioinformatics*, *14*, 7.  
767 doi:10.1186/1471-2105-14-7



- 768 Hassannia, B., Vandenabeele, P., & Vanden Berghe, T. (2019). Targeting Ferroptosis to Iron  
769 Out Cancer. *Cancer Cell*, 35(6), 830-849. doi:10.1016/j.ccell.2019.04.002
- 770 Heinz, S., Benner, C., Spann, N., Bertolino, E., Lin, Y. C., Laslo, P., Cheng, J. X., Murre, C.,  
771 Singh, H., & Glass, C. K. (2010). Simple combinations of lineage-determining  
772 transcription factors prime cis-regulatory elements required for macrophage and B cell  
773 identities. *Mol Cell*, 38(4), 576-589. doi:10.1016/j.molcel.2010.05.004
- 774 Hewitt, K. J., Sanalkumar, R., Johnson, K. D., Keles, S., & Bresnick, E. H. (2014). Epigenetic  
775 and genetic mechanisms in red cell biology. *Curr Opin Hematol*, 21(3), 155-164.  
776 doi:10.1097/MOH.0000000000000034
- 777 Itoh, K., Chiba, T., Takahashi, S., Ishii, T., Igarashi, K., Katoh, Y., Oyake, T., Hayashi, N.,  
778 Satoh, K., Hatayama, I., Yamamoto, M., & Nabeshima, Y. (1997). An Nrf2/small Maf  
779 heterodimer mediates the induction of phase II detoxifying enzyme genes through  
780 antioxidant response elements. *Biochem Biophys Res Commun*, 236(2), 313-322.  
781 doi:10.1006/bbrc.1997.6943
- 782 Itoh, K., Wakabayashi, N., Katoh, Y., Ishii, T., Igarashi, K., Engel, J. D., & Yamamoto, M.  
783 (1999). Keap1 represses nuclear activation of antioxidant responsive elements by  
784 Nrf2 through binding to the amino-terminal Neh2 domain. *Genes Dev*, 13(1), 76-86.  
785 doi:10.1101/gad.13.1.76
- 786 Jagadeeswaran, P., Sheehan, J. P., Craig, F. E., & Troyer, D. (1999). Identification and  
787 characterization of zebrafish thrombocytes. *Br J Haematol*, 107(4), 731-738.  
788 doi:10.1046/j.1365-2141.1999.01763.x
- 789 Kato, G. J., Piel, F. B., Reid, C. D., Gaston, M. H., Ohene-Frempong, K., Krishnamurti, L.,

- 790 Smith, W. R., Panepinto, J. A., Weatherall, D. J., Costa, F. F., & Vichinsky, E. P.  
791 (2018). Sickle cell disease. *Nat Rev Dis Primers*, 4, 18010. doi:10.1038/nrdp.2018.10
- 792 Langmead, B., & Salzberg, S. L. (2012). Fast gapped-read alignment with Bowtie 2. *Nat*  
793 *Methods*, 9(4), 357-359. doi:10.1038/nmeth.1923
- 794 Lewerenz, J., Ates, G., Methner, A., Conrad, M., & Maher, P. (2018).  
795 Oxytosis/Ferroptosis-(Re-) Emerging Roles for Oxidative Stress-Dependent  
796 Non-apoptotic Cell Death in Diseases of the Central Nervous System. *Front Neurosci*,  
797 12, 214. doi:10.3389/fnins.2018.00214
- 798 Li, H., Handsaker, B., Wysoker, A., Fennell, T., Ruan, J., Homer, N., Marth, G., Abecasis, G.,  
799 Durbin, R., & Genome Project Data Processing, Subgroup. (2009). The Sequence  
800 Alignment/Map format and SAMtools. *Bioinformatics*, 25(16), 2078-2079.  
801 doi:10.1093/bioinformatics/btp352
- 802 Li, L., Yan, B., Shi, Y. Q., Zhang, W. Q., & Wen, Z. L. (2012). Live Imaging Reveals Differing  
803 Roles of Macrophages and Neutrophils during Zebrafish Tail Fin Regeneration.  
804 *Journal of Biological Chemistry*, 287(30), 25353-25360. doi:10.1074/jbc.M112.349126
- 805 Liao, Y., Smyth, G. K., & Shi, W. (2014). featureCounts: an efficient general purpose program  
806 for assigning sequence reads to genomic features. *Bioinformatics*, 30(7), 923-930.  
807 doi:10.1093/bioinformatics/btt656
- 808 Lin, H. F., Traver, D., Zhu, H., Dooley, K., Paw, B. H., Zen, L. I., & Handin, R. I. (2005).  
809 Analysis of thrombocyte development in CD41-GFP transgenic zebrafish. *Blood*,  
810 106(12), 3803-3810. doi:10.1182/blood-2005-01-0179
- 811 Liu, Y., Kretz, C. A., Maeder, M. L., Richter, C. E., Tsao, P., Vo, A. H., Huarng, M. C., Rode, T.,

- 812 Hu, Z., Mehra, R., Olson, S. T., Joung, J. K., & Shavit, J. A. (2014). Targeted  
813 mutagenesis of zebrafish antithrombin III triggers disseminated intravascular  
814 coagulation and thrombosis, revealing insight into function. *Blood*, *124*(1), 142-150.  
815 doi:10.1182/blood-2014-03-561027
- 816 Love, M. I., Huber, W., & Anders, S. (2014). Moderated estimation of fold change and  
817 dispersion for RNA-seq data with DESeq2. *Genome Biol*, *15*(12), 550.  
818 doi:10.1186/s13059-014-0550-8
- 819 Mackman, N. (2008). Triggers, targets and treatments for thrombosis. *Nature*, *451*(7181),  
820 914-918. doi:10.1038/nature06797
- 821 Mackman, N., Bergmeier, W., Stouffer, G. A., & Weitz, J. I. (2020). Therapeutic strategies for  
822 thrombosis: new targets and approaches. *Nat Rev Drug Discov*, *19*(5), 333-352.  
823 doi:10.1038/s41573-020-0061-0
- 824 Miccio, A., & Blobel, G. A. (2010). Role of the GATA-1/FOG-1/NuRD pathway in the  
825 expression of human beta-like globin genes. *Mol Cell Biol*, *30*(14), 3460-3470.  
826 doi:10.1128/MCB.00001-10
- 827 Murakami, S., Shimizu, R., Romeo, P. H., Yamamoto, M., & Motohashi, H. (2014). Keap1-Nrf2  
828 system regulates cell fate determination of hematopoietic stem cells. *Genes Cells*,  
829 *19*(3), 239-253. doi:10.1111/gtc.12126
- 830 Ou, J., Liu, H., Yu, J., Kelliher, M. A., Castilla, L. H., Lawson, N. D., & Zhu, L. J. (2018).  
831 ATACseqQC: a Bioconductor package for post-alignment quality assessment of  
832 ATAC-seq data. *BMC Genomics*, *19*(1), 169. doi:10.1186/s12864-018-4559-3
- 833 Ramirez, F., Ryan, D. P., Gruning, B., Bhardwaj, V., Kilpert, F., Richter, A. S., Heyne, S.,

- 834 Dundar, F., & Manke, T. (2016). deepTools2: a next generation web server for  
835 deep-sequencing data analysis. *Nucleic Acids Res*, *44*(W1), W160-165.  
836 doi:10.1093/nar/gkw257
- 837 Renshaw, S. A., Loynes, C. A., Trushell, D. M. I., Elworthy, S., Ingham, P. W., & Whyte, M. K.  
838 B. (2006). A transgenic zebrafish model of neutrophilic inflammation. *Blood*, *108*(13),  
839 3976-3978. doi:10.1182/blood-2006-05-024075
- 840 Ritchie, M. E., Phipson, B., Wu, D., Hu, Y., Law, C. W., Shi, W., & Smyth, G. K. (2015). limma  
841 powers differential expression analyses for RNA-sequencing and microarray studies.  
842 *Nucleic Acids Res*, *43*(7), e47. doi:10.1093/nar/gkv007
- 843 Rodriguez, P., Bonte, E., Krijgsveld, J., Kolodziej, K. E., Guyot, B., Heck, A. J., Vyas, P., de  
844 Boer, E., Grosveld, F., & Strouboulis, J. (2005). GATA-1 forms distinct activating and  
845 repressive complexes in erythroid cells. *Embo Journal*, *24*(13), 2354-2366.  
846 doi:10.1038/sj.emboj.7600702
- 847 Rodriguez-Garcia, R., Lopez-Montero, I., Mell, M., Egea, G., Gov, N. S., & Monroy, F. (2016).  
848 Direct Cytoskeleton Forces Cause Membrane Softening in Red Blood Cells. *Biophys J*,  
849 *111*(5), 1101. doi:10.1016/j.bpj.2016.08.022
- 850 Ross-Innes, C. S., Stark, R., Teschendorff, A. E., Holmes, K. A., Ali, H. R., Dunning, M. J.,  
851 Brown, G. D., Gojis, O., Ellis, I. O., Green, A. R., Ali, S., Chin, S. F., Palmieri, C.,  
852 Caldas, C., & Carroll, J. S. (2012). Differential oestrogen receptor binding is  
853 associated with clinical outcome in breast cancer. *Nature*, *481*(7381), 389-393.  
854 doi:10.1038/nature10730
- 855 Roumenina, L. T., Rayes, J., Lacroix-Desmazes, S., & Dimitrov, J. D. (2016). Heme:

- 856 Modulator of Plasma Systems in Hemolytic Diseases. *Trends Mol Med*, 22(3),  
857 200-213. doi:10.1016/j.molmed.2016.01.004
- 858 Sheehan, J., Templer, M., Gregory, M., Hanumanthaiah, R., Troyer, D., Phan, T., Thankavel,  
859 B., & Jagadeeswaran, P. (2001). Demonstration of the extrinsic coagulation pathway  
860 in teleostei: identification of zebrafish coagulation factor VII. *Proc Natl Acad Sci U S A*,  
861 98(15), 8768-8773. doi:10.1073/pnas.131109398
- 862 Traver, D., Paw, B. H., Poss, K. D., Penberthy, W. T., Lin, S., & Zon, L. I. (2003).  
863 Transplantation and in vivo imaging of multilineage engraftment in zebrafish bloodless  
864 mutants. *Nature Immunology*, 4(12), 1238-1246. doi:10.1038/ni1007
- 865 Wang, L., Zhang, P. P., Wei, Y. L., Gao, Y., Patient, R., & Liu, F. (2011). A blood  
866 flow-dependent klf2a-NO signaling cascade is required for stabilization of  
867 hematopoietic stem cell programming in zebrafish embryos. *Blood*, 118(15),  
868 4102-4110. doi:10.1182/blood-2011-05-353235
- 869 Weisel, J. W., & Litvinov, R. I. (2019). Red blood cells: the forgotten player in hemostasis and  
870 thrombosis. *J Thromb Haemost*, 17(2), 271-282. doi:10.1111/jth.14360
- 871 Wendelboe, A. M., & Raskob, G. E. (2016). Global Burden of Thrombosis: Epidemiologic  
872 Aspects. *Circ Res*, 118(9), 1340-1347. doi:10.1161/CIRCRESAHA.115.306841
- 873 Wolberg, A. S., Rosendaal, F. R., Weitz, J. I., Jaffer, I. H., Agnelli, G., Baglin, T., & Mackman,  
874 N. (2015). Venous thrombosis. *Nat Rev Dis Primers*, 1, 15006.  
875 doi:10.1038/nrdp.2015.6
- 876 Yu, G., Wang, L. G., Han, Y., & He, Q. Y. (2012). clusterProfiler: an R package for comparing  
877 biological themes among gene clusters. *OMICS*, 16(5), 284-287.

- 878           doi:10.1089/omi.2011.0118
- 879   Yu, G., Wang, L. G., & He, Q. Y. (2015). ChIPseeker: an R/Bioconductor package for ChIP  
880           peak annotation, comparison and visualization. *Bioinformatics*, *31*(14), 2382-2383.  
881           doi:10.1093/bioinformatics/btv145
- 882   Zapilko, V., Fish, R. J., Garcia, A., Reny, J. L., Dunoyer-Geindre, S., Lecompte, T.,  
883           Neerman-Arbez, M., & Fontana, P. (2020). MicroRNA-126 is a regulator of  
884           platelet-supported thrombin generation. *Platelets*, *31*(6), 746-755.  
885           doi:10.1080/09537104.2020.1775804
- 886   Zhang, Y., Liu, T., Meyer, C. A., Eeckhoute, J., Johnson, D. S., Bernstein, B. E., Nusbaum, C.,  
887           Myers, R. M., Brown, M., Li, W., & Liu, X. S. (2008). Model-based analysis of  
888           ChIP-Seq (MACS). *Genome Biol*, *9*(9), R137. doi:10.1186/gb-2008-9-9-r137
- 889   Zhu, X. Y., Liu, H. C., Guo, S. Y., Xia, B., Song, R. S., Lao, Q. C., Xuan, Y. X., & Li, C. Q.  
890           (2016). A Zebrafish Thrombosis Model for Assessing Antithrombotic Drugs. *Zebrafish*,  
891           *13*(4), 335-344. doi:10.1089/zeb.2016.1263  
892

# Figure S1

## A

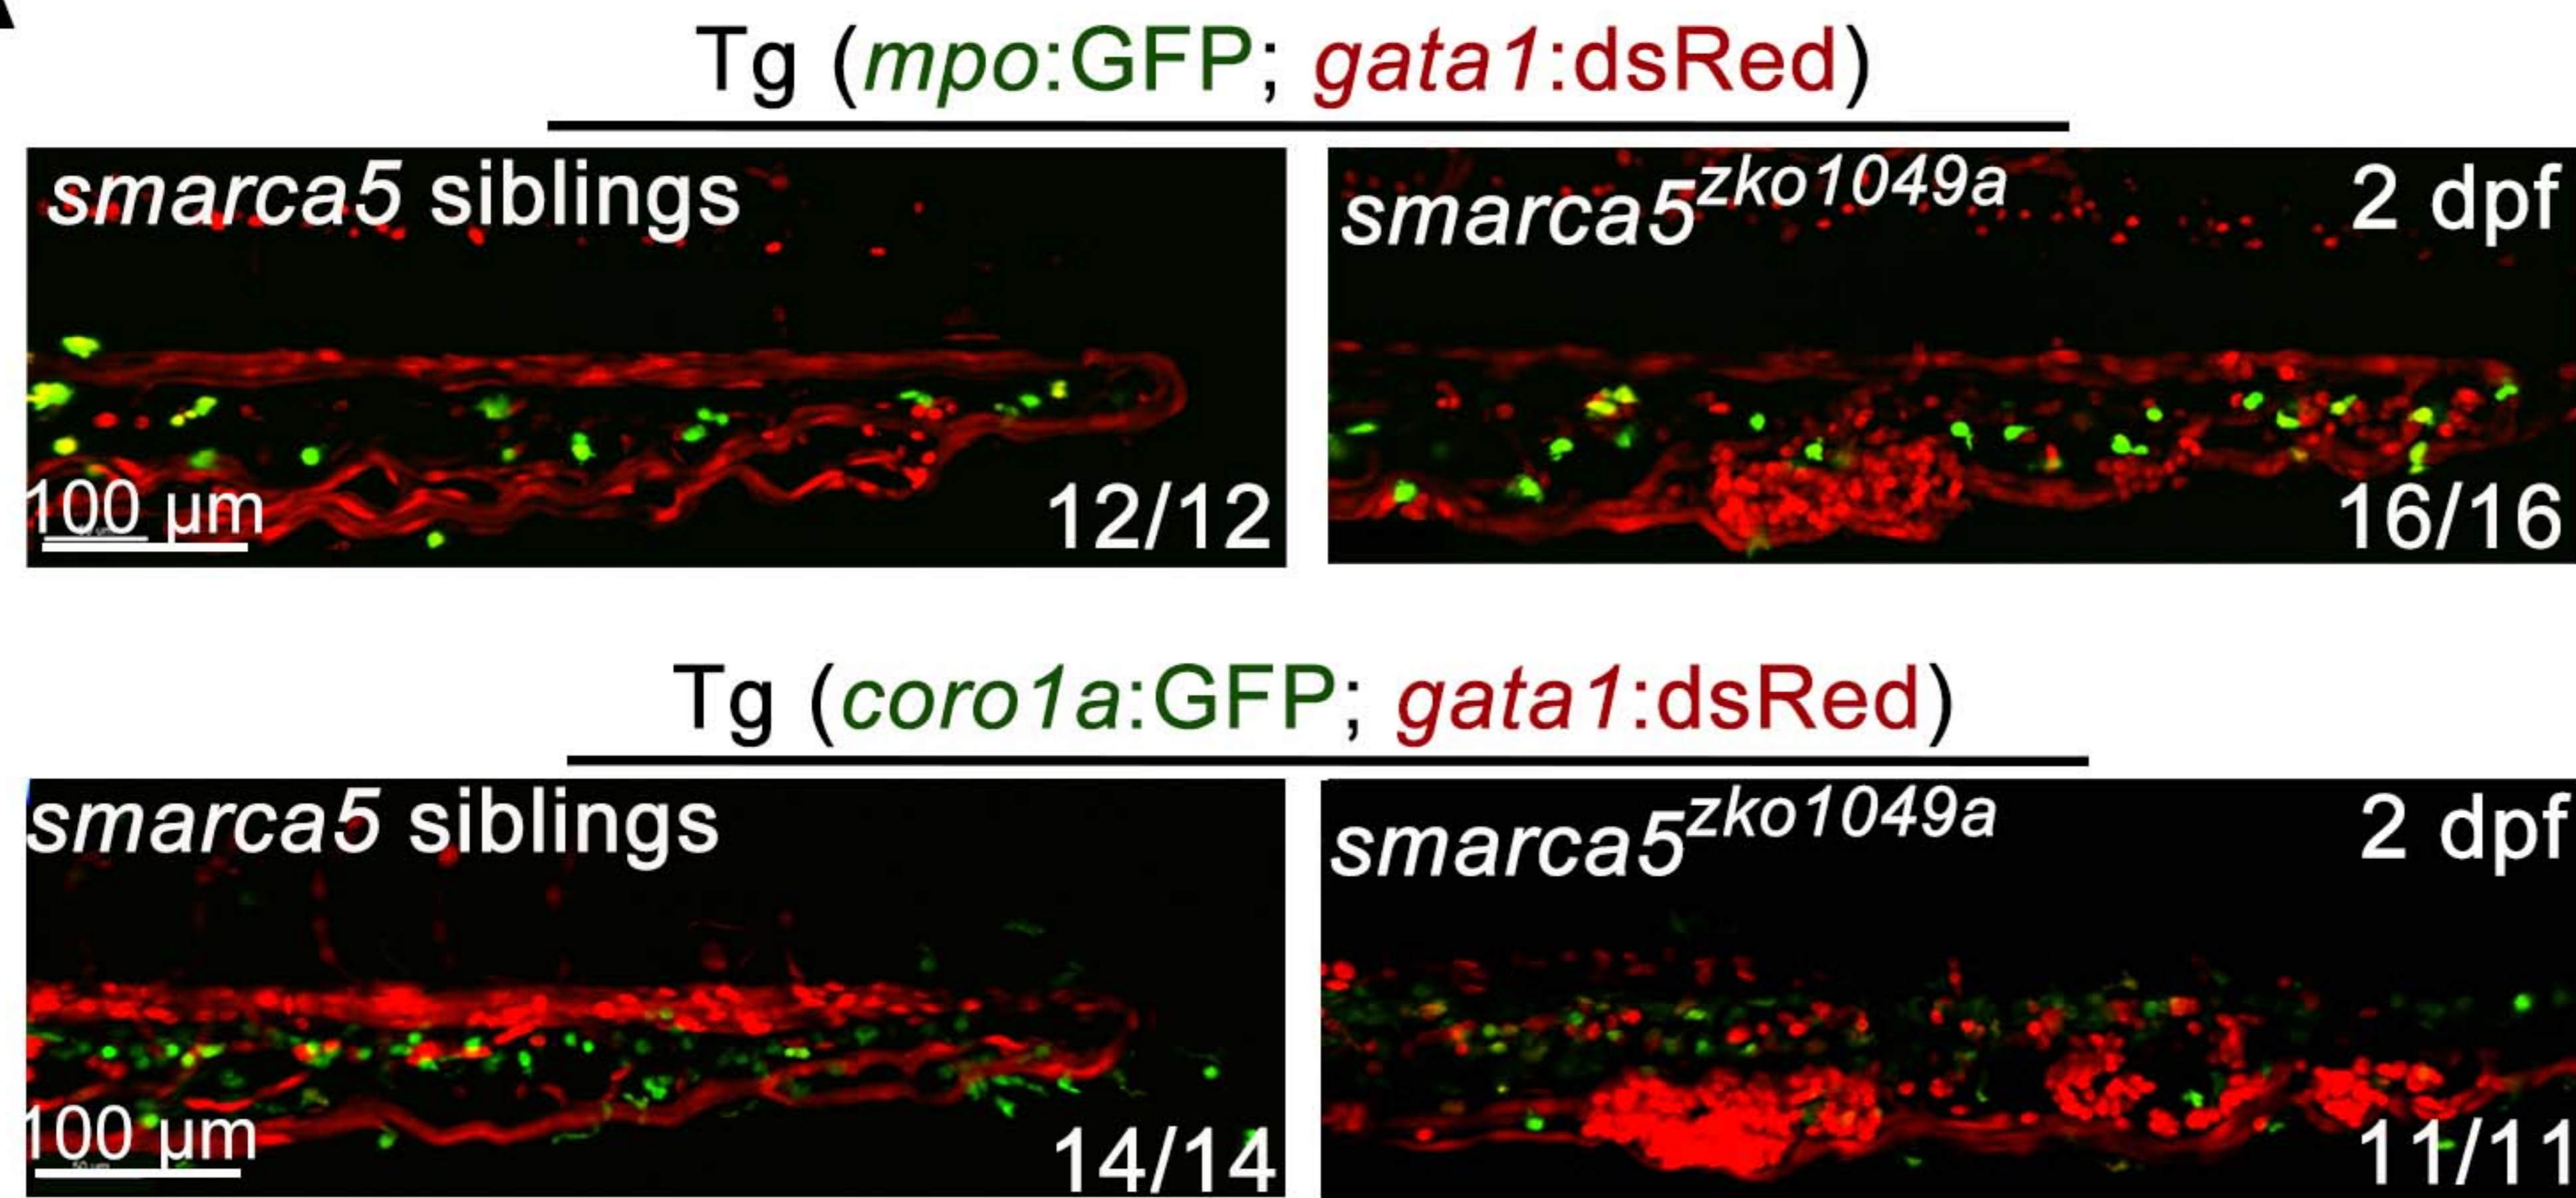

## B

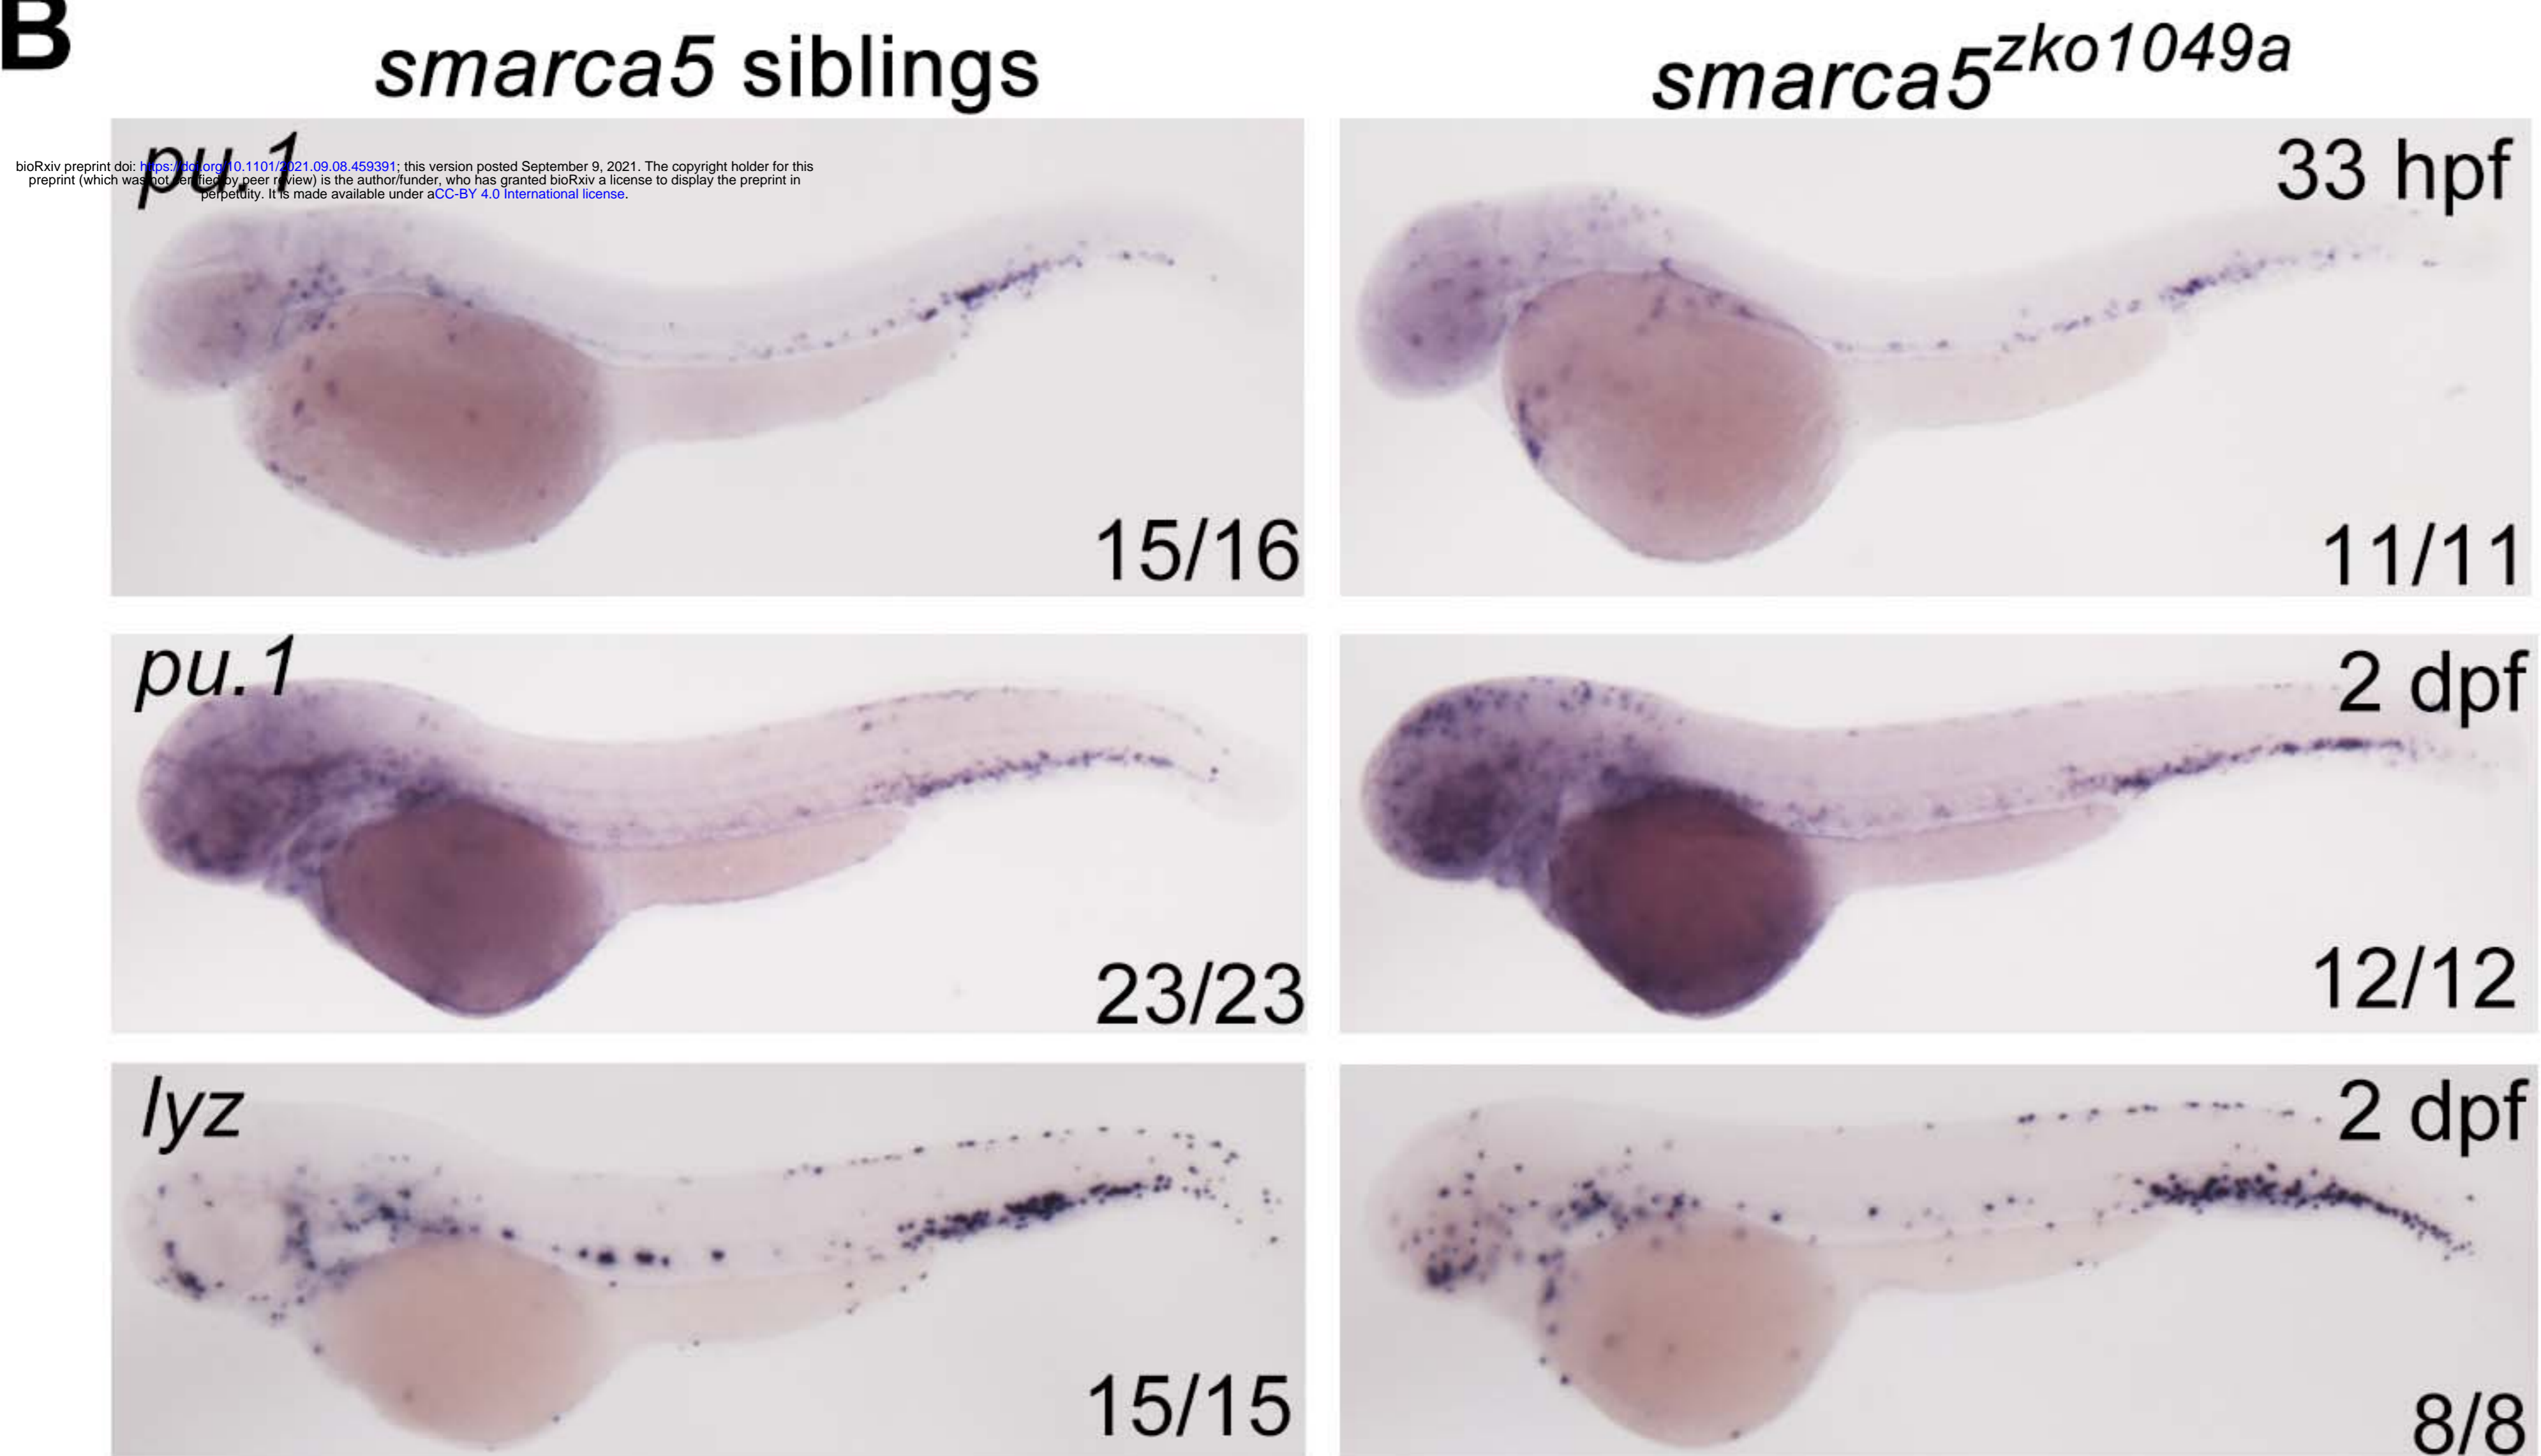

## C

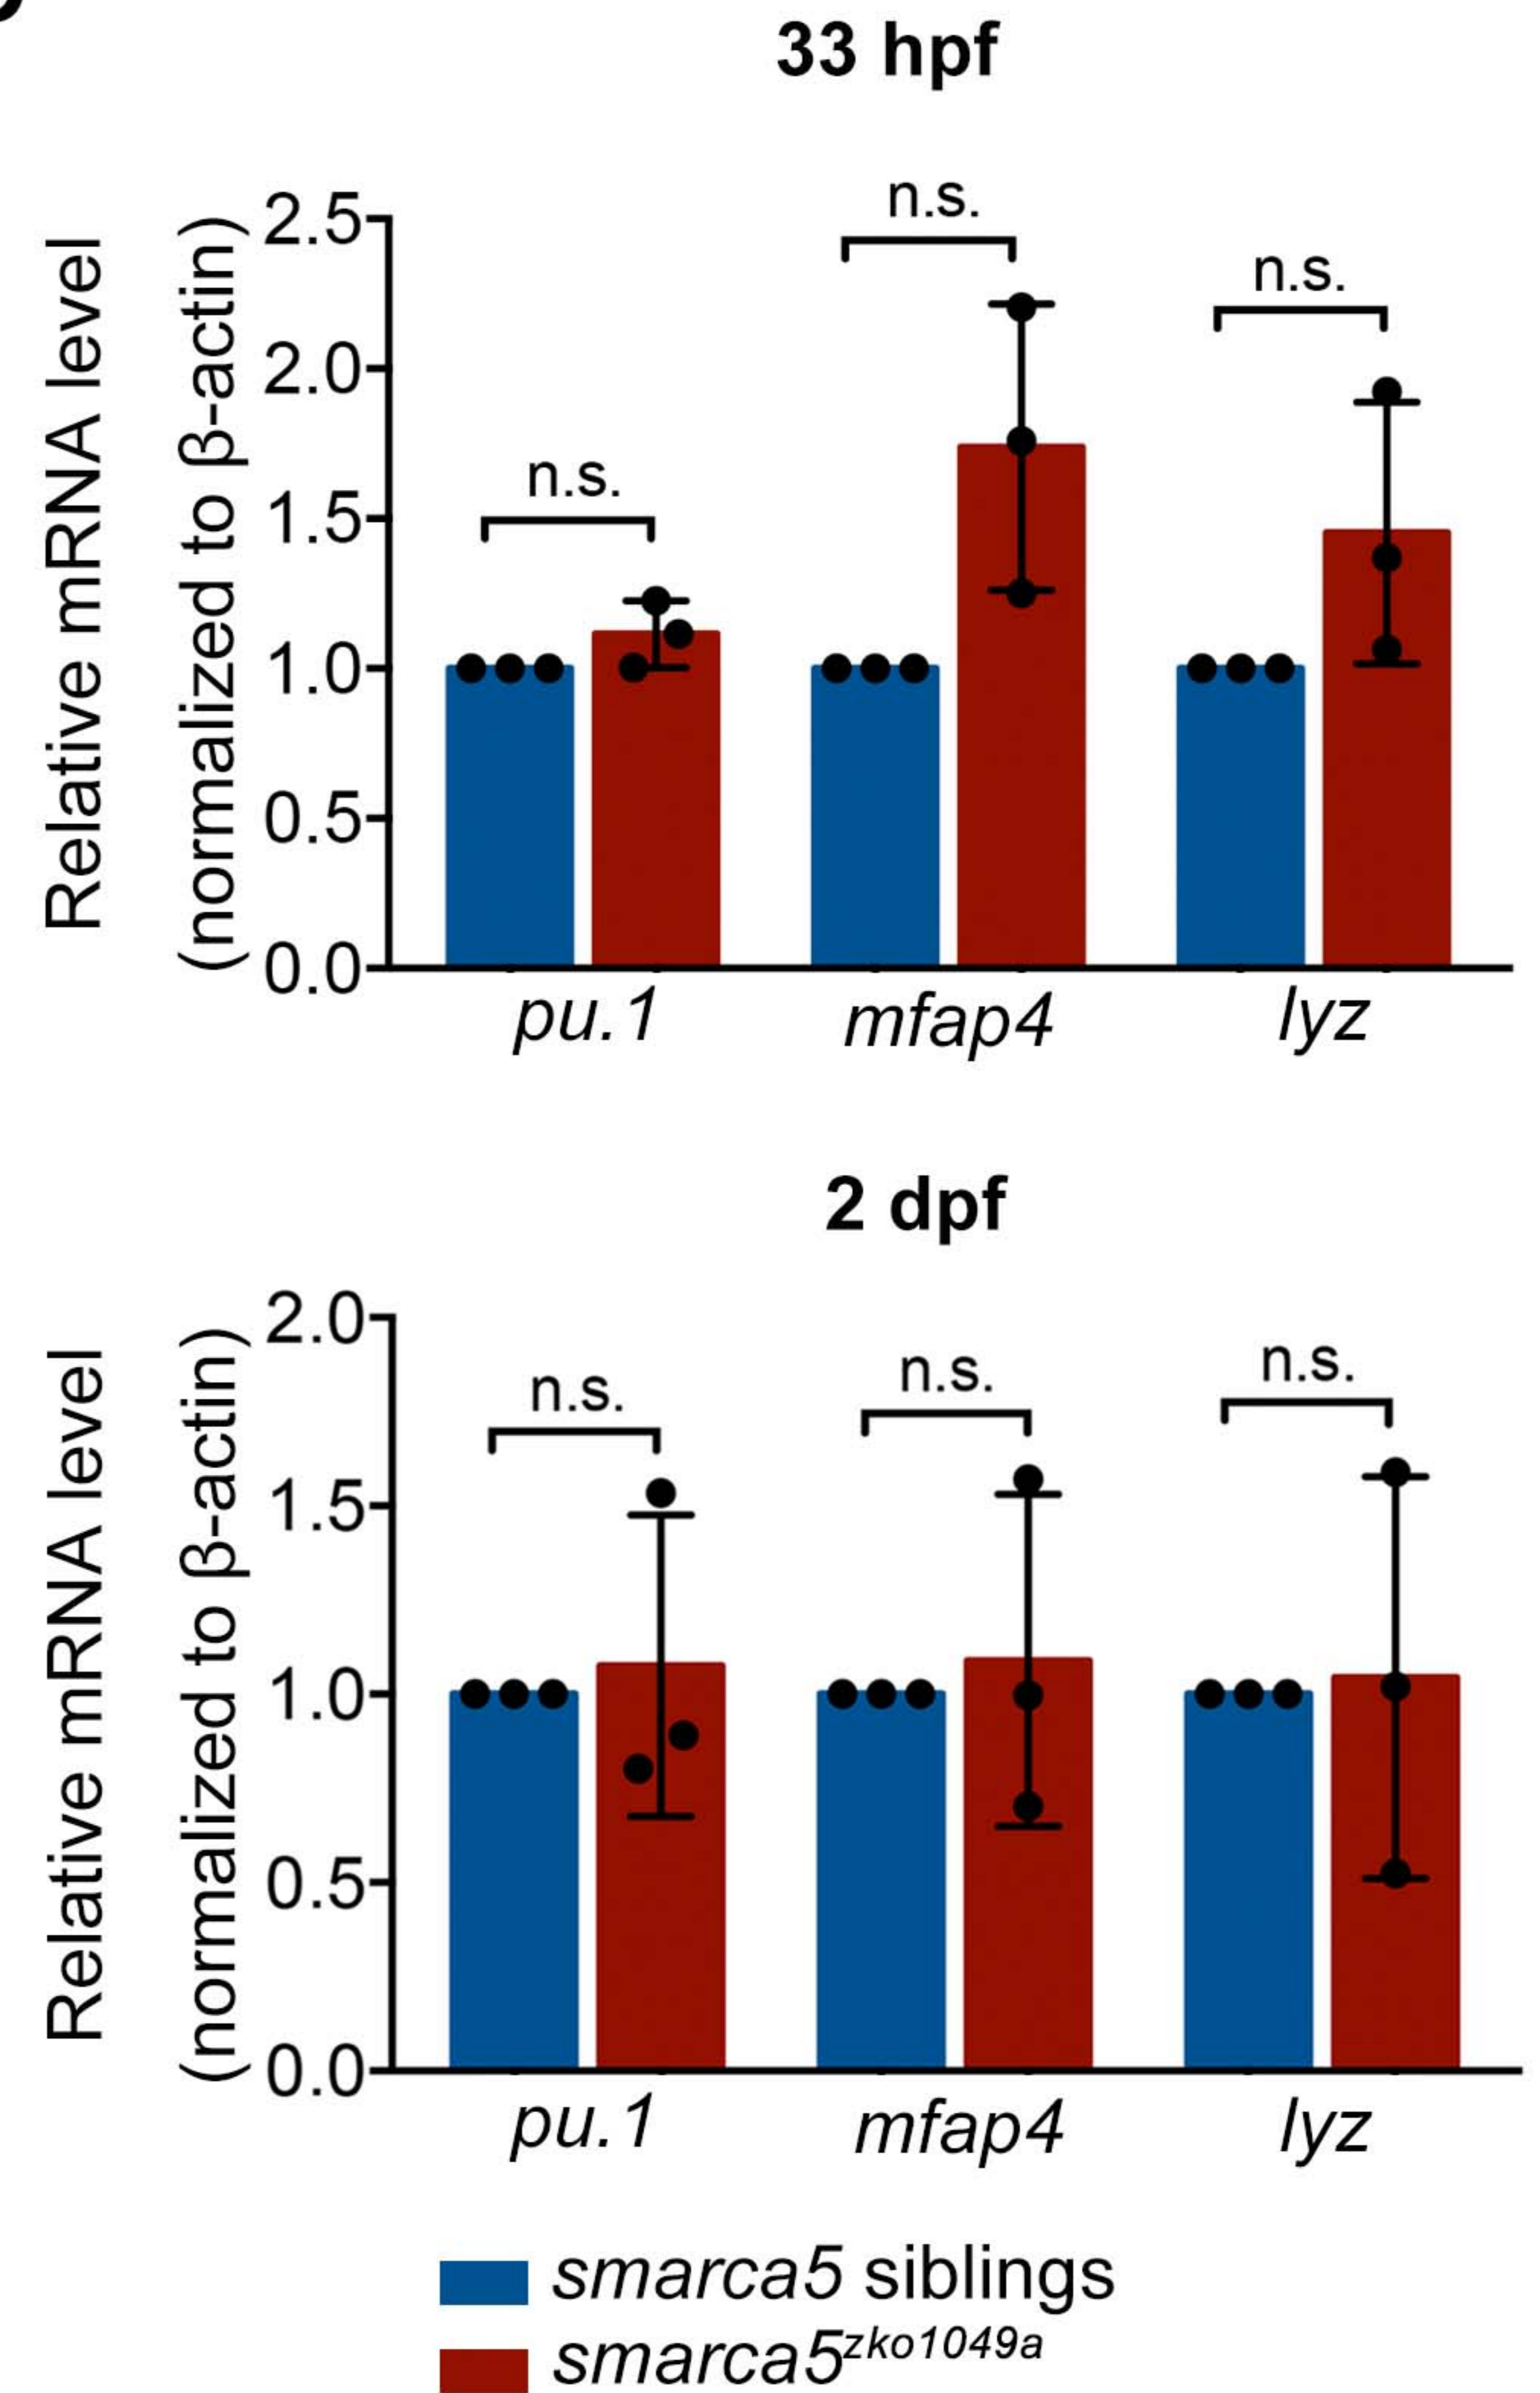

# Figure S2

## A

*kdrl:mCherry;cmyb:GFP*

*smarca5* siblings

*smarca5<sup>zko1049a</sup>* 2 dpf

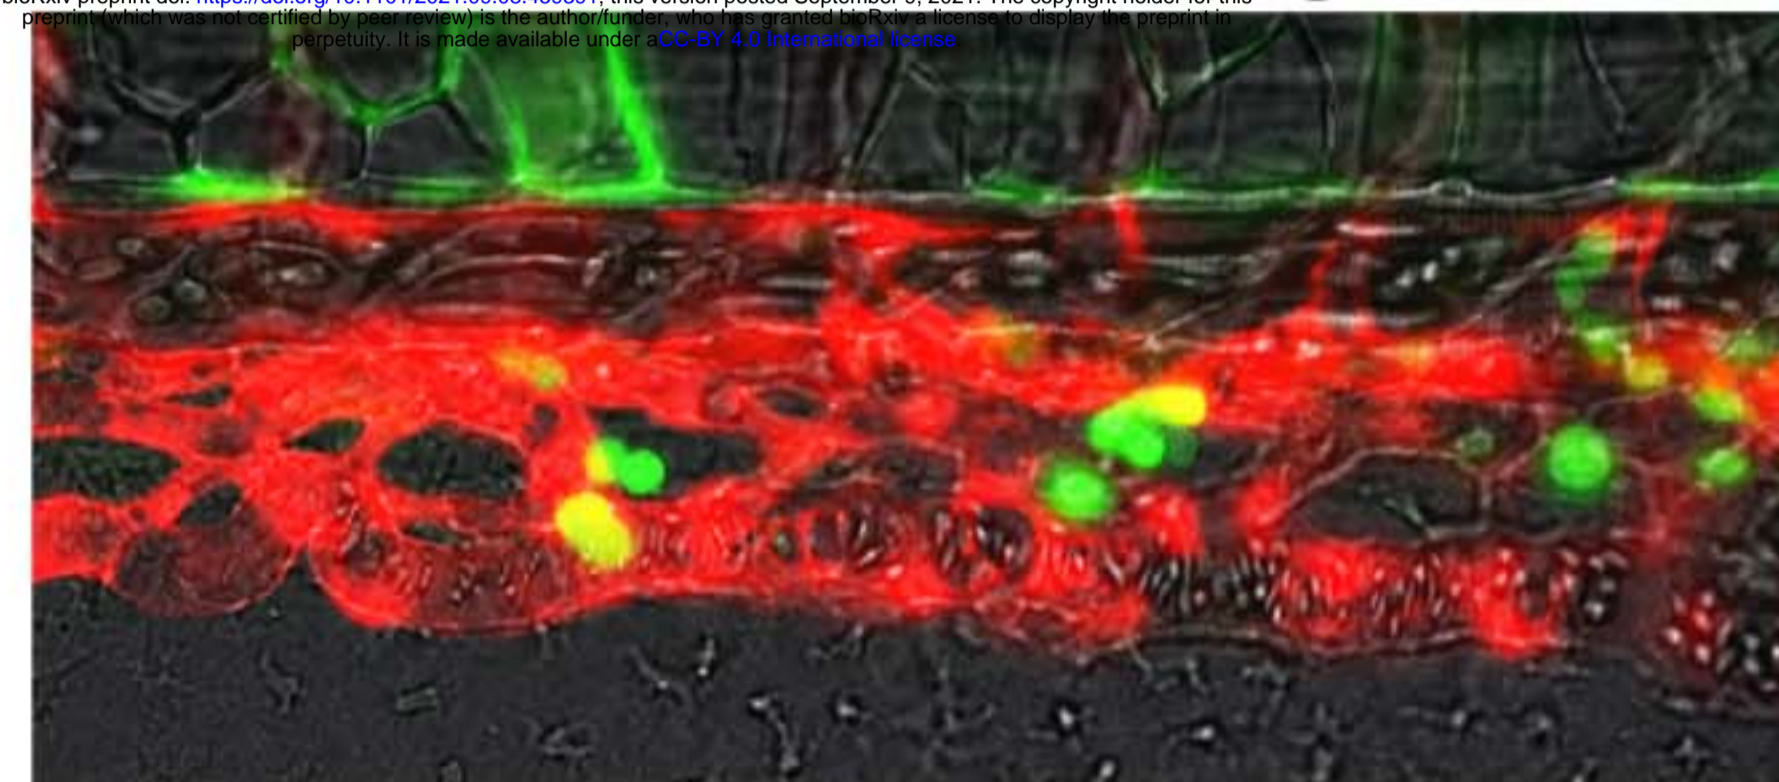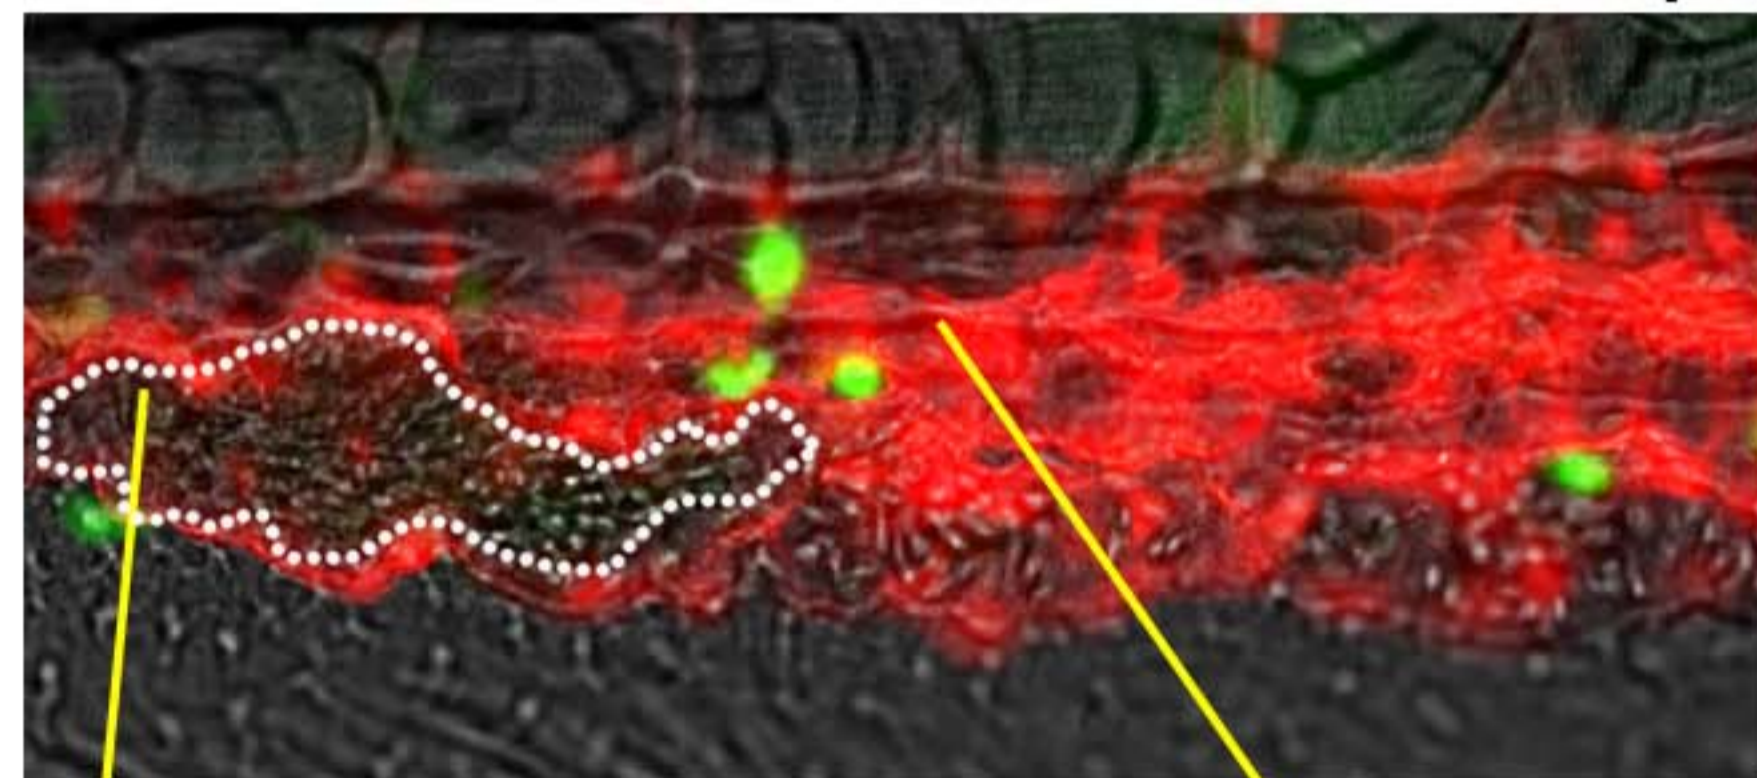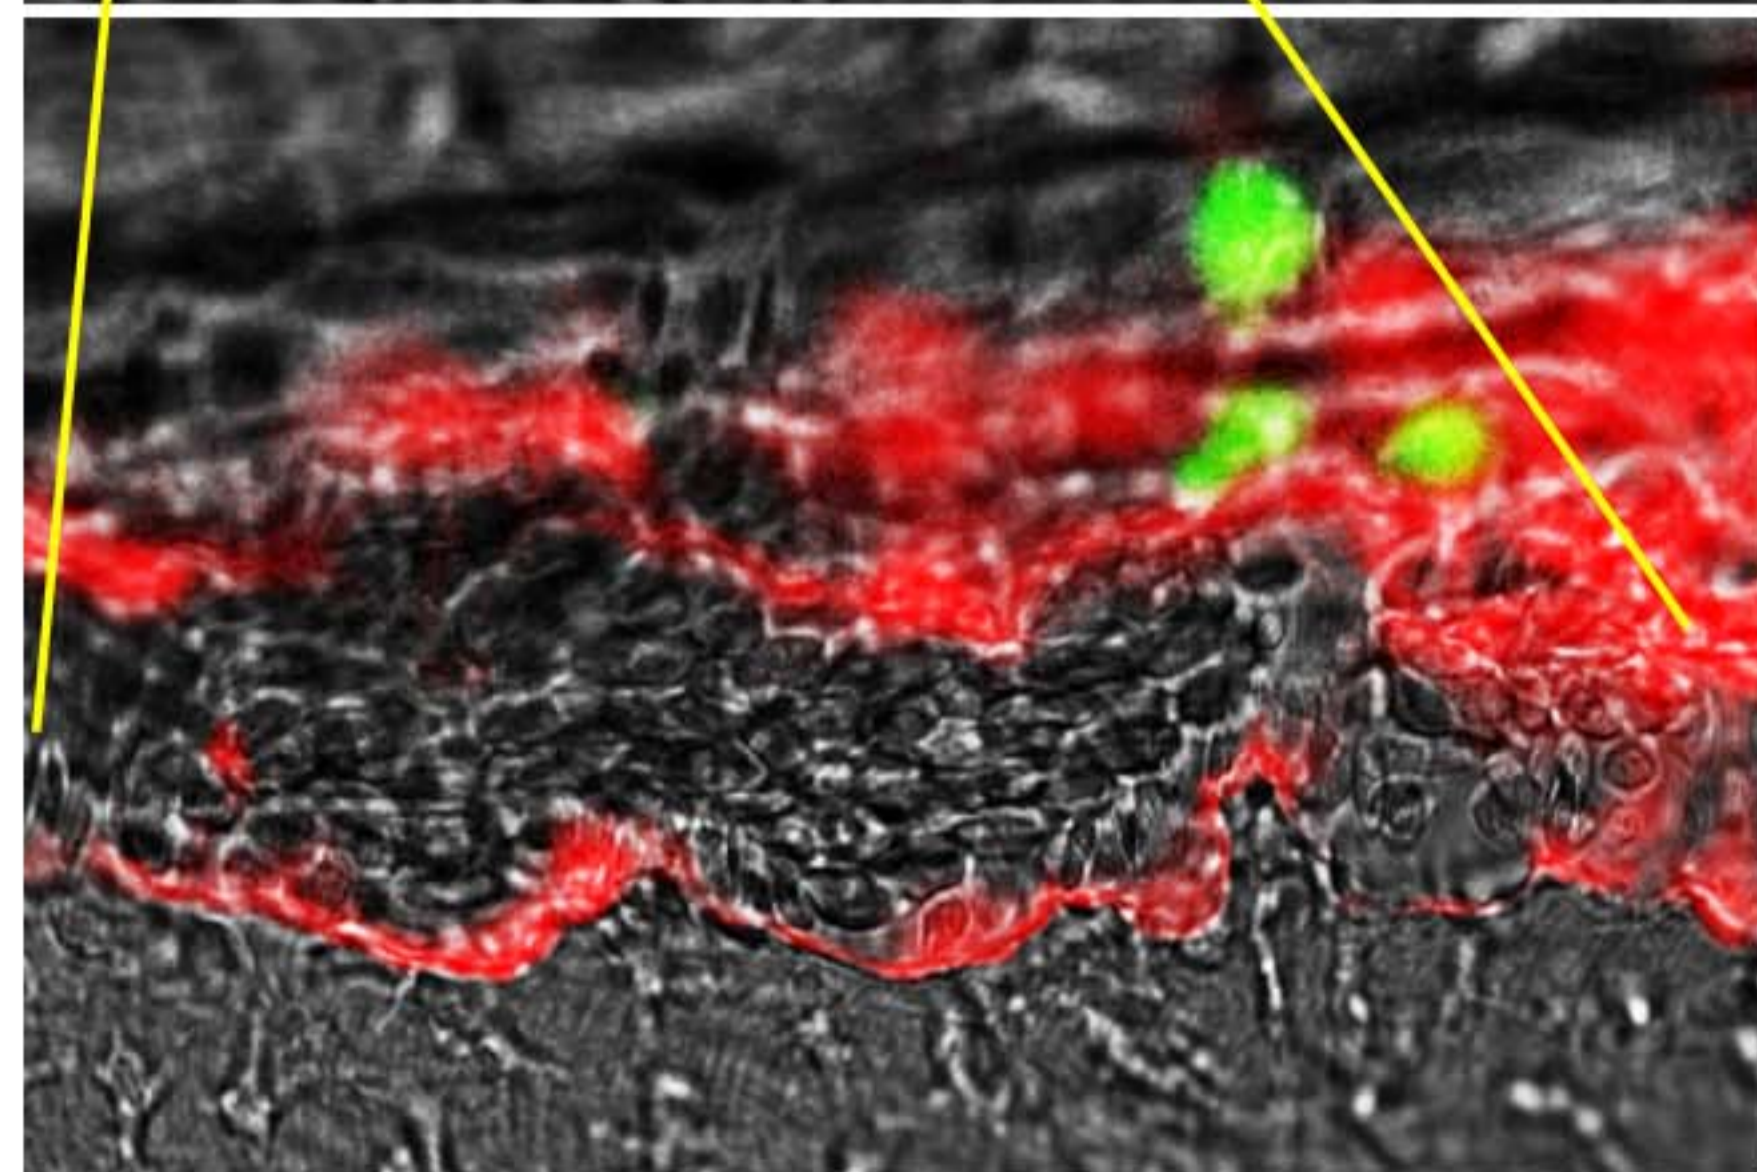

## B

The number of *cmyb:GFP<sup>+</sup>* cells in CHT

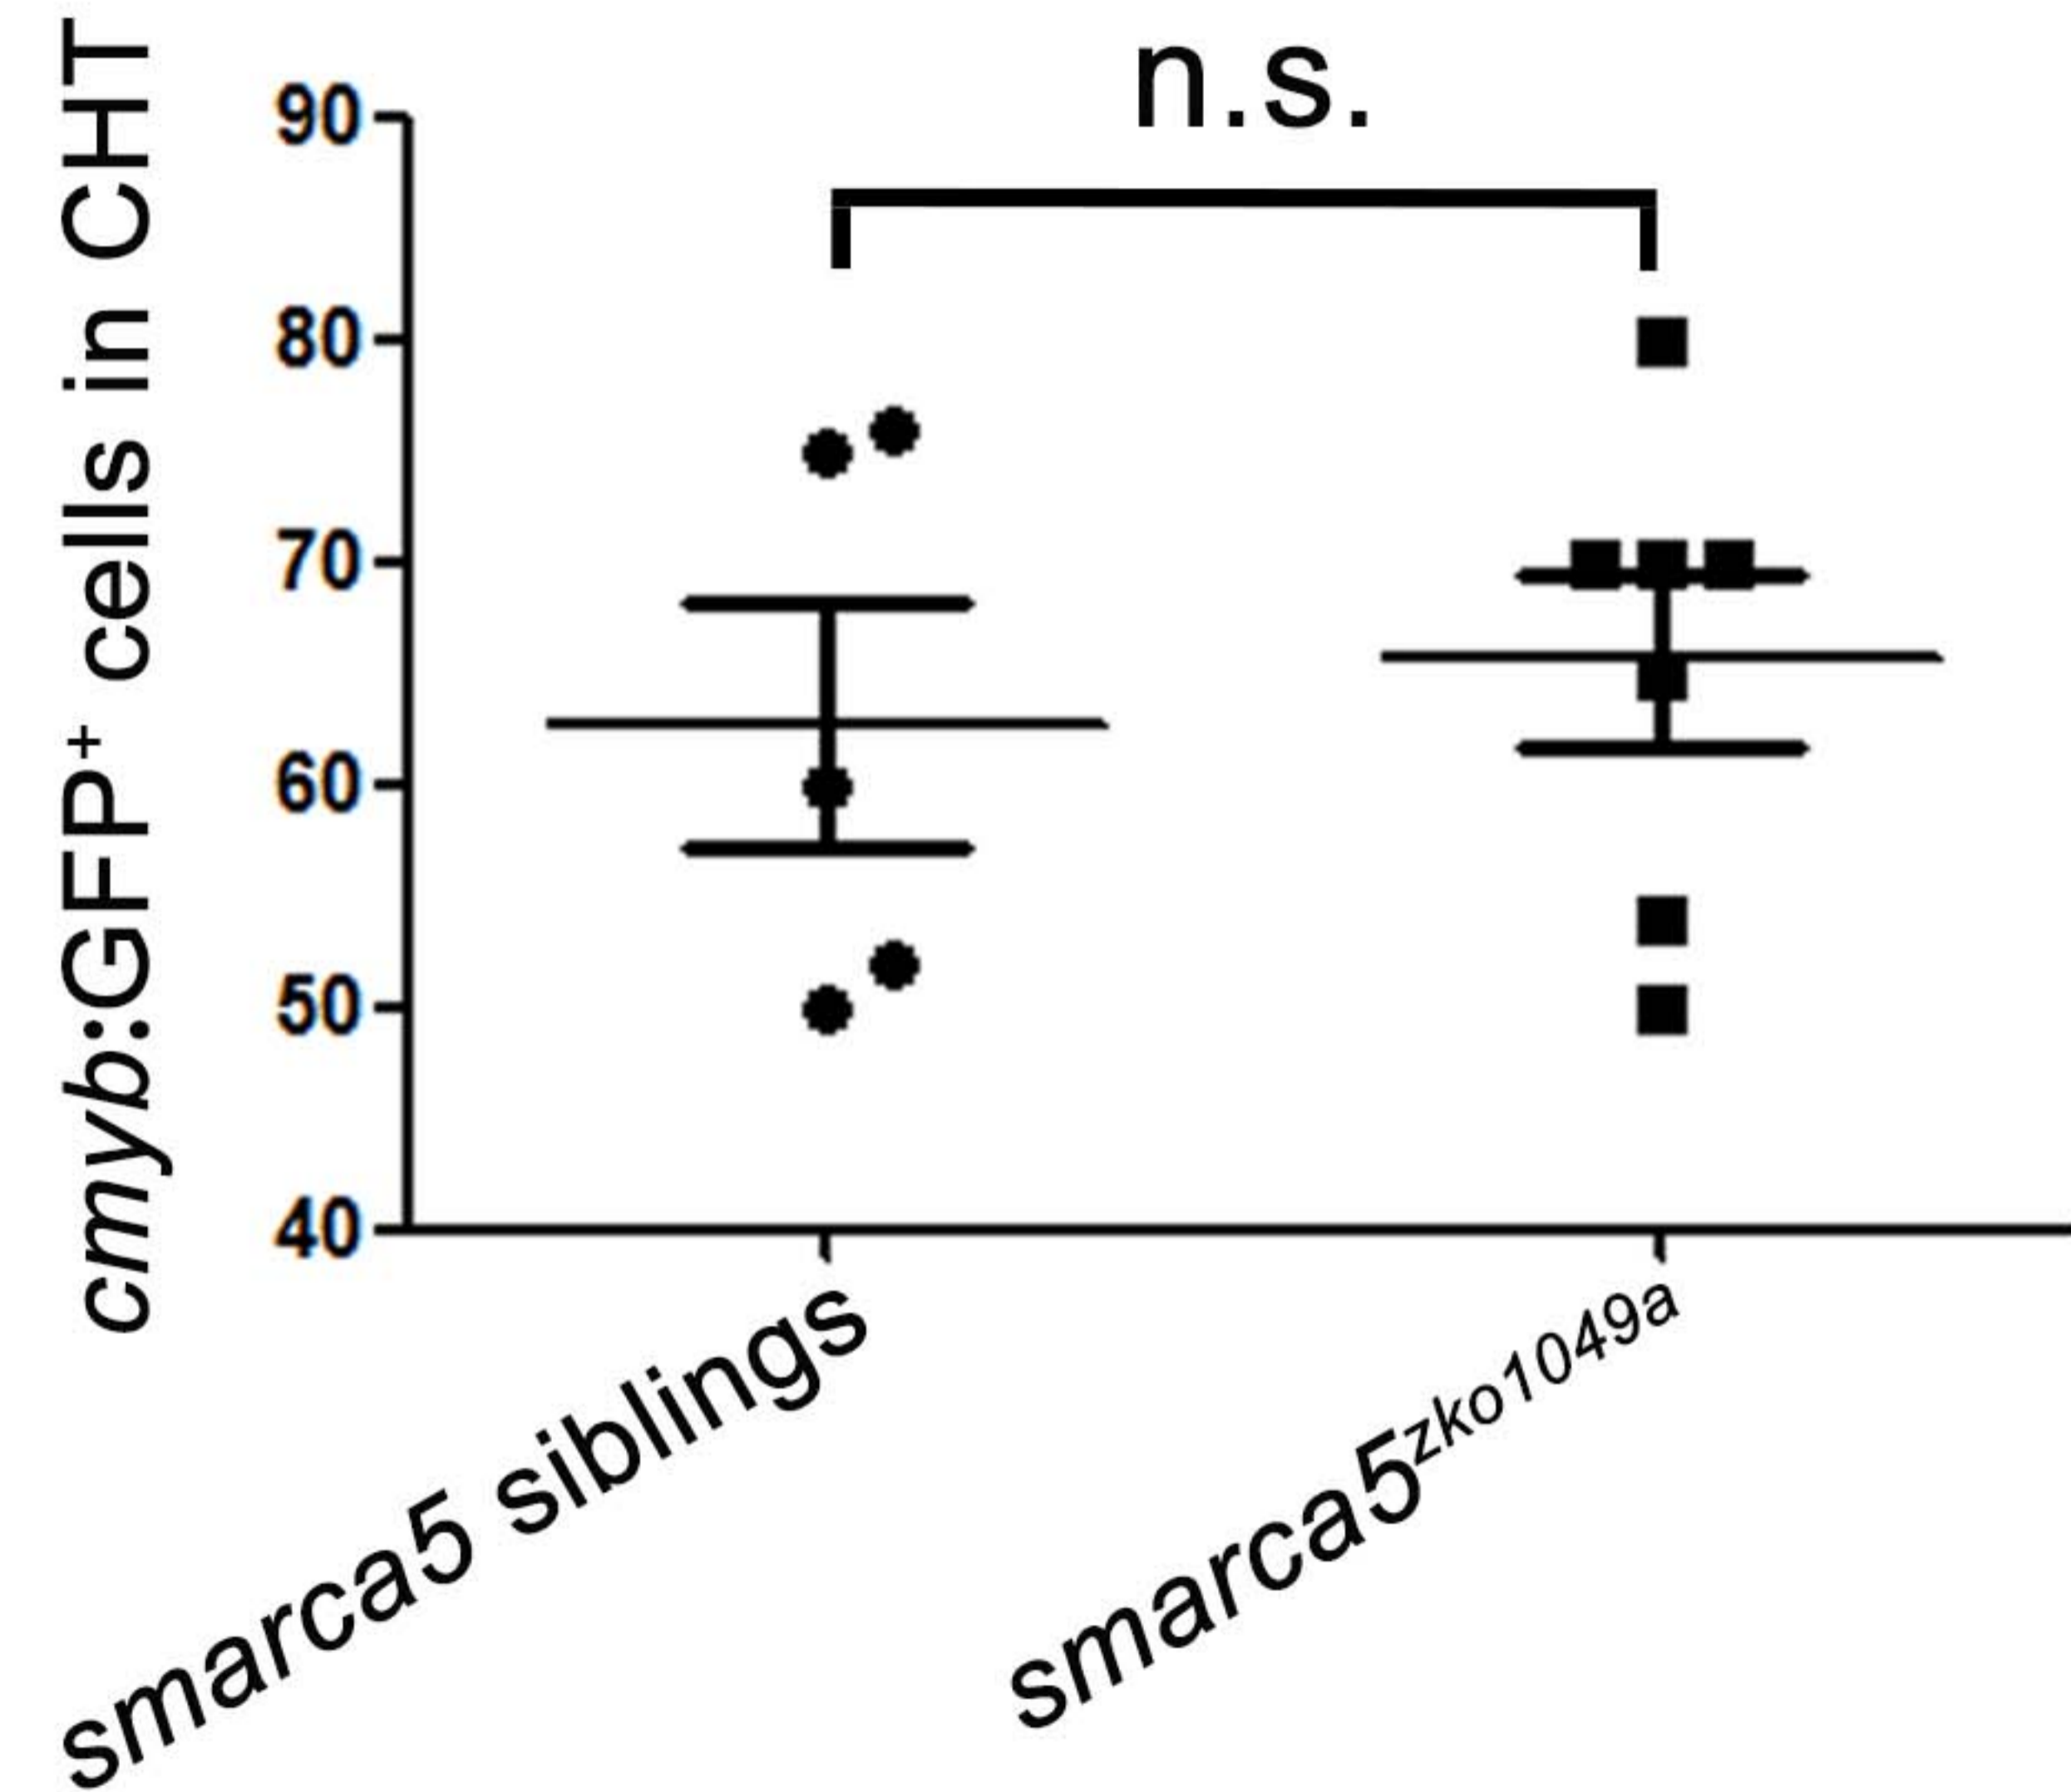



**Figure S3**

**A**

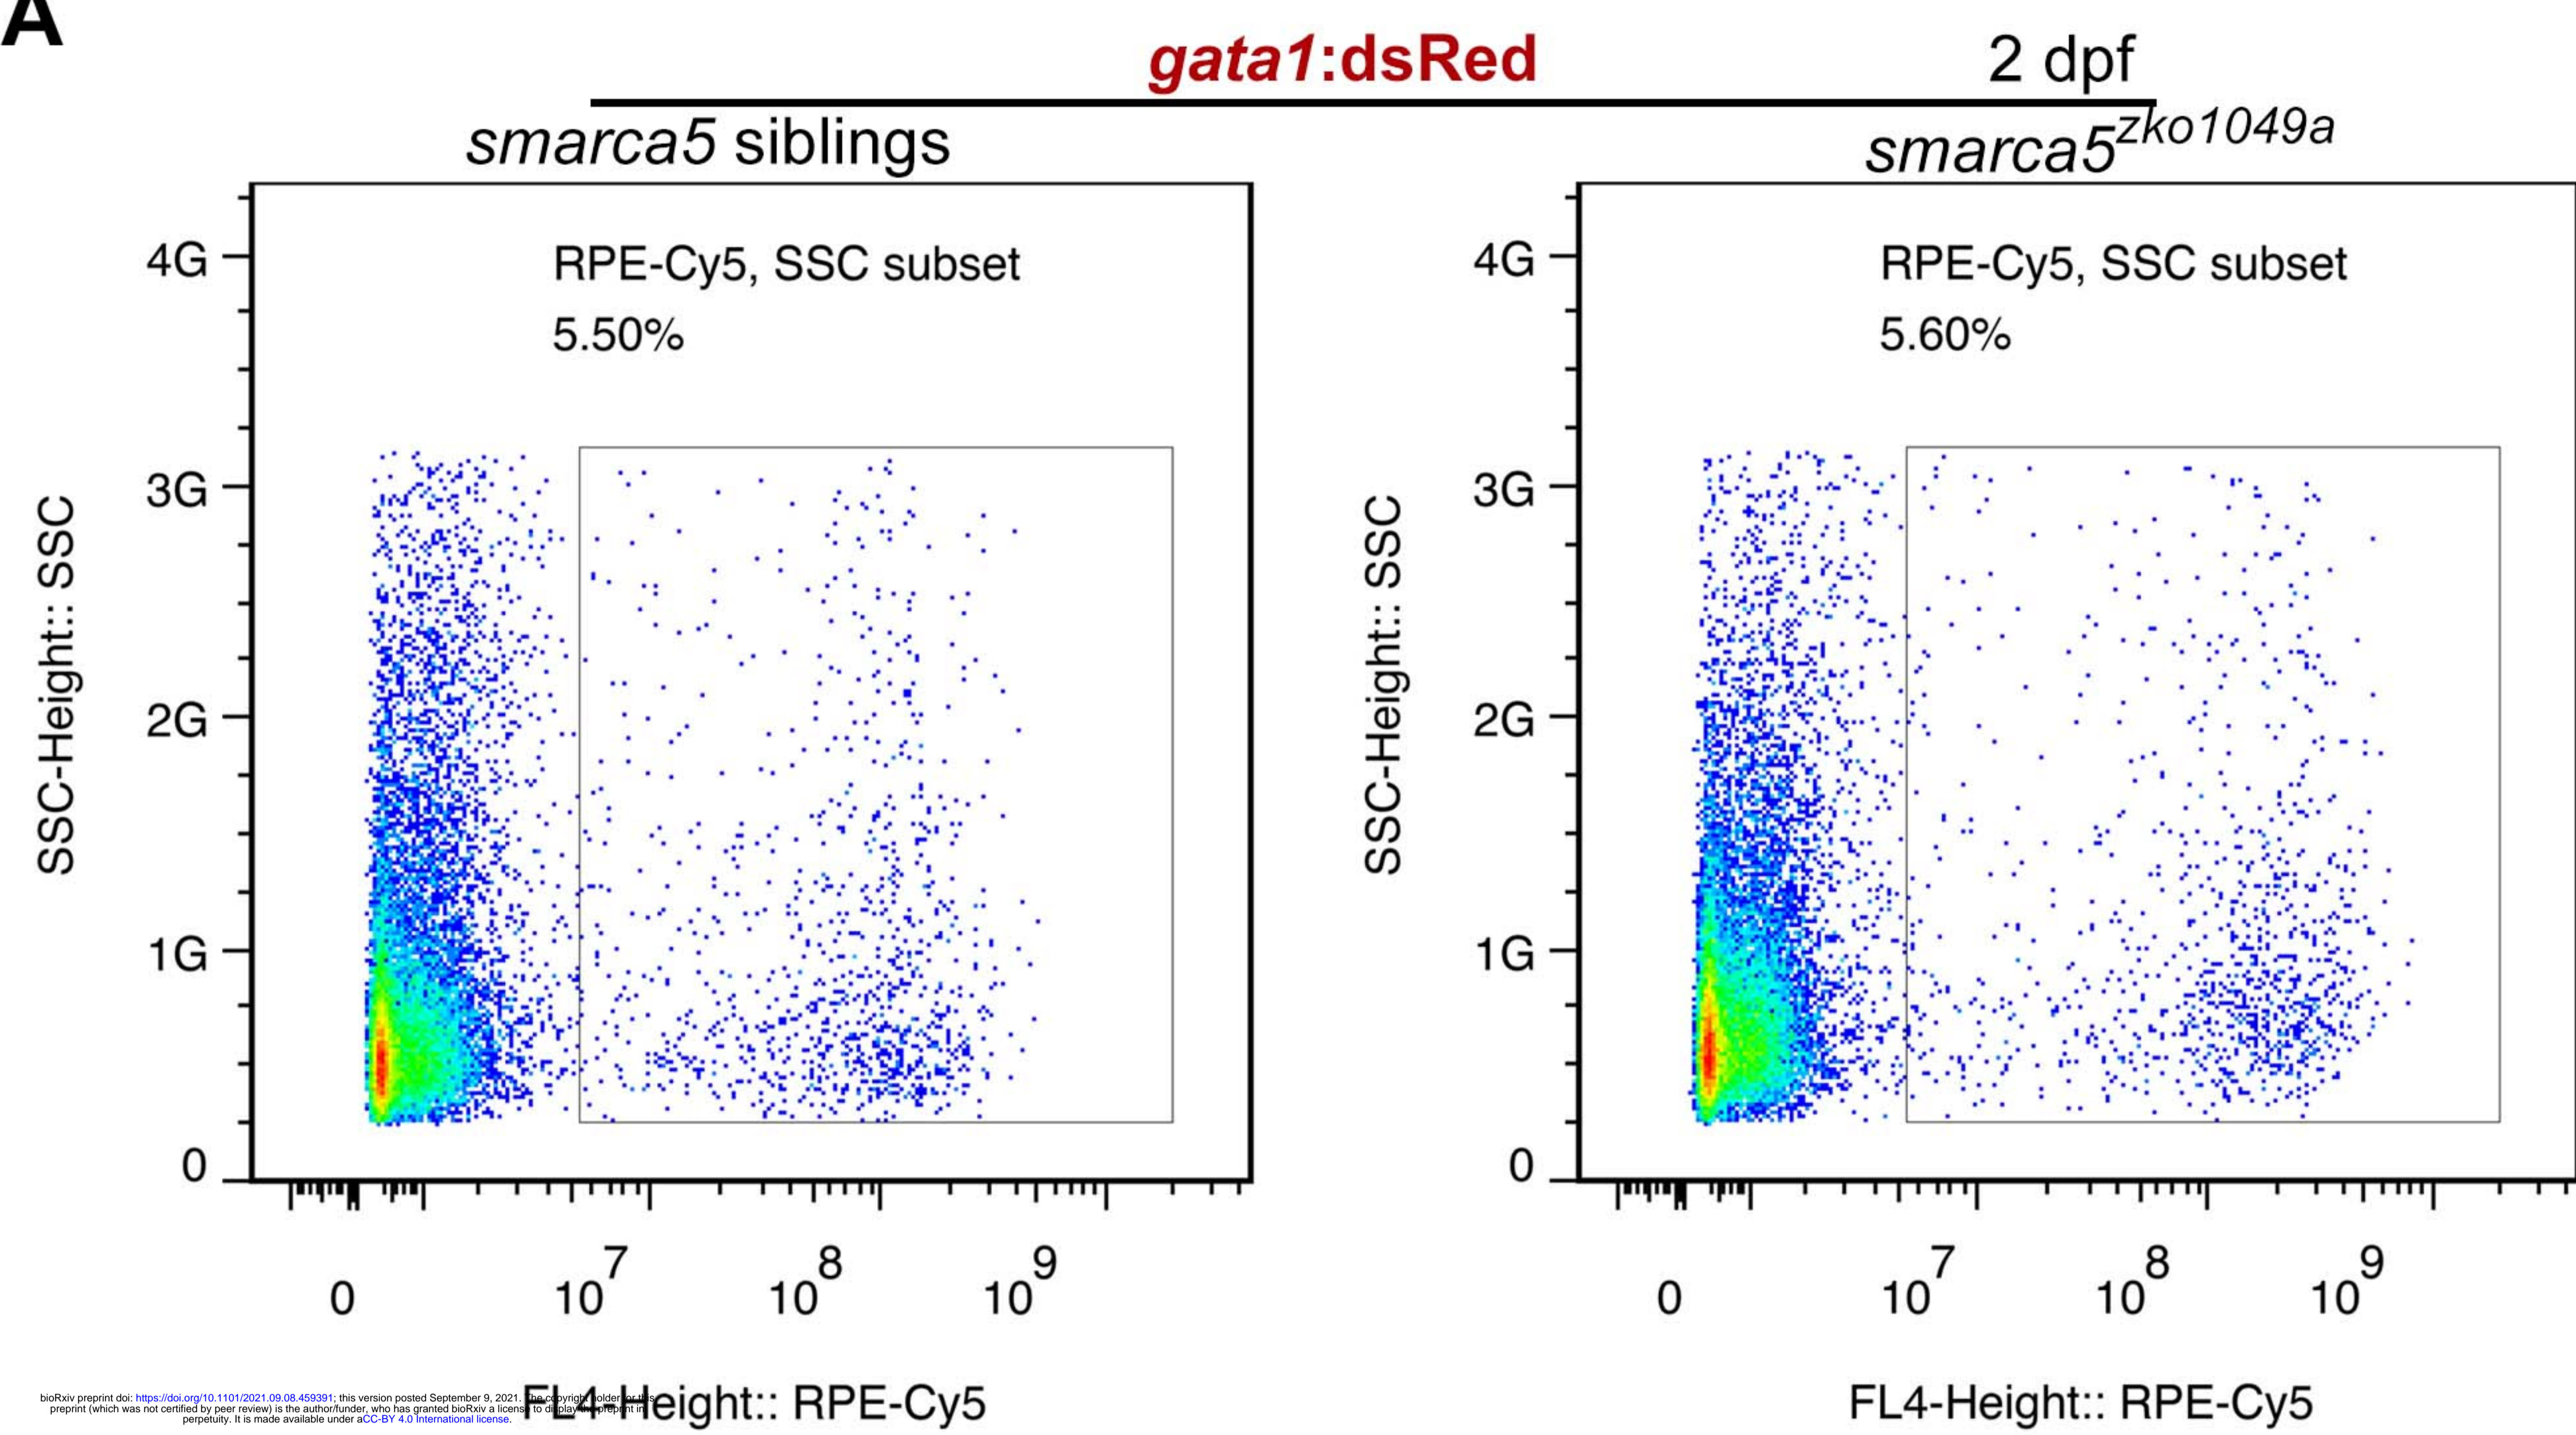

**B**

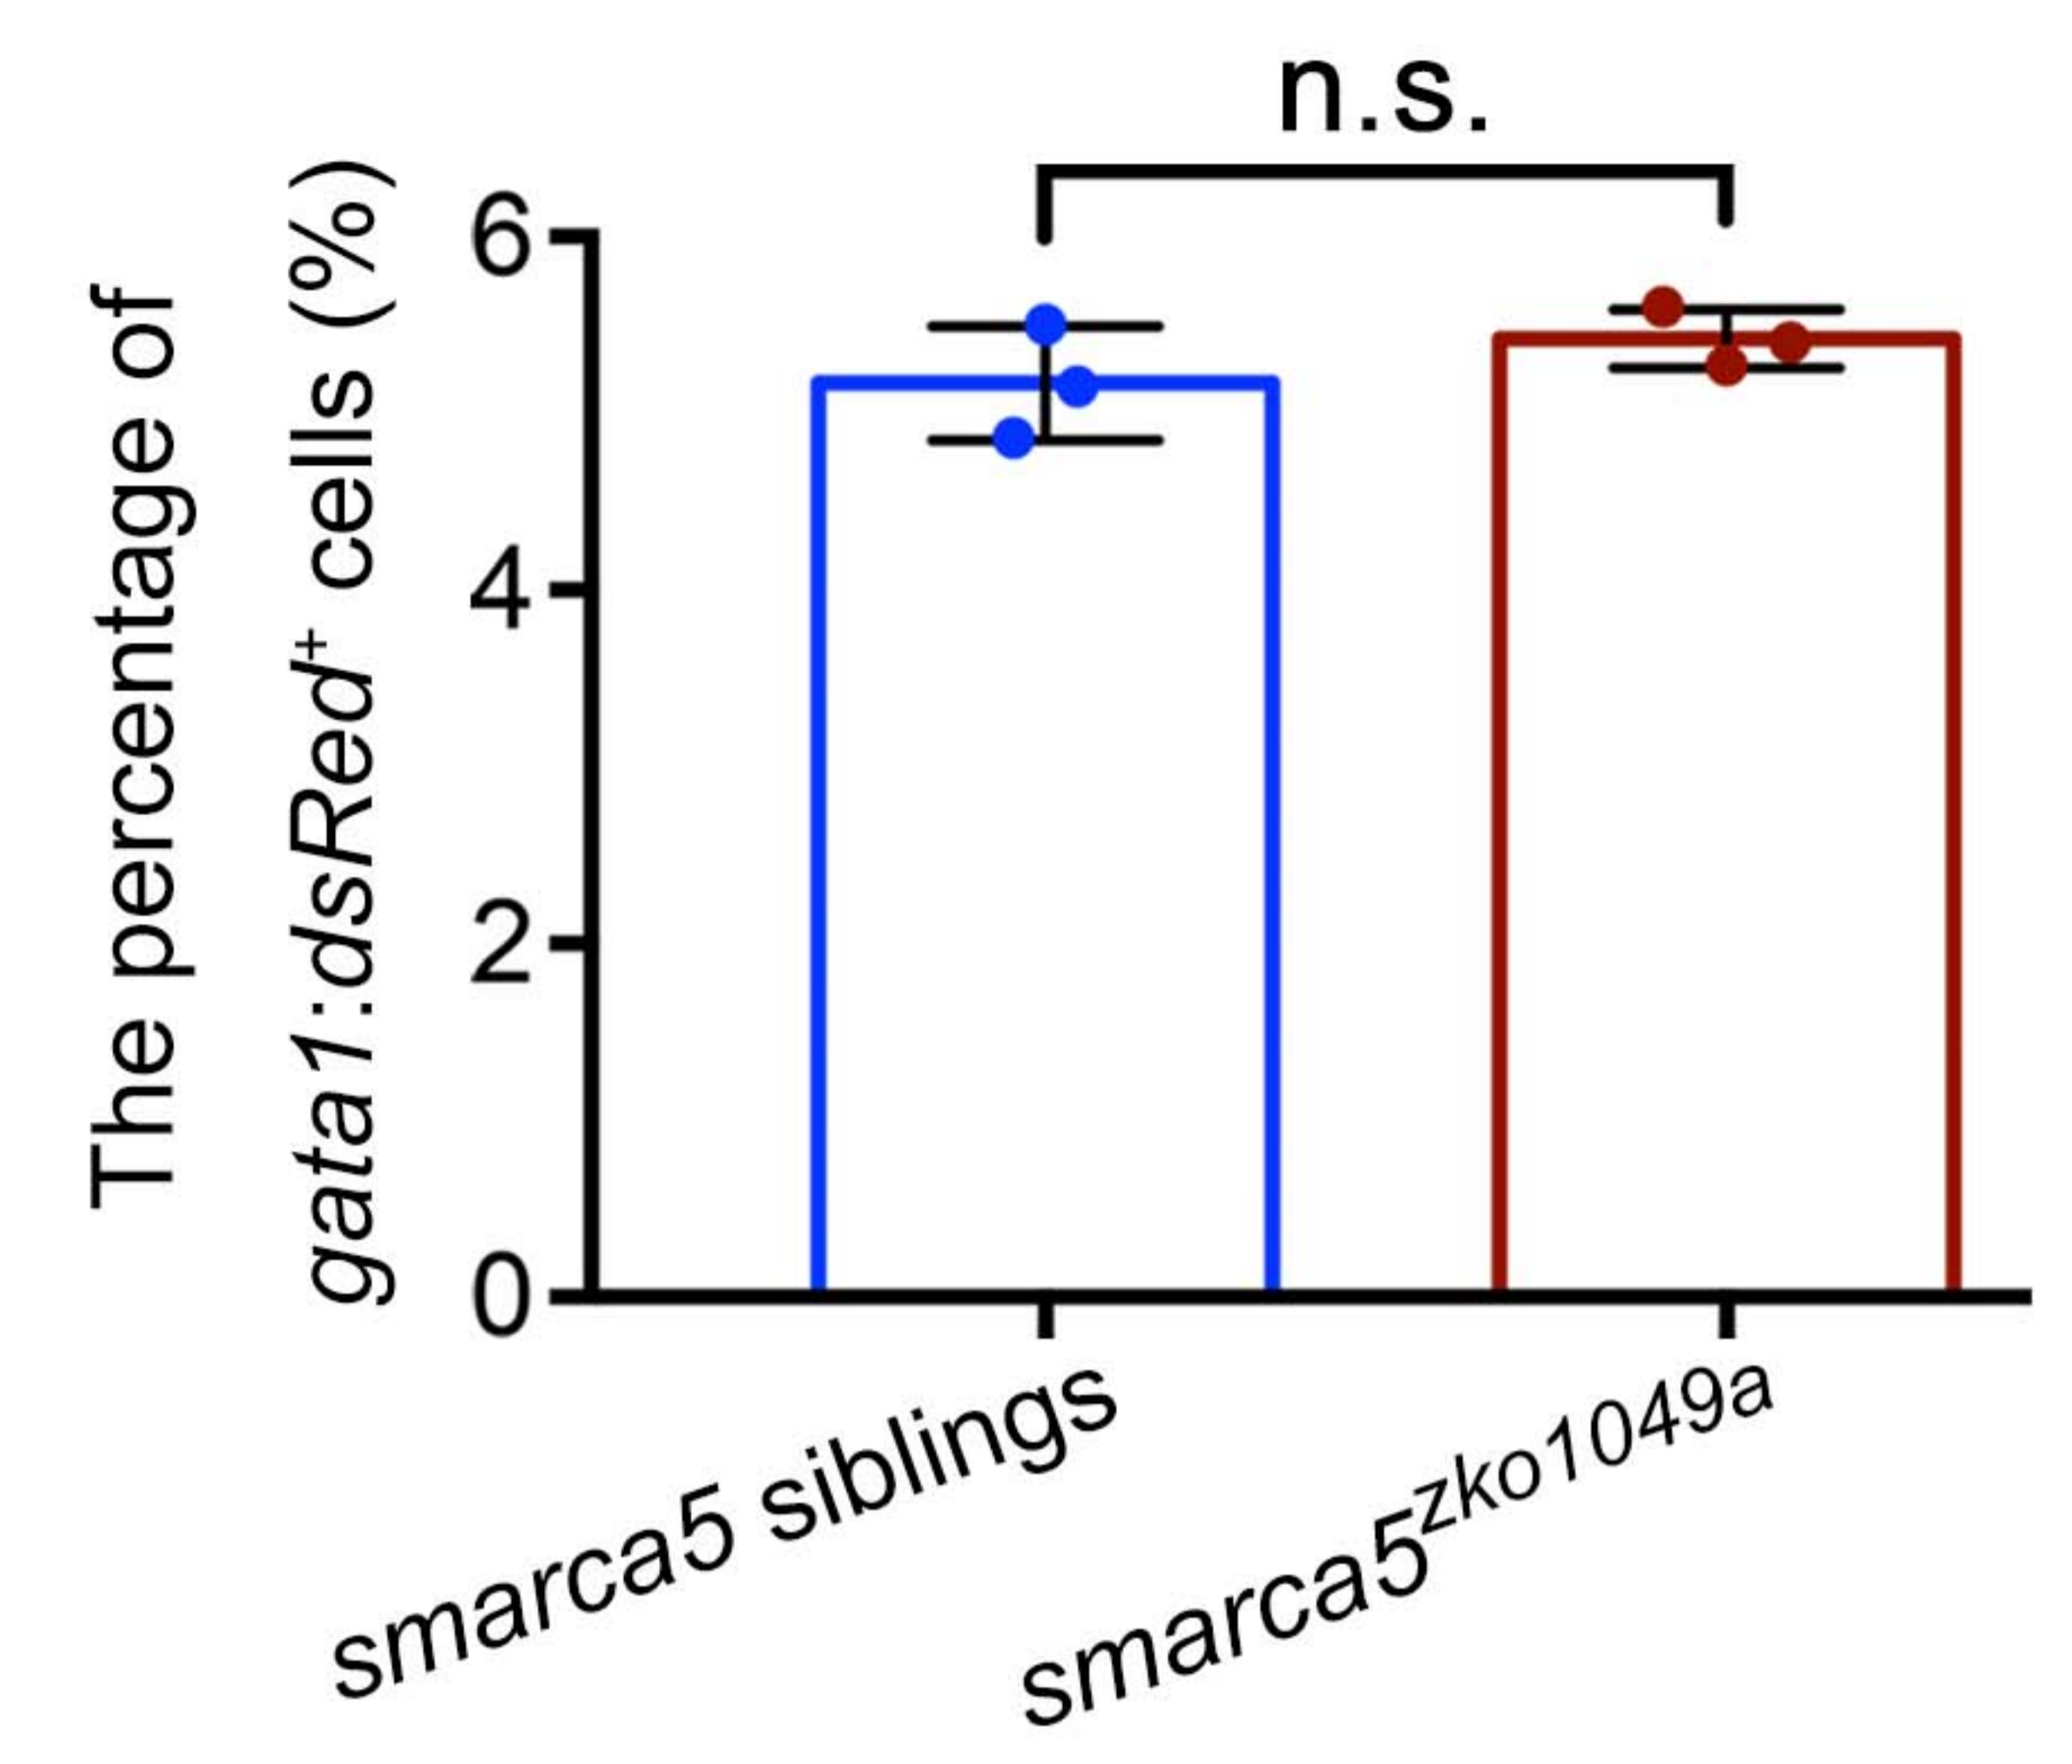

**C**

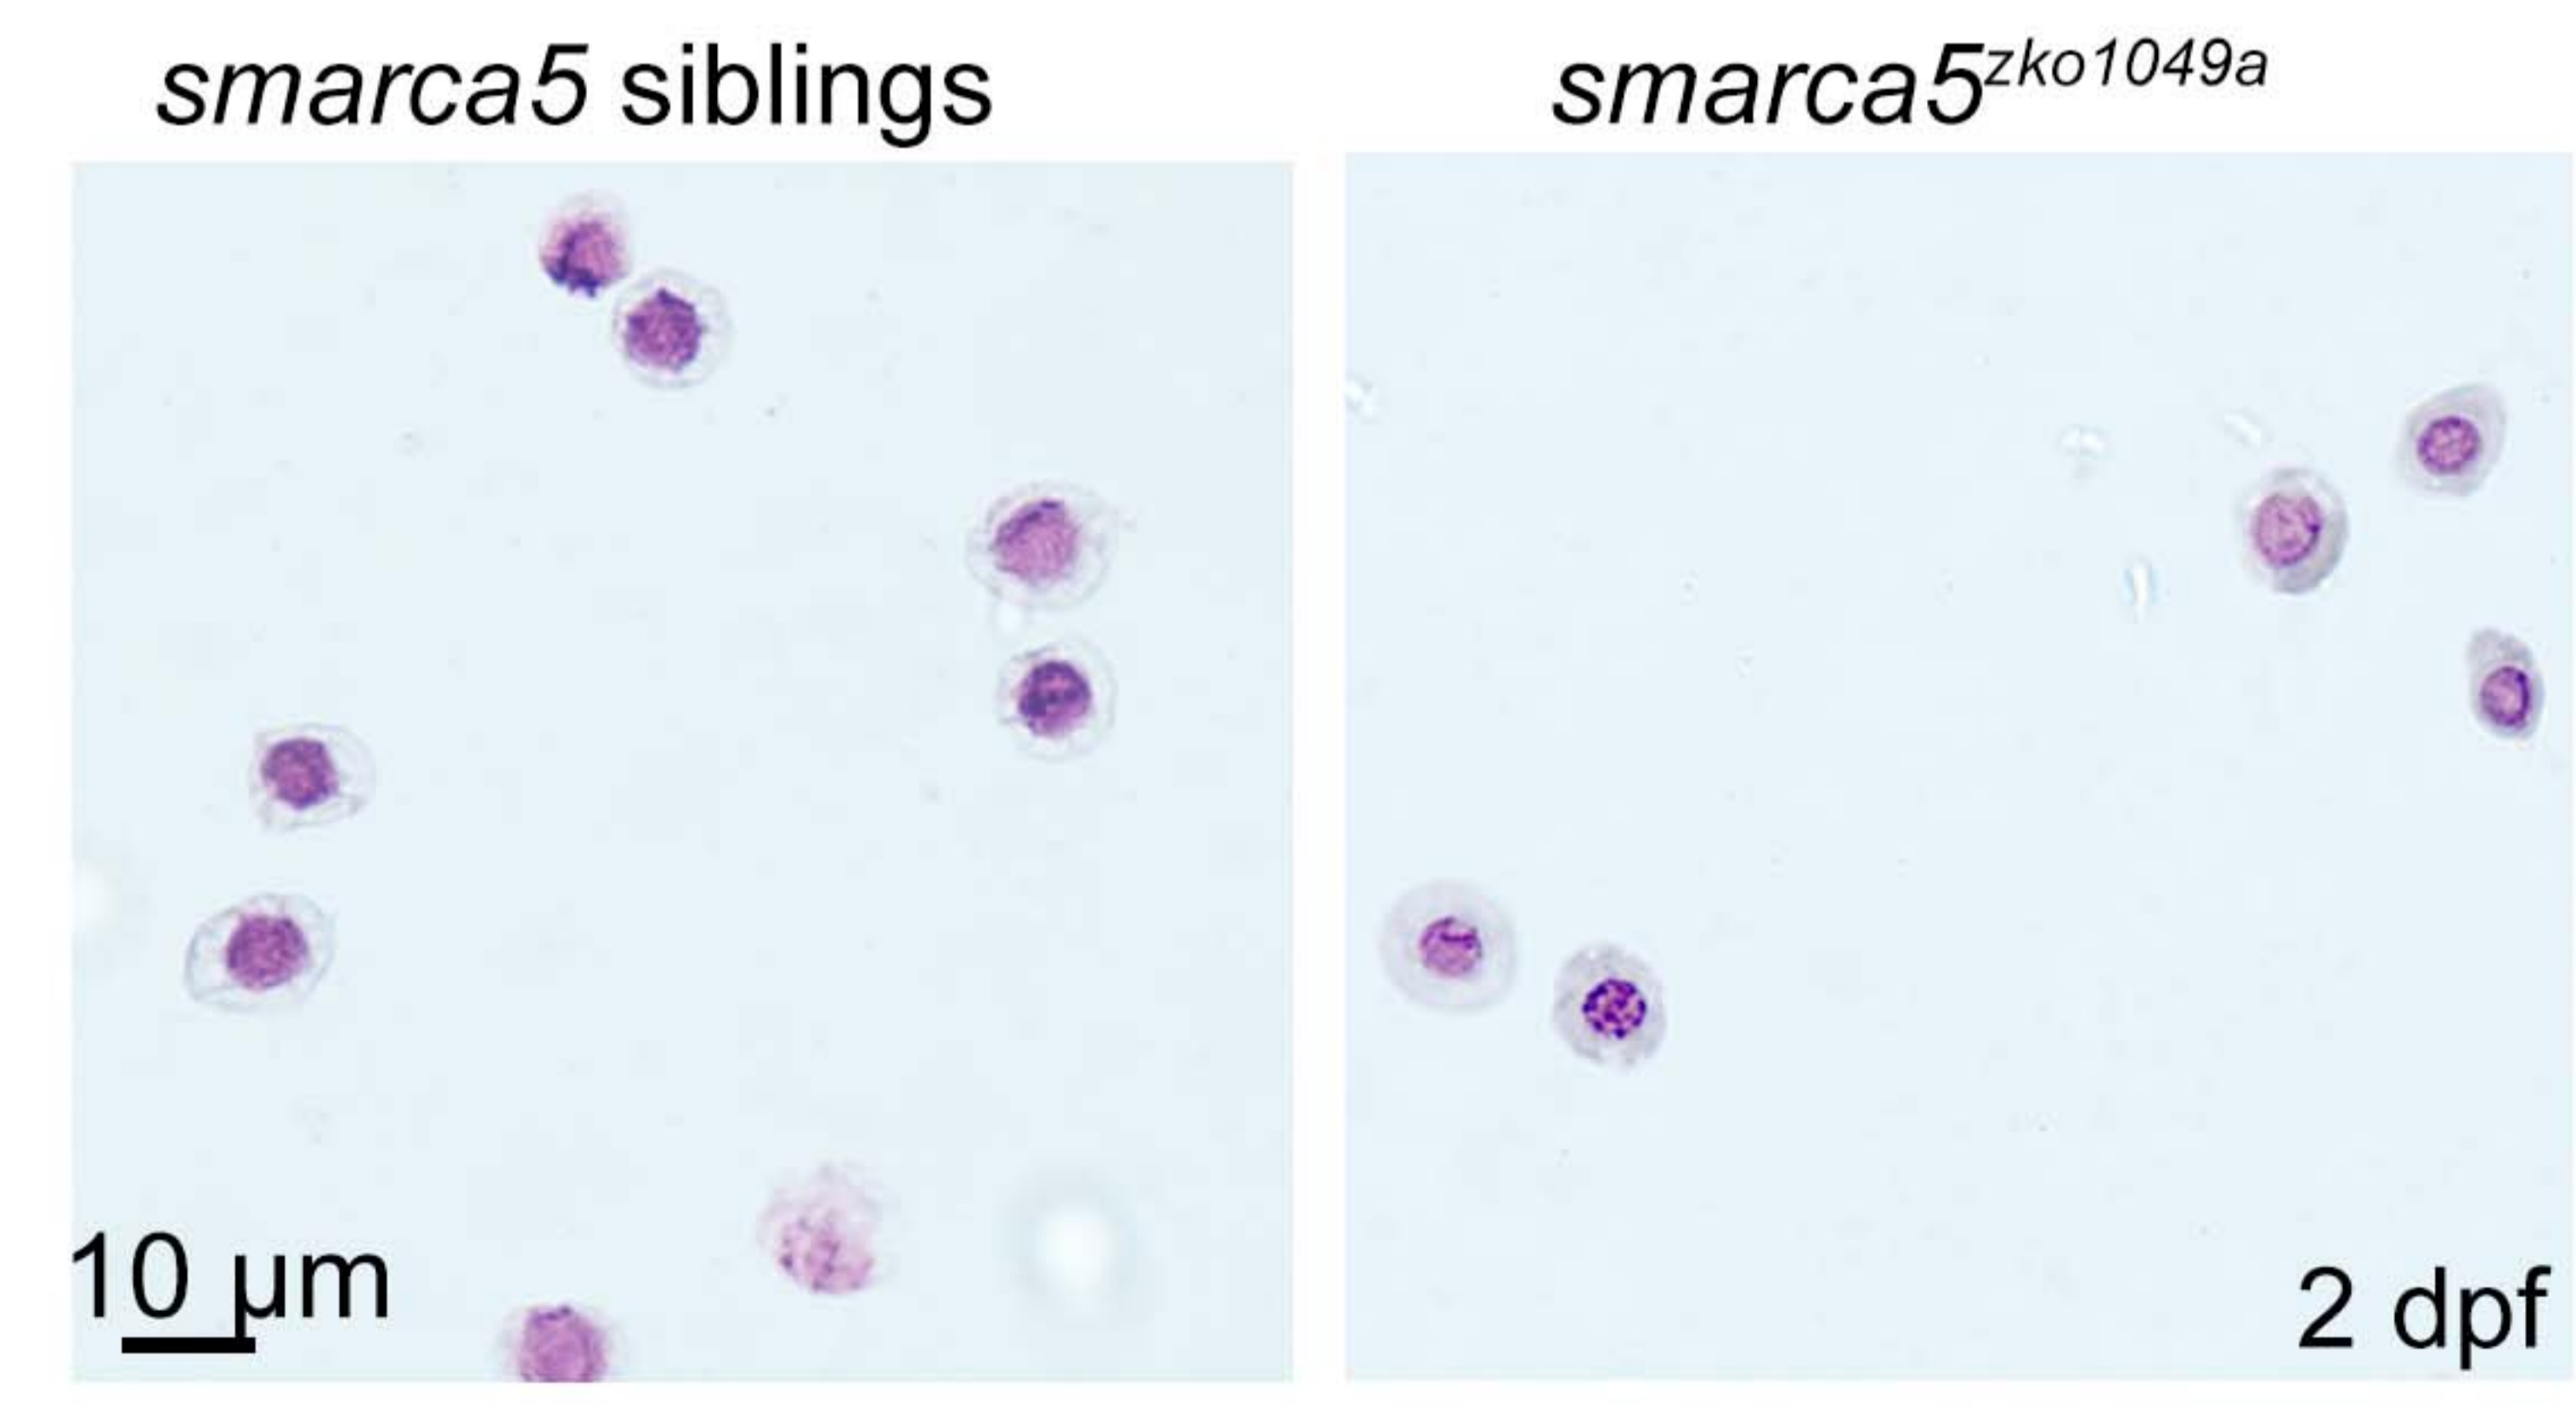

**D**

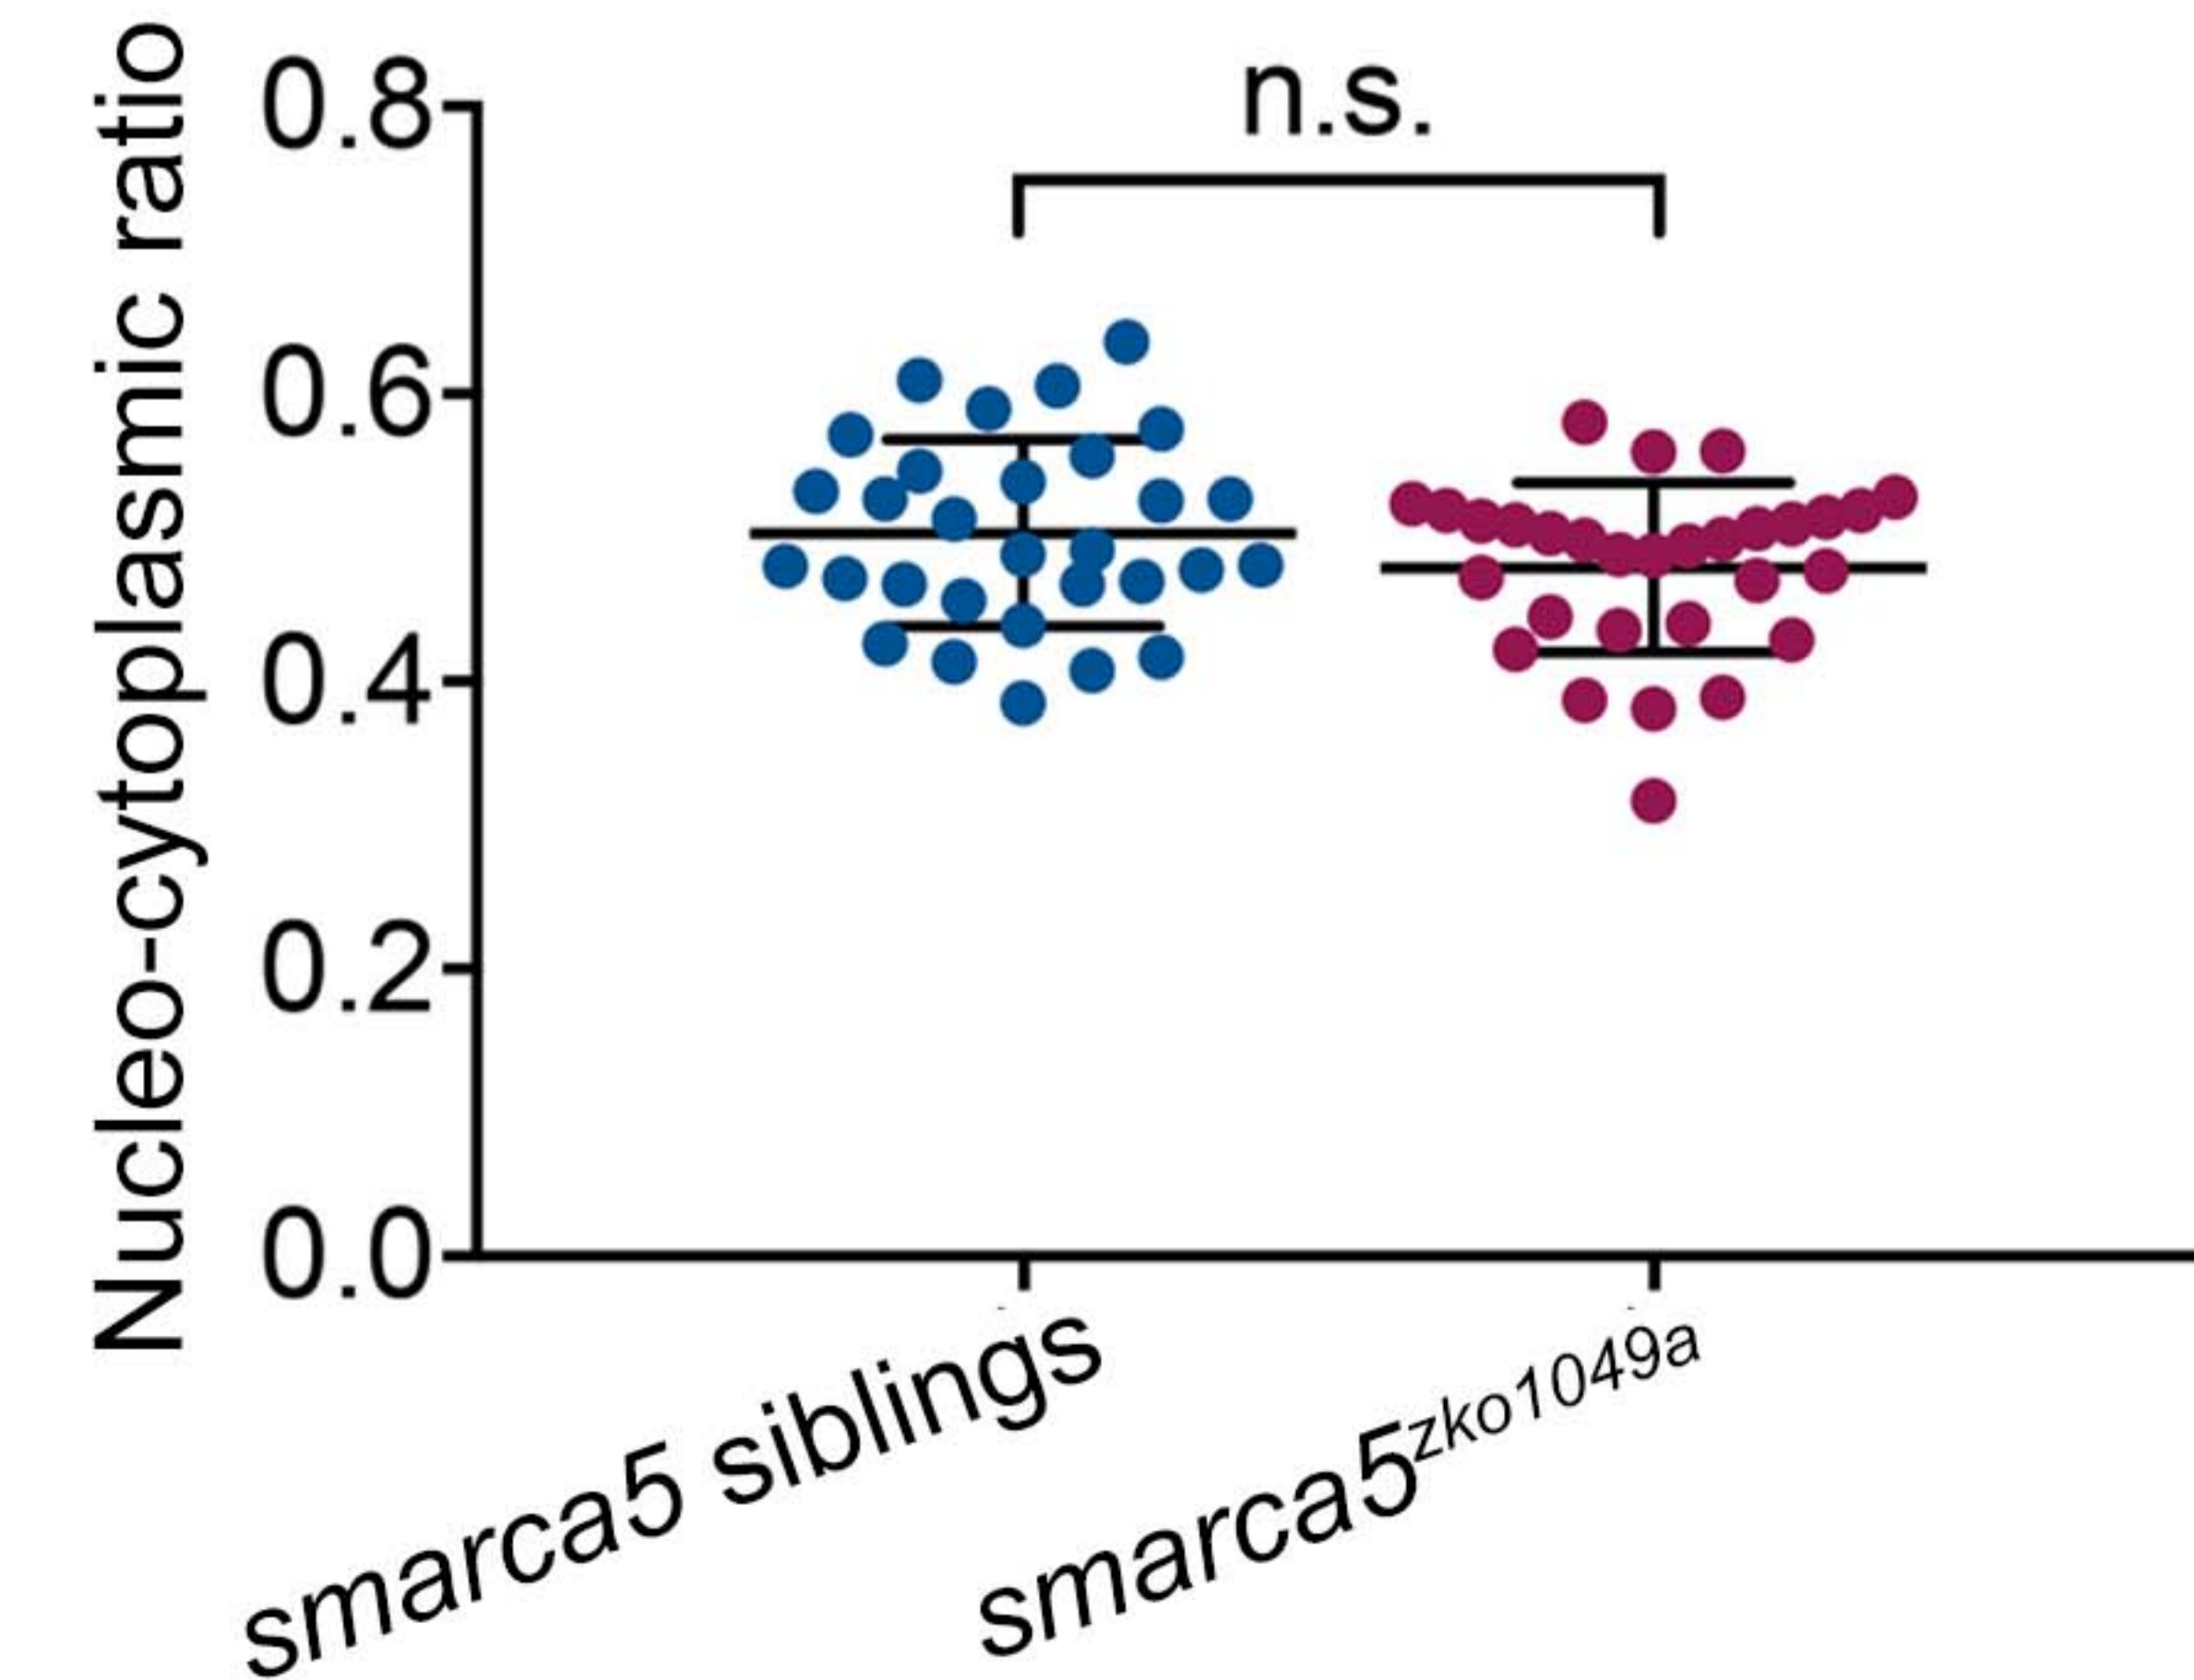

**Figure S4**

**A**

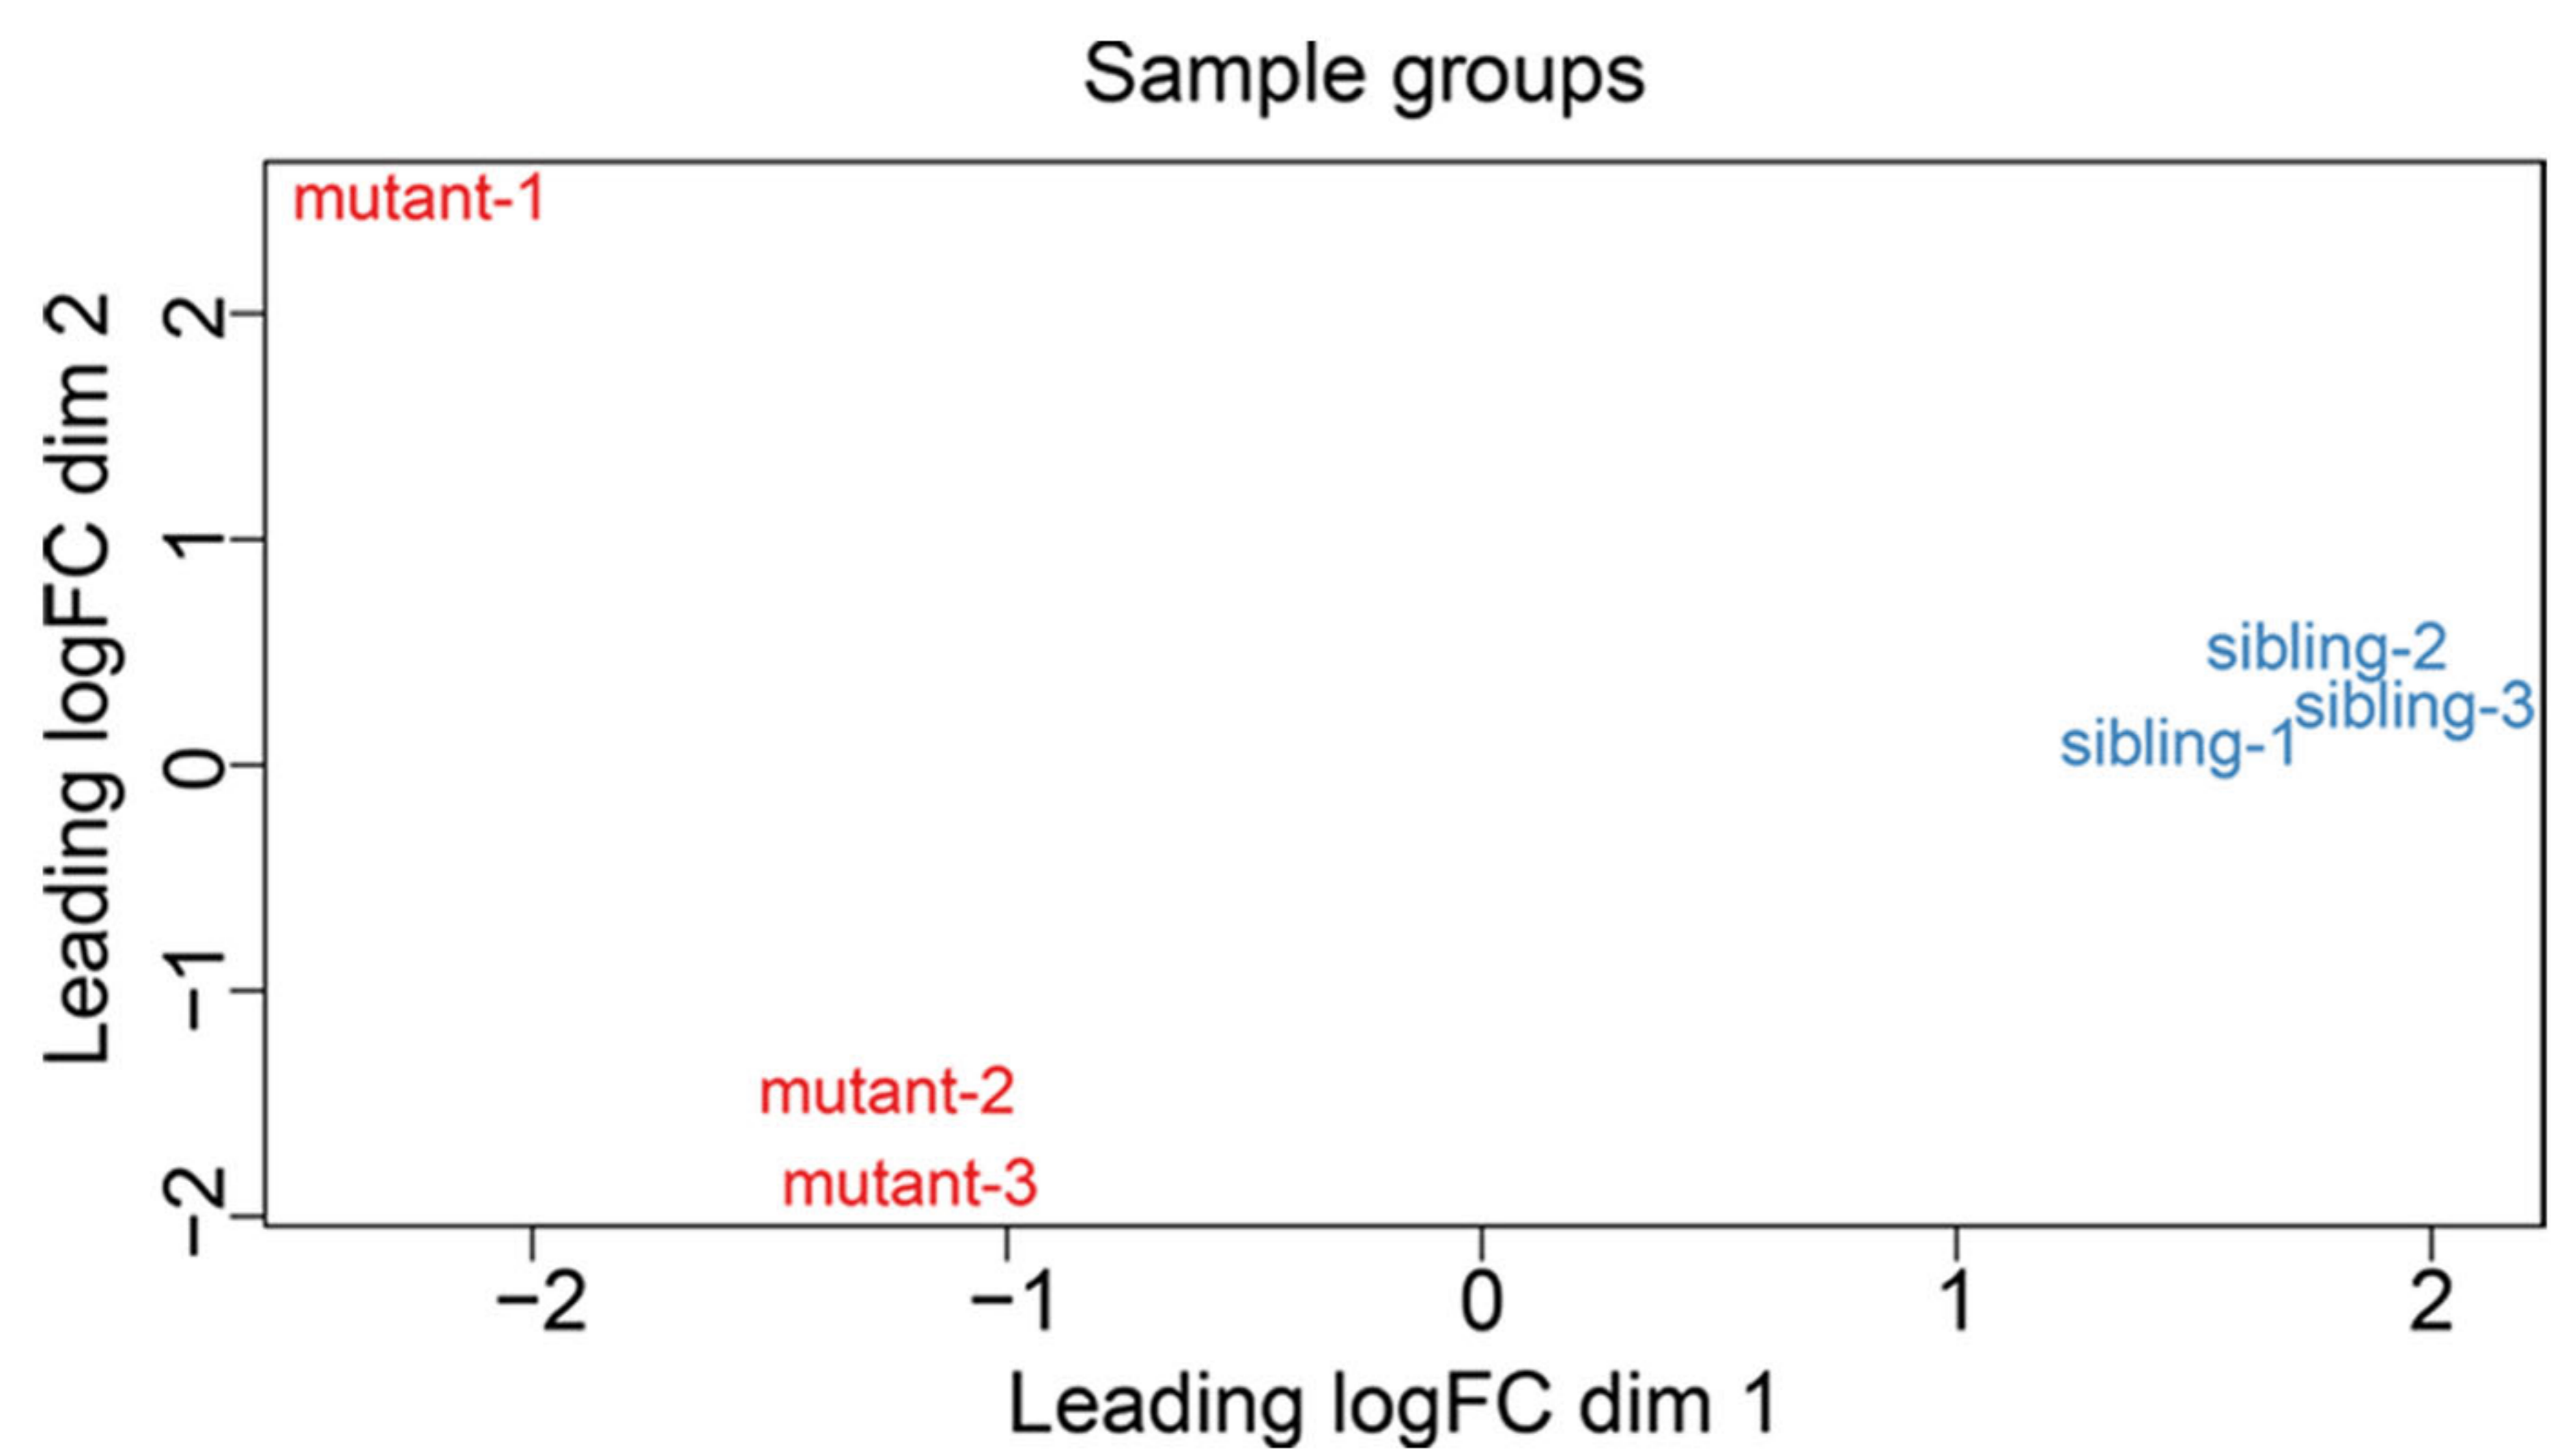

**B**

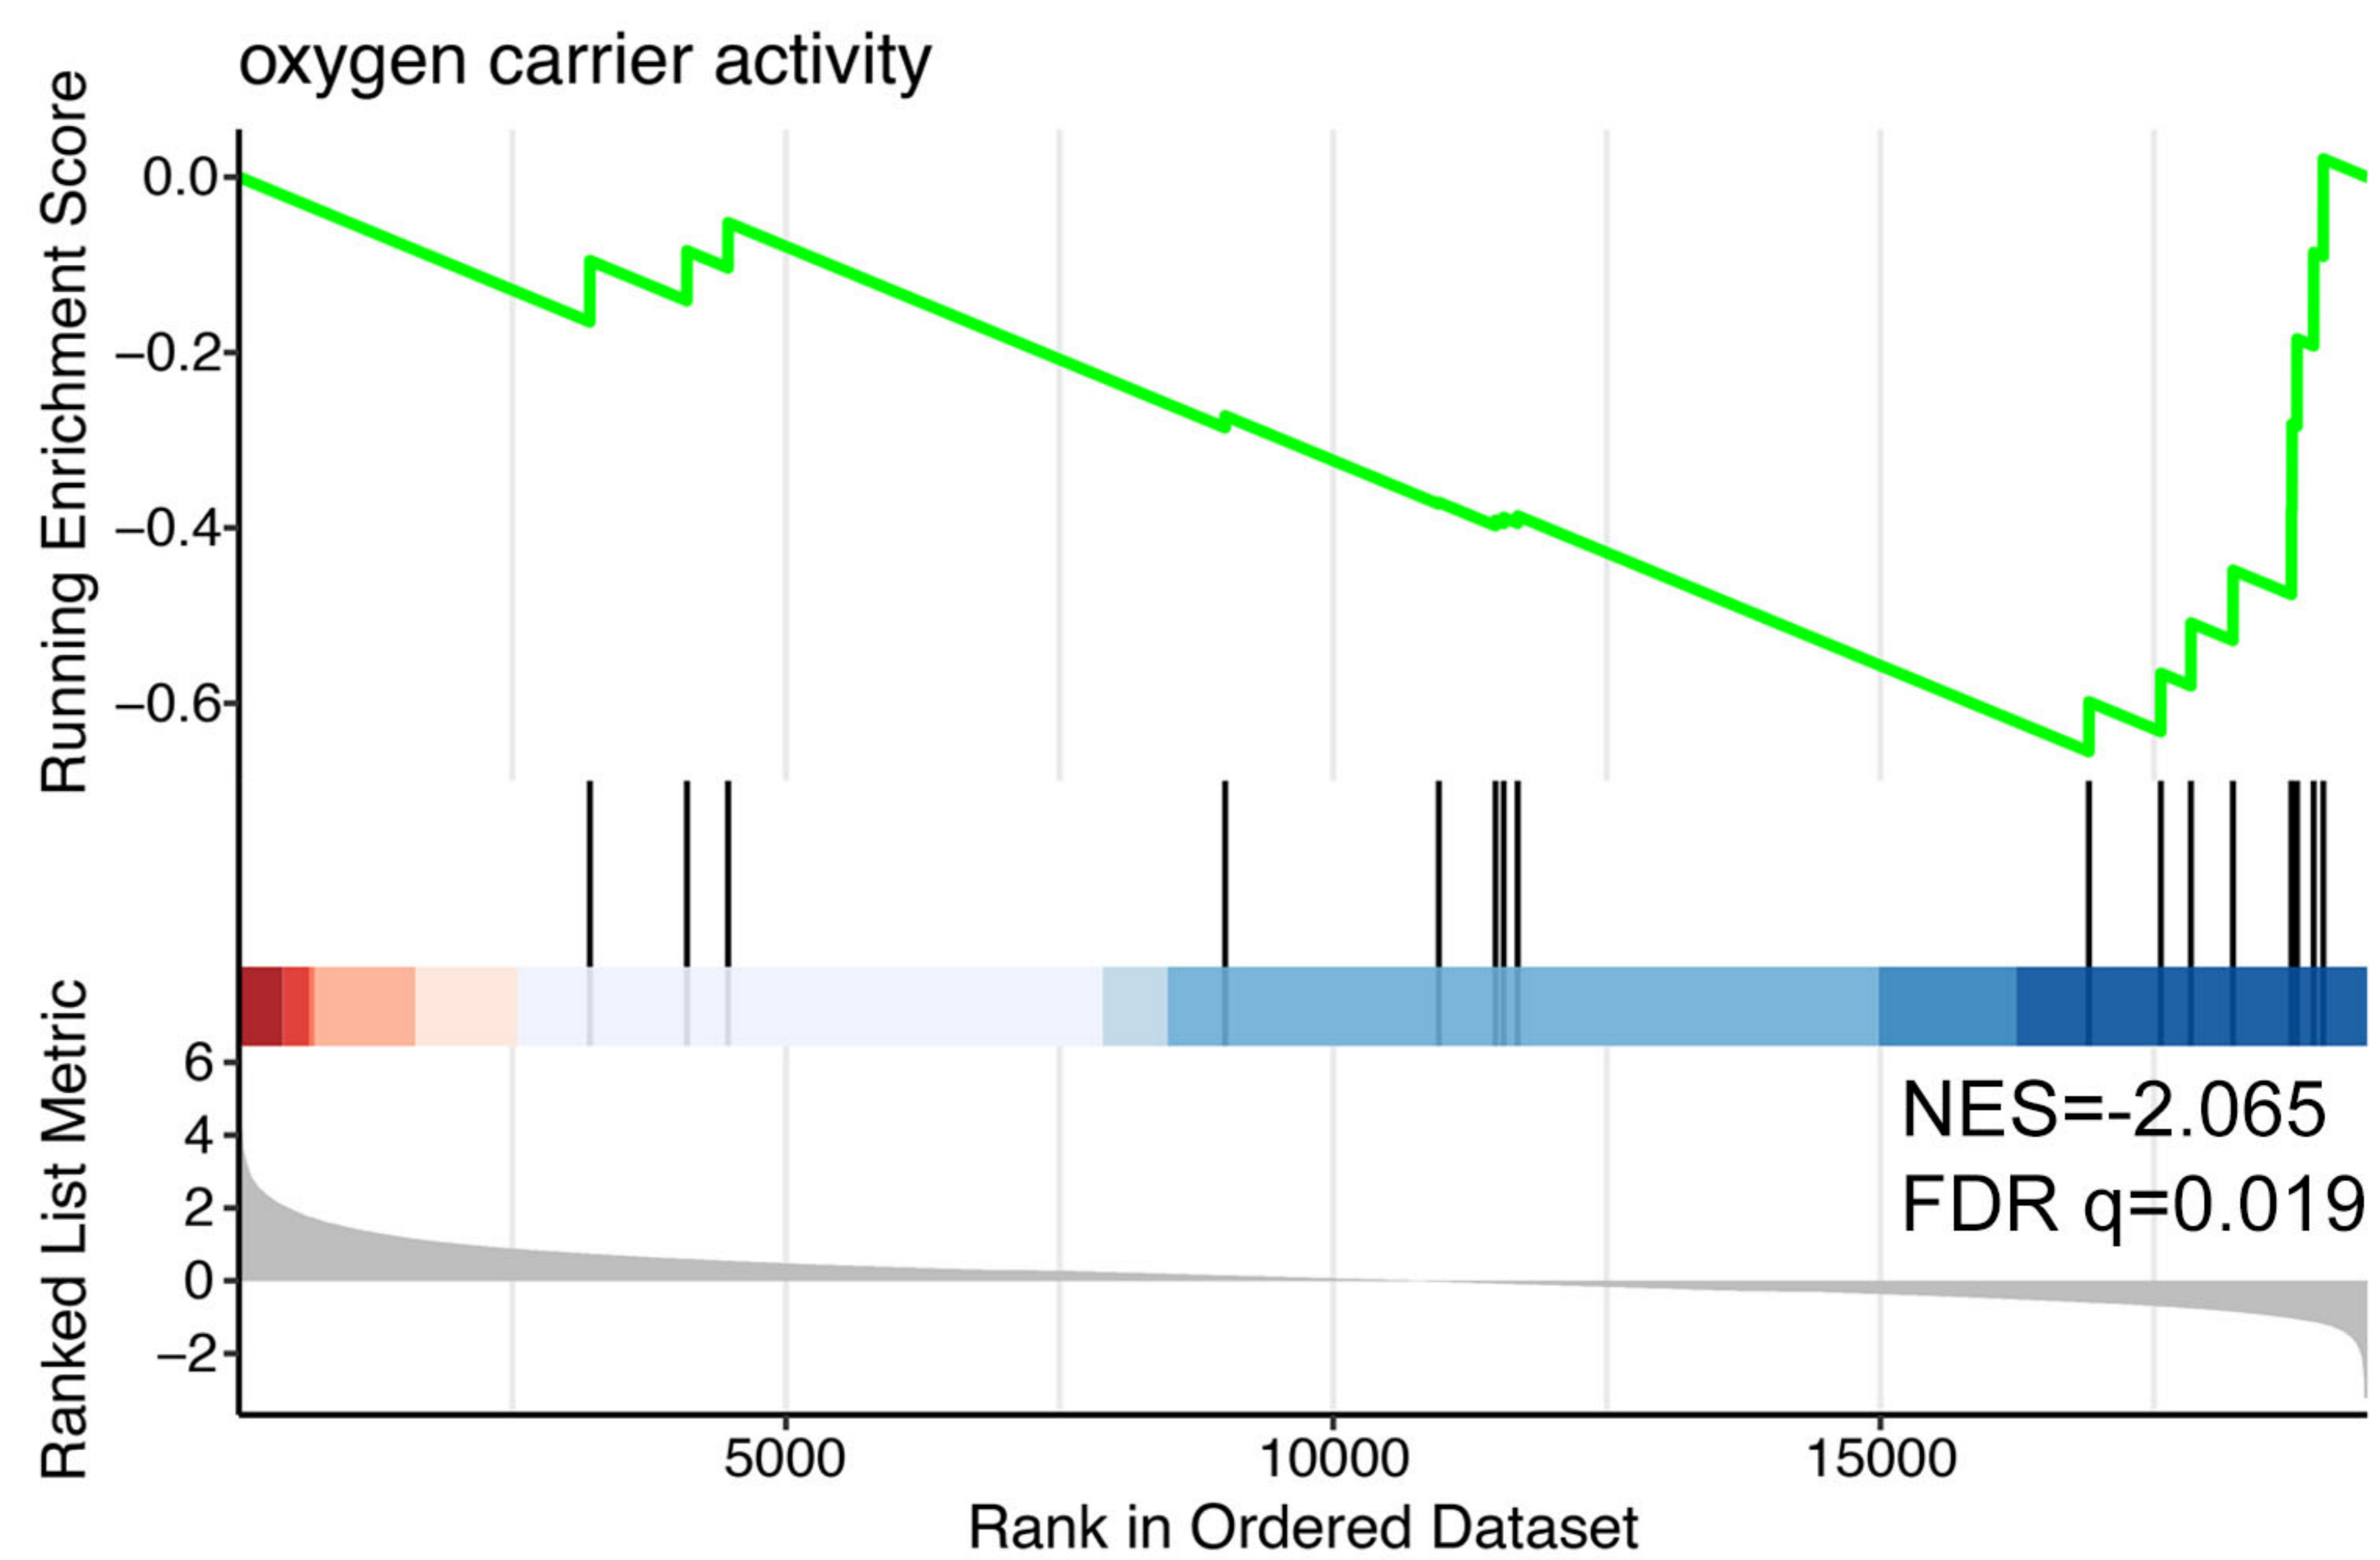

**C**

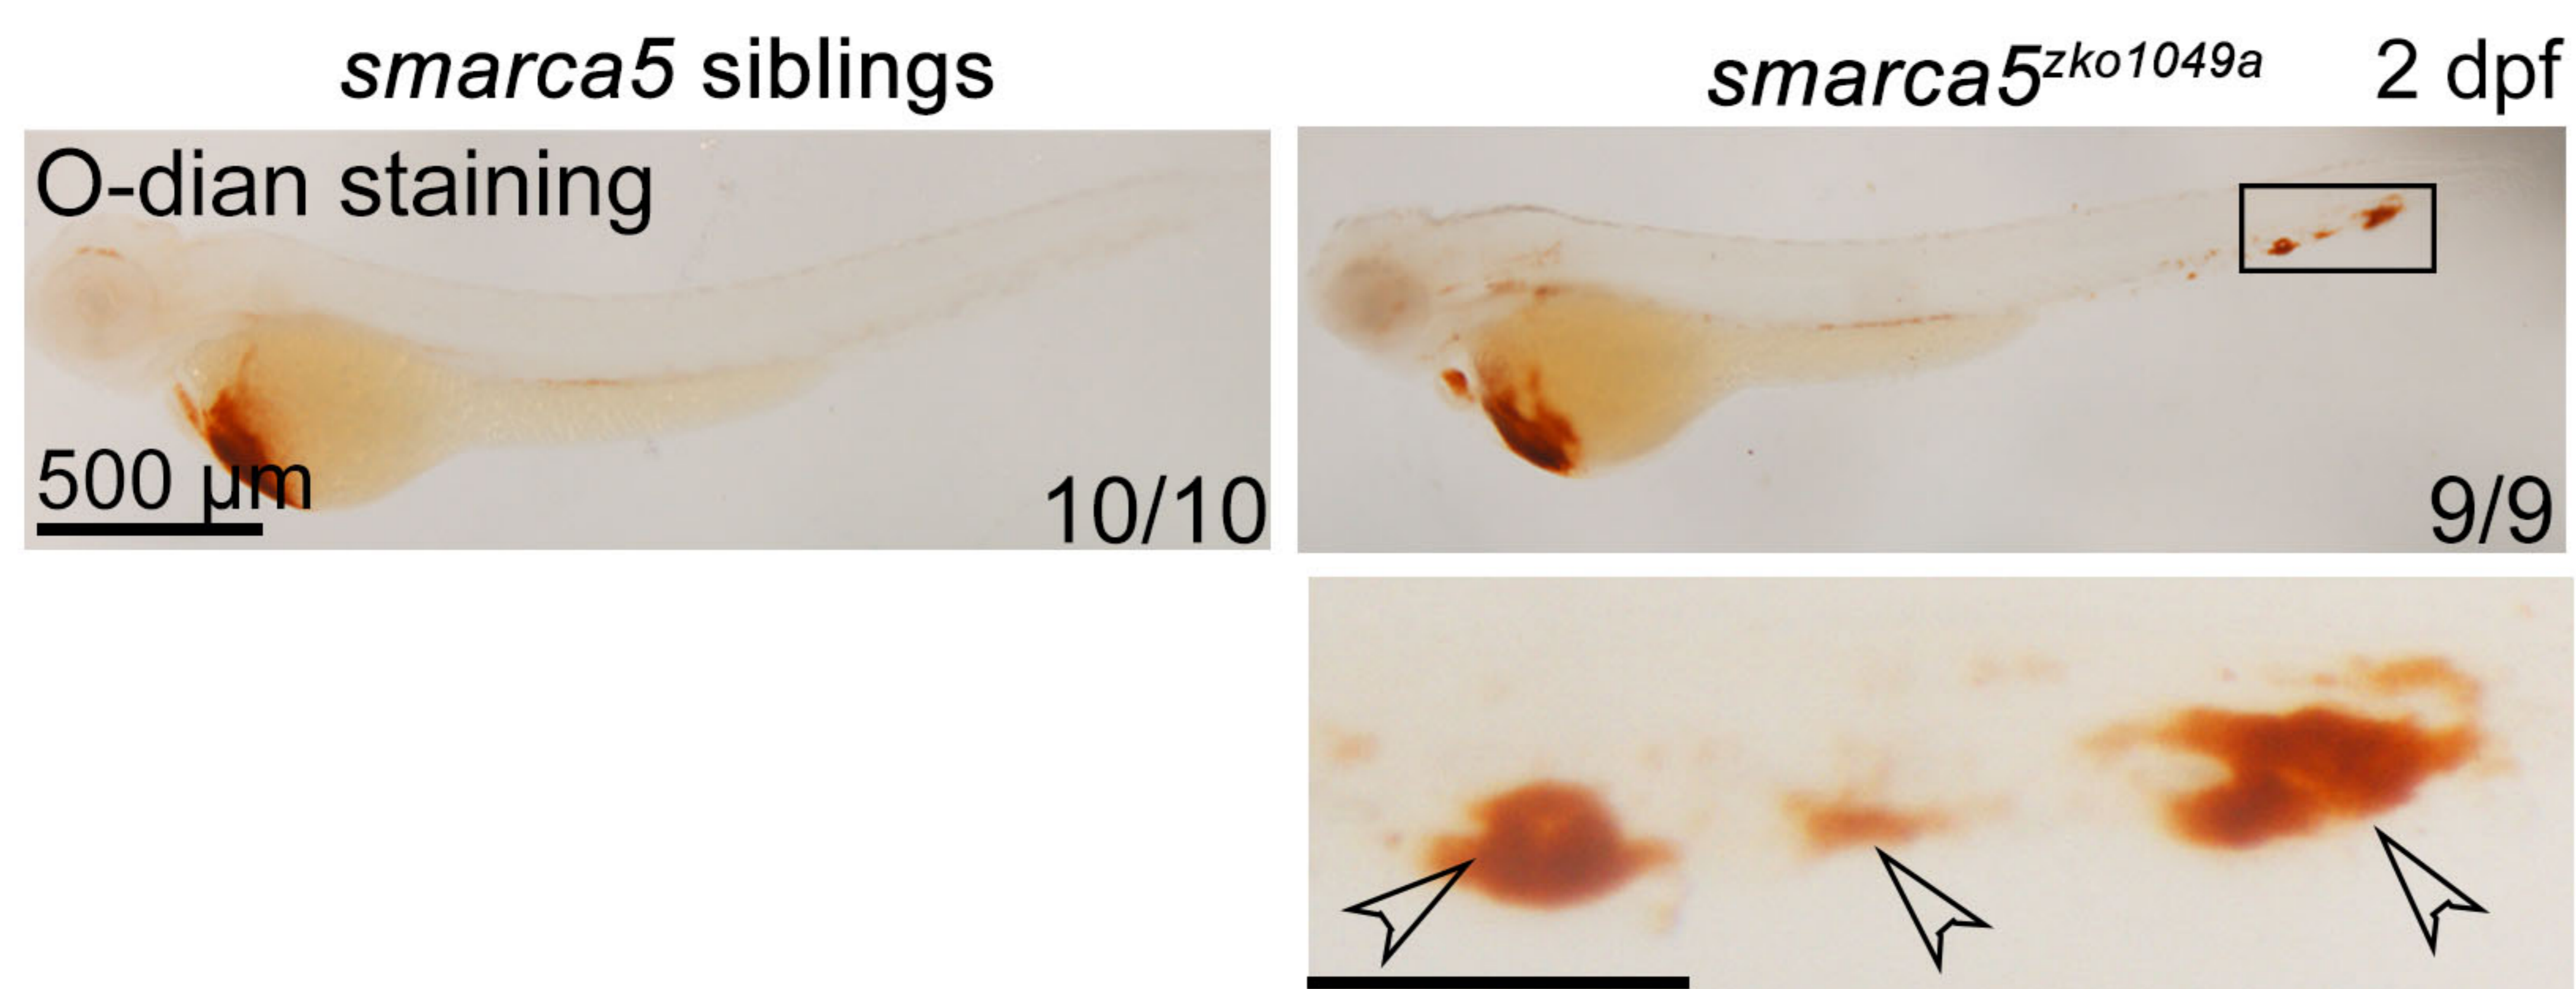

**D**

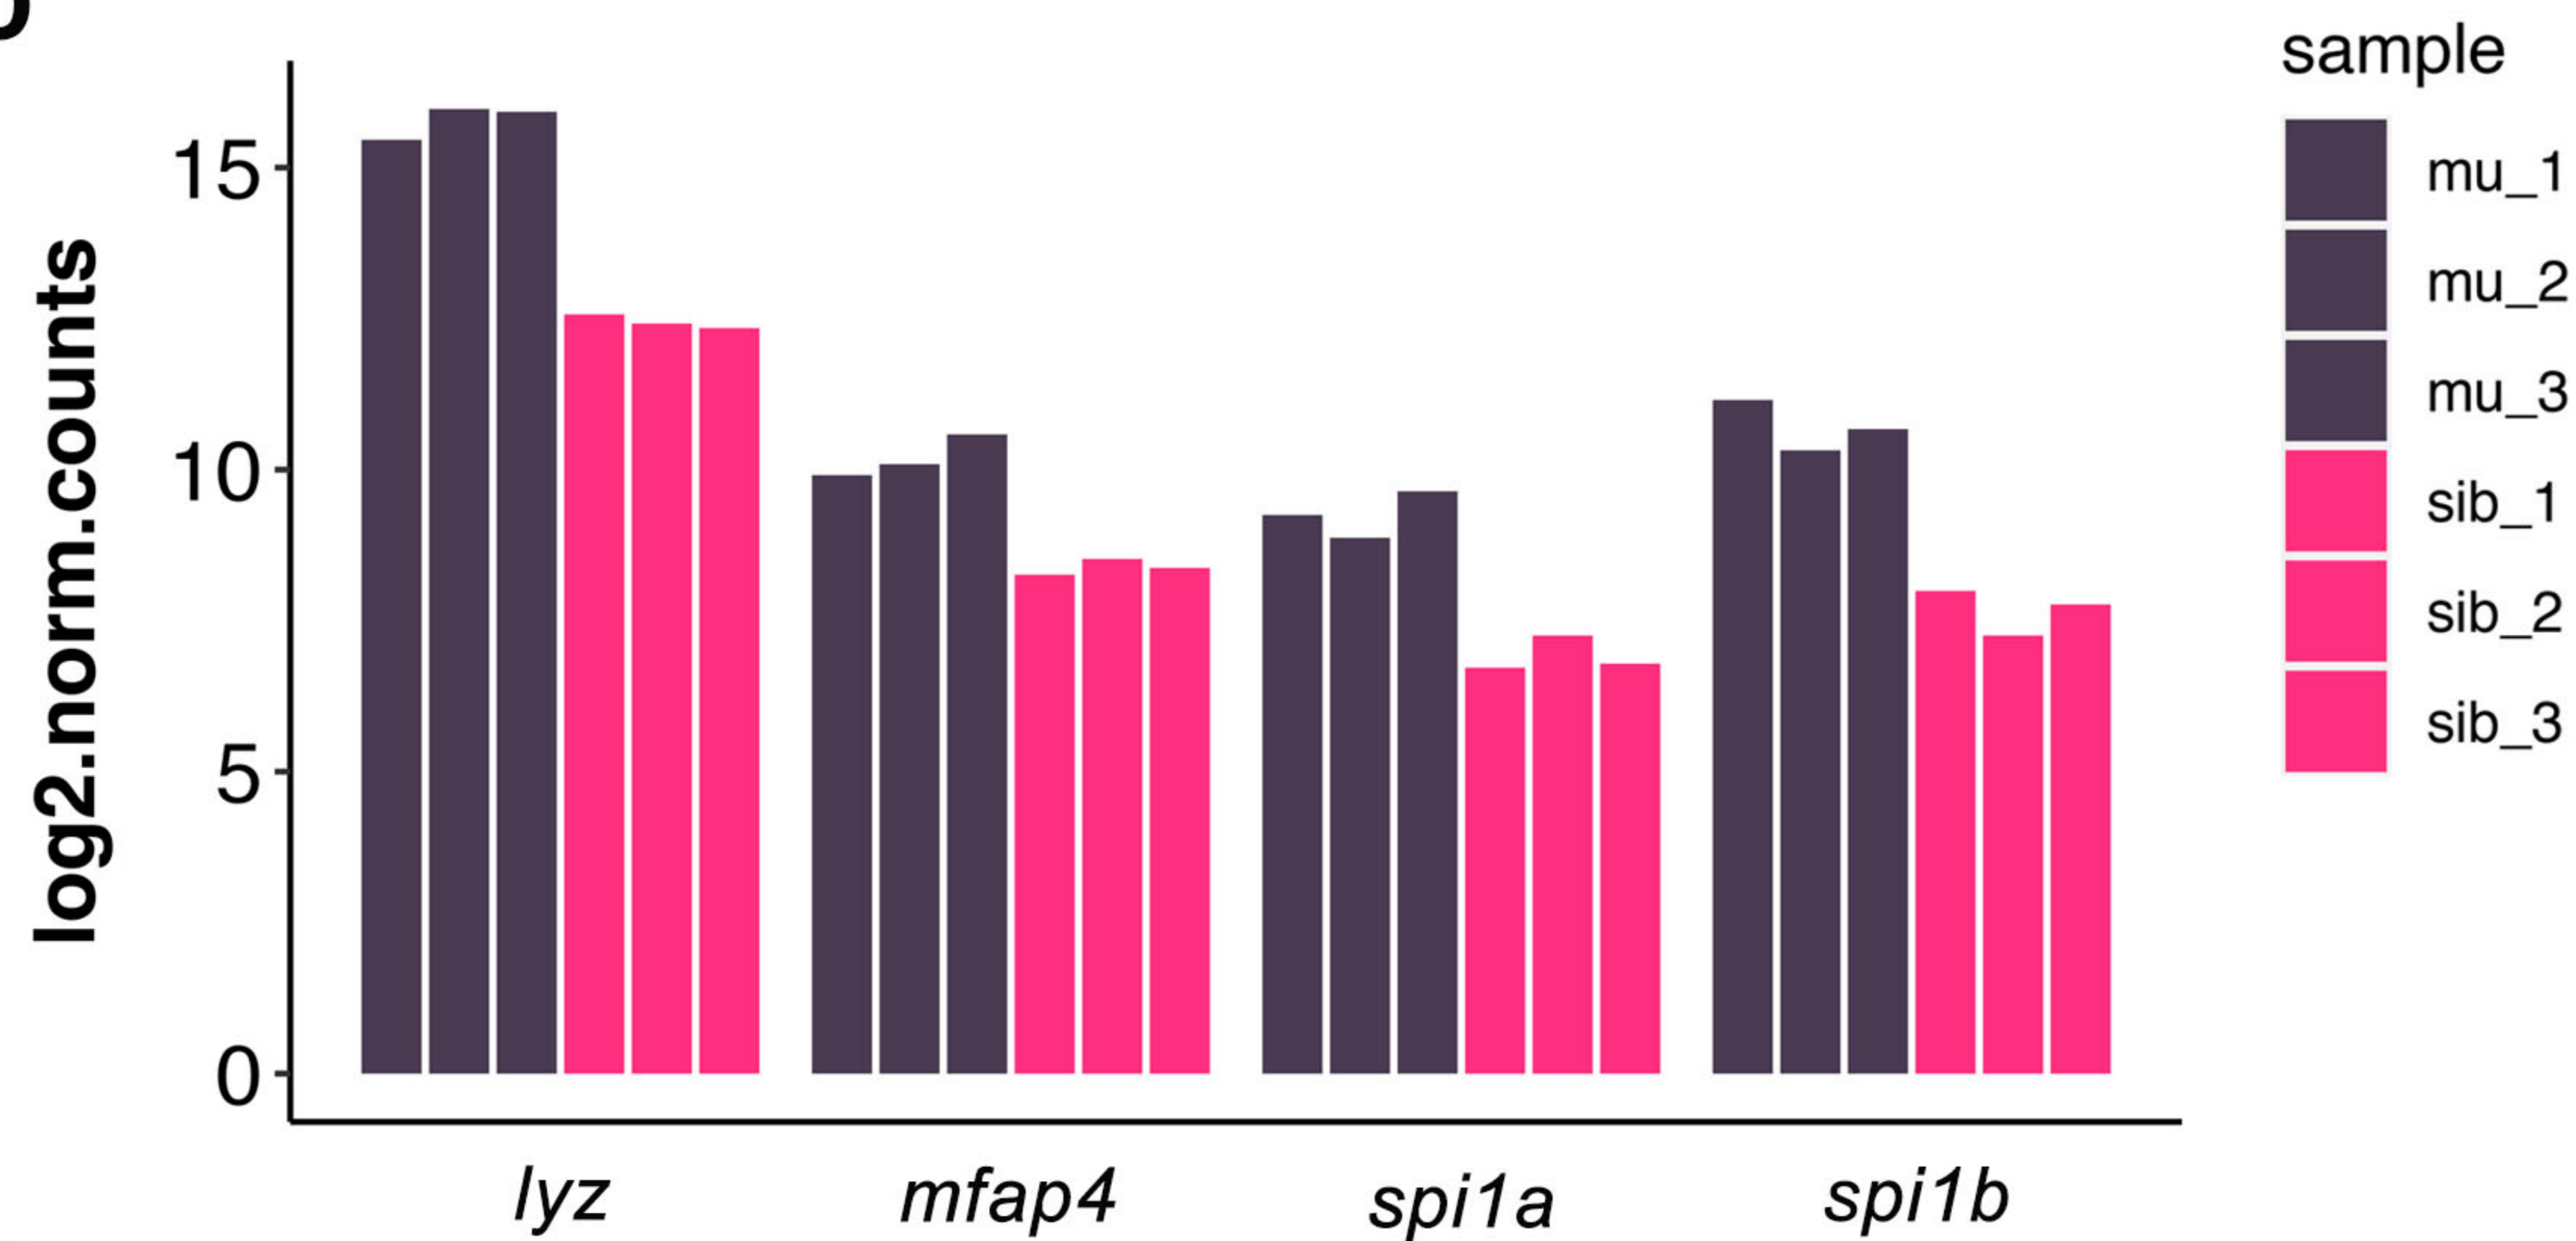

**E**

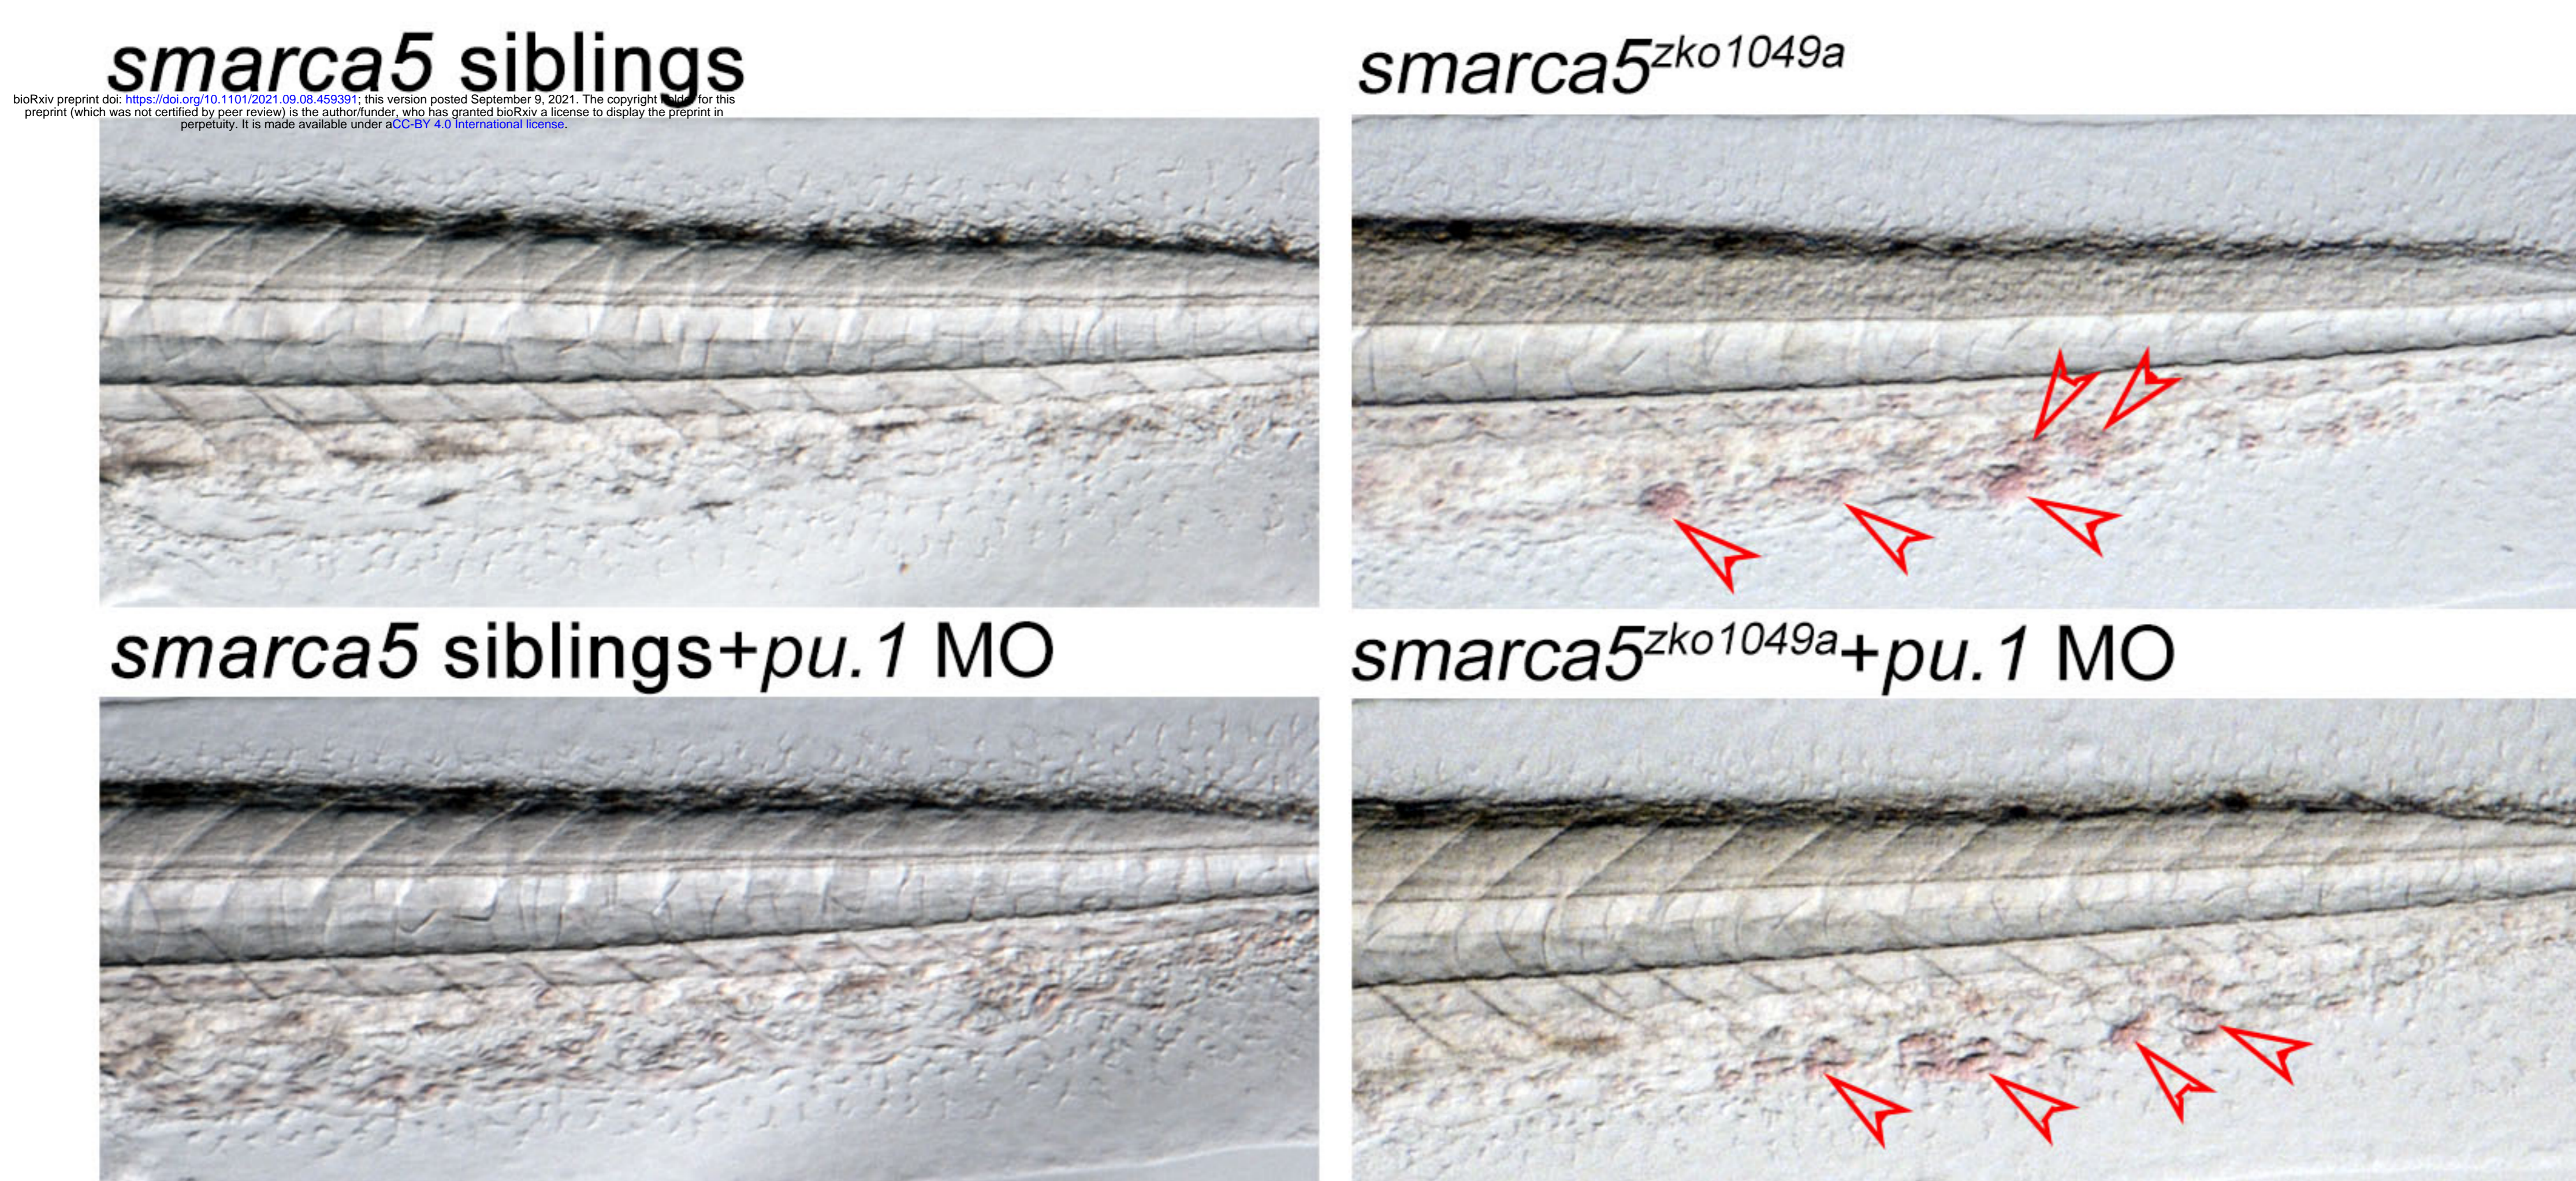

**F**

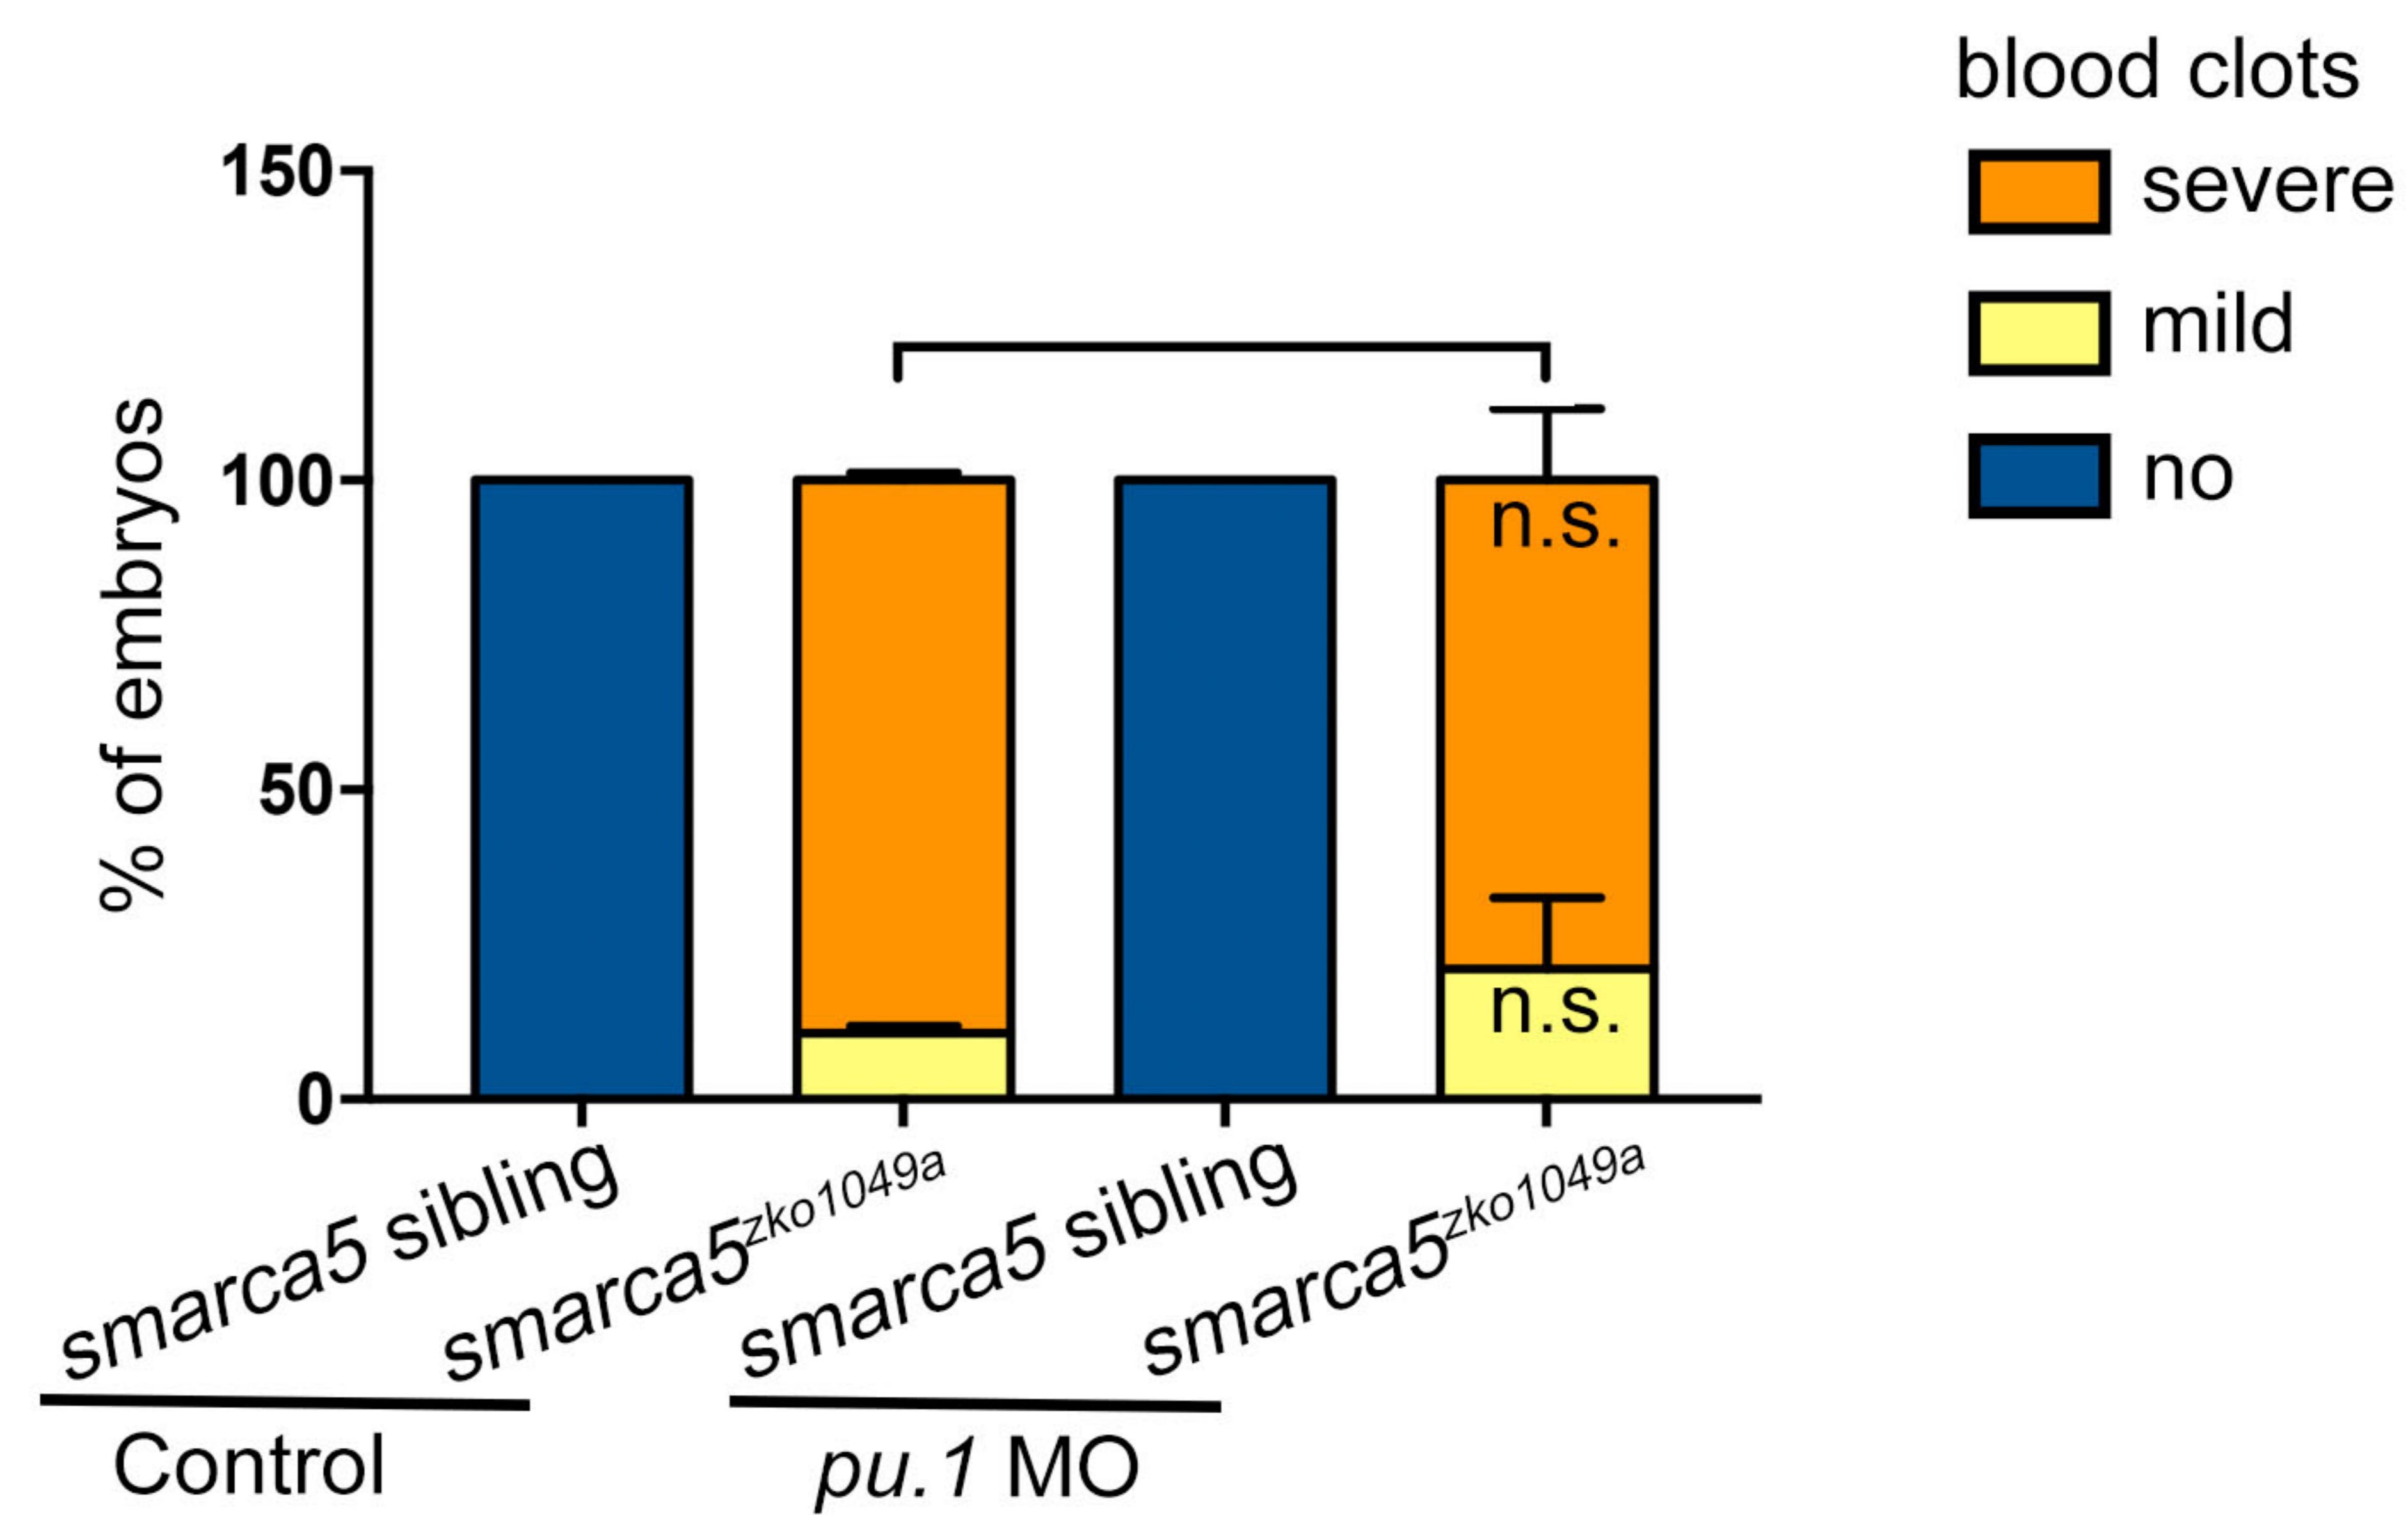

Figure S5

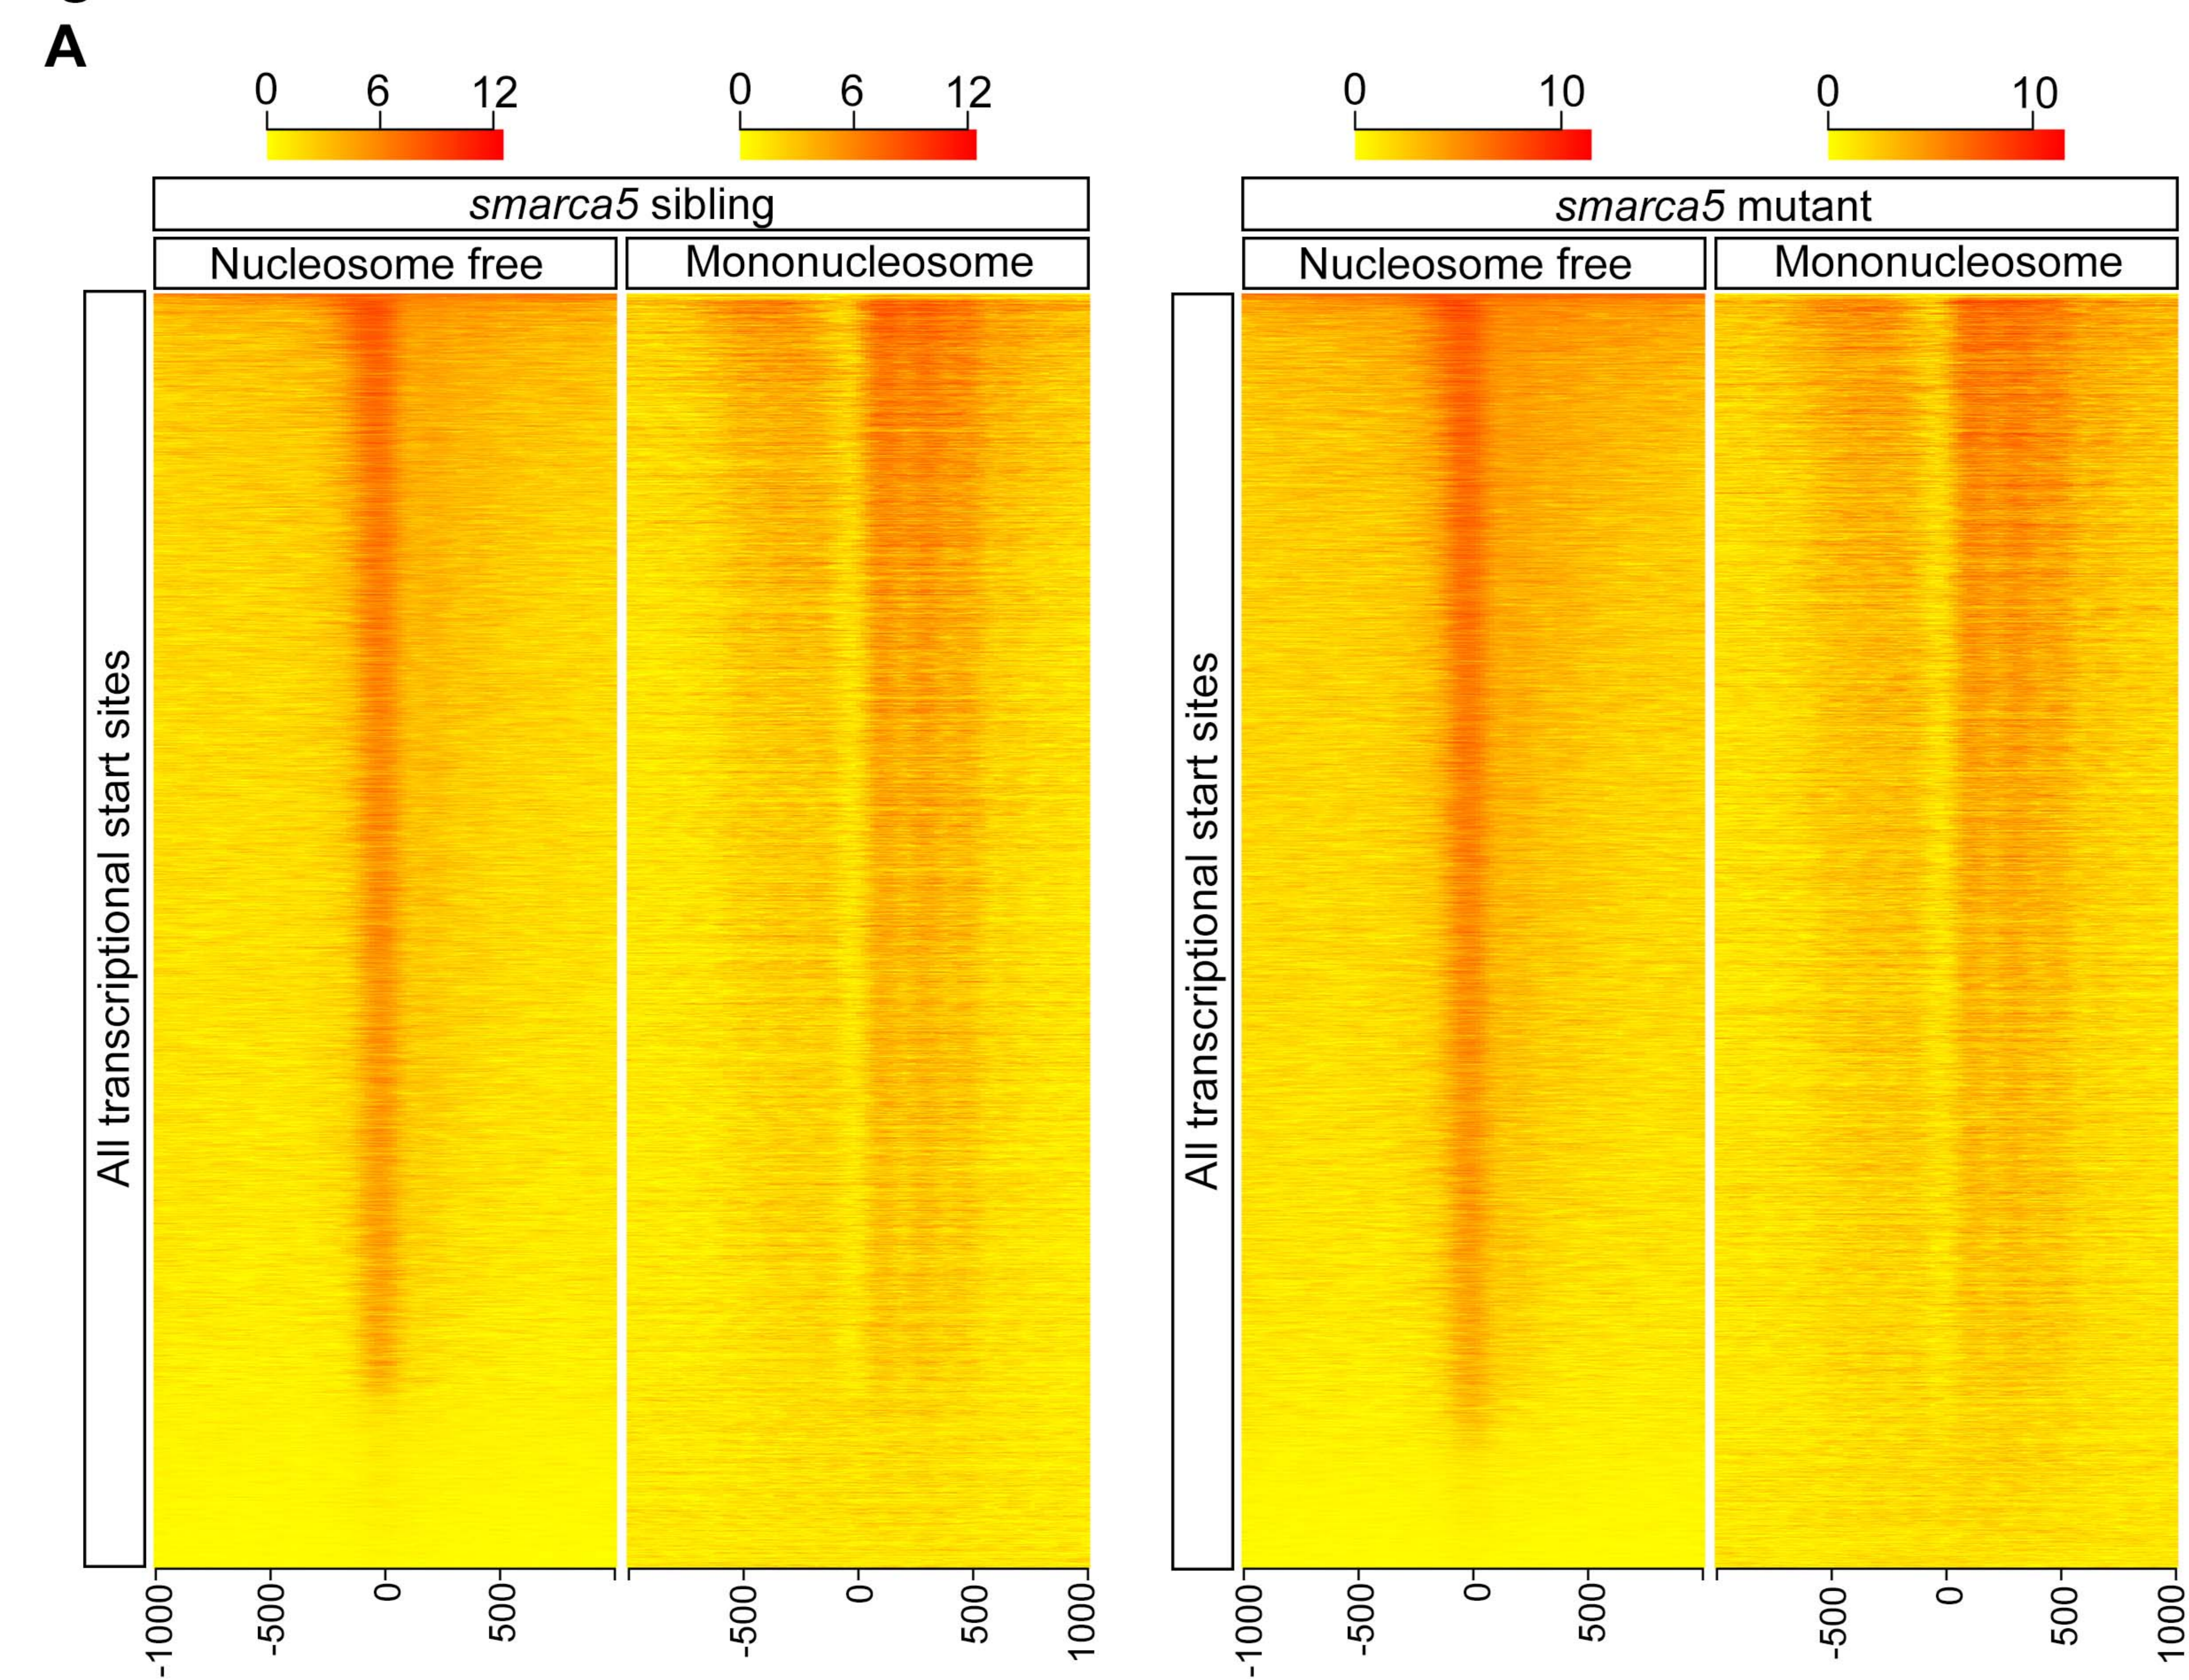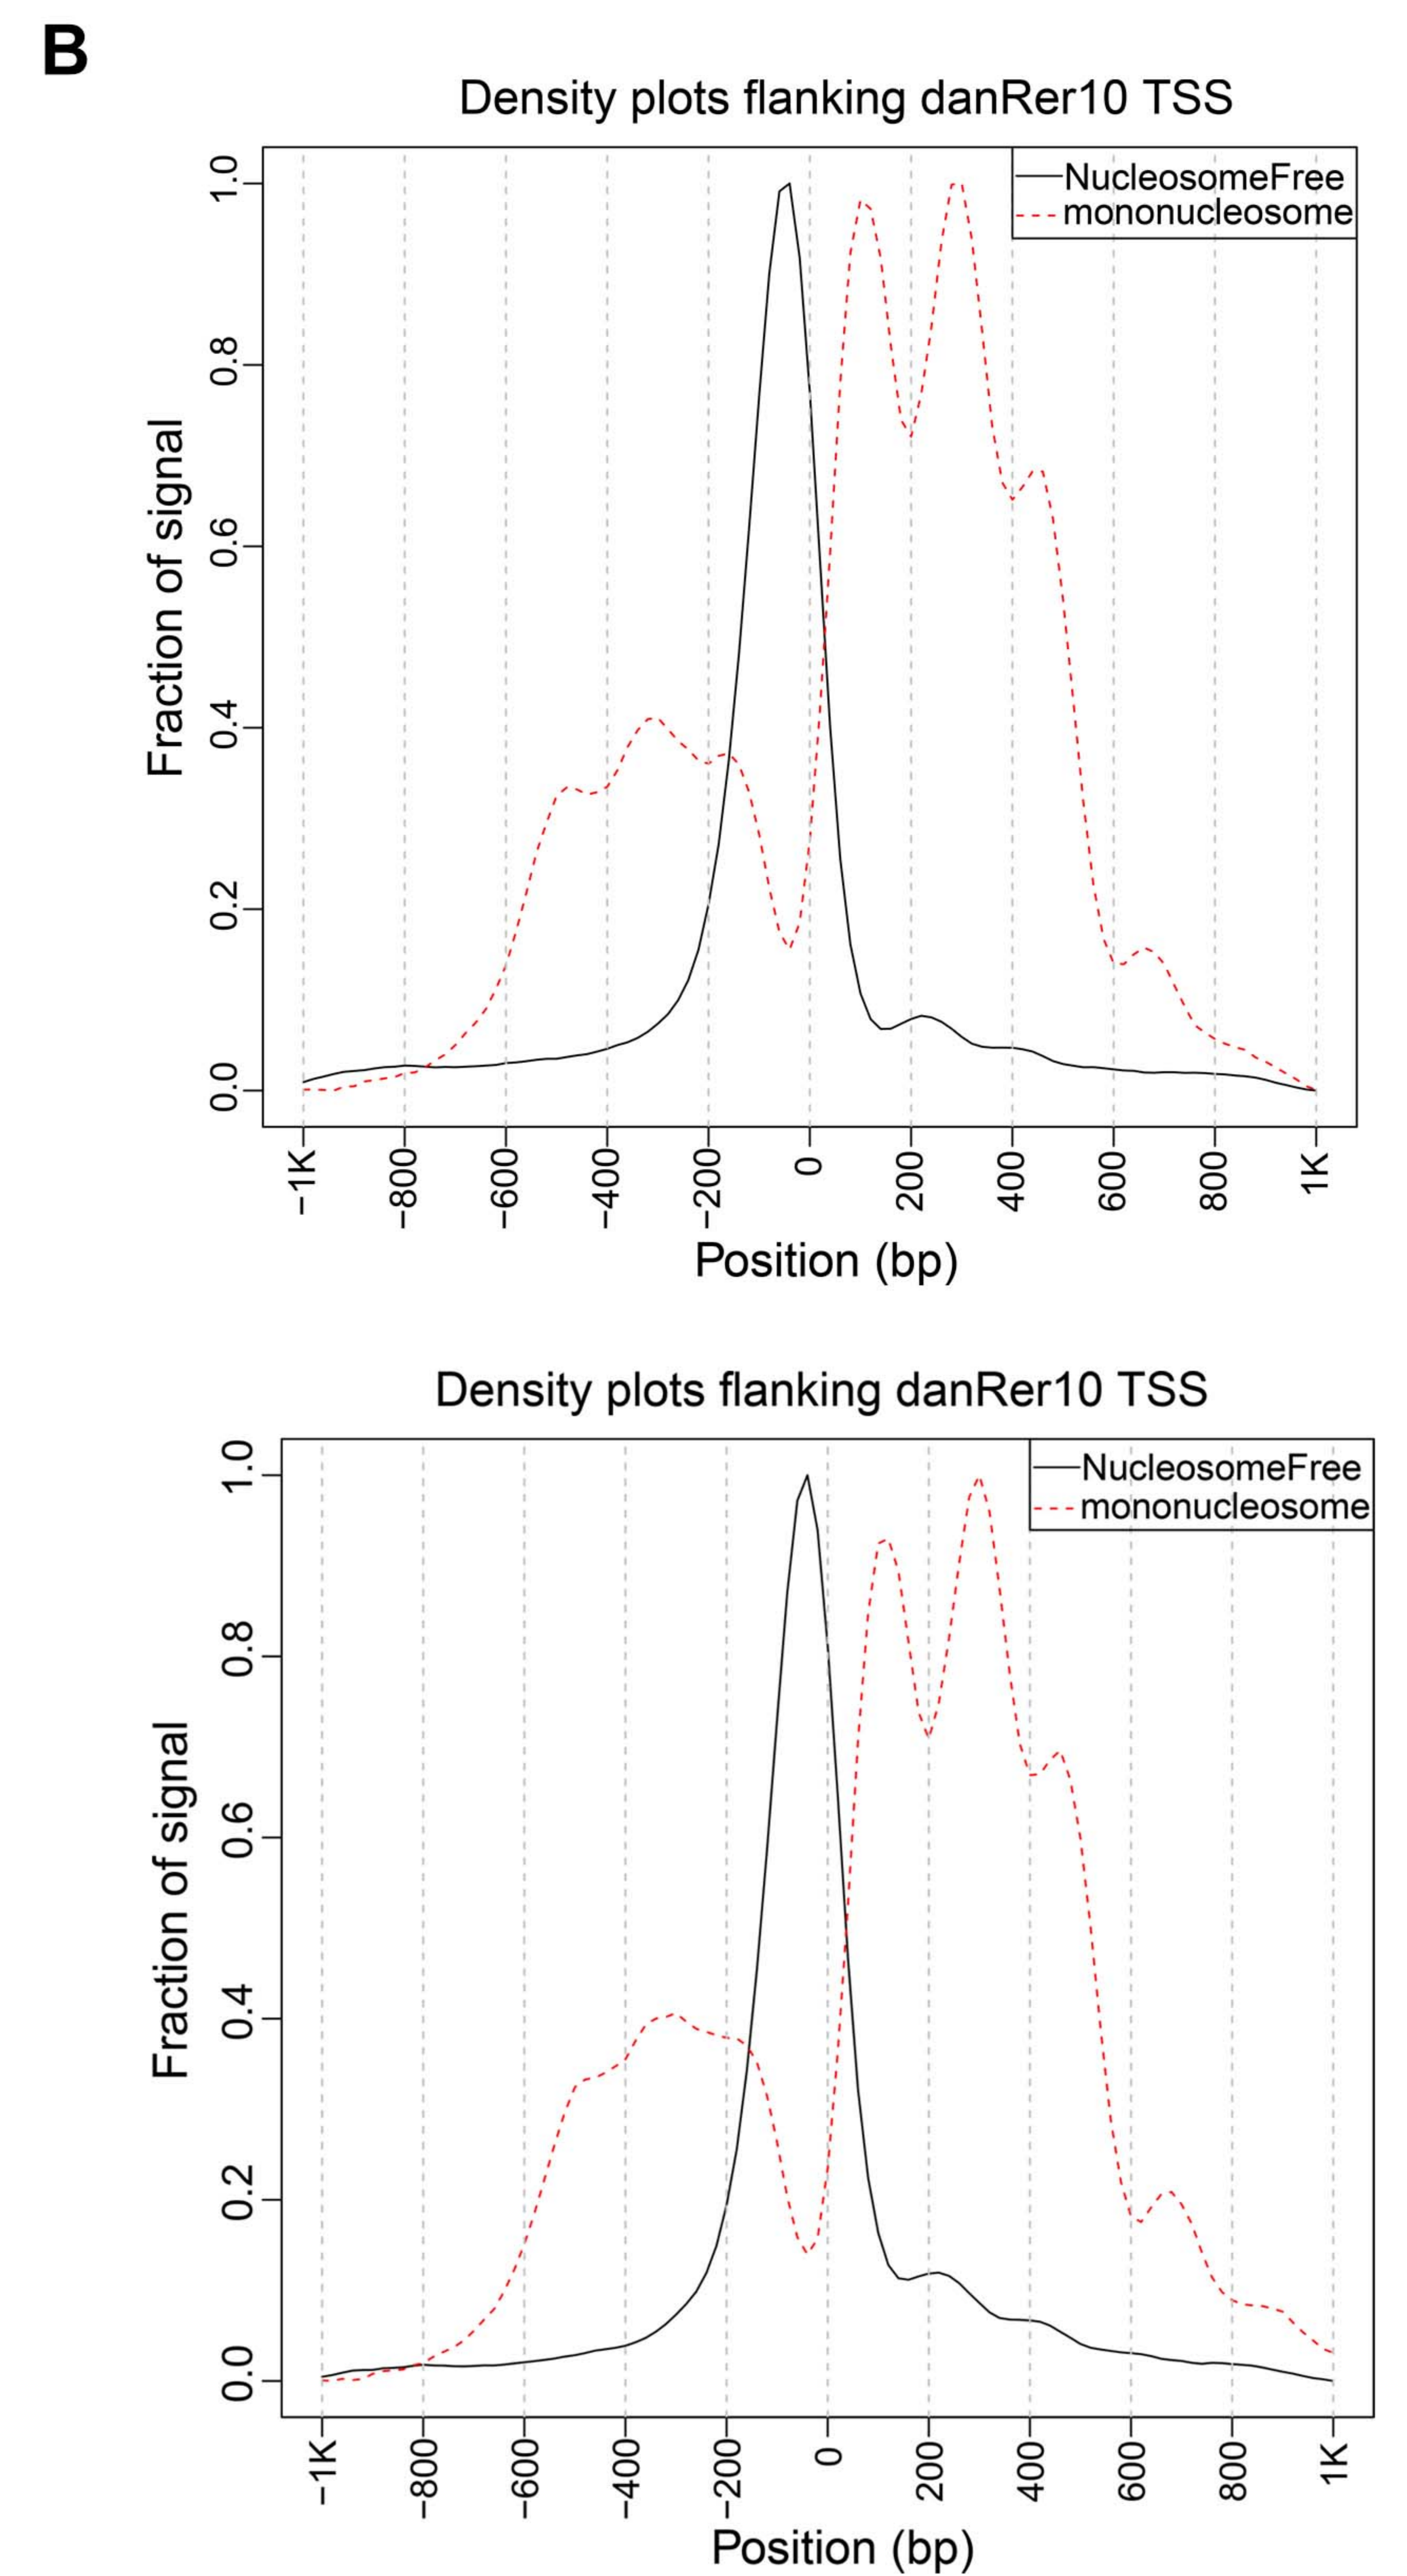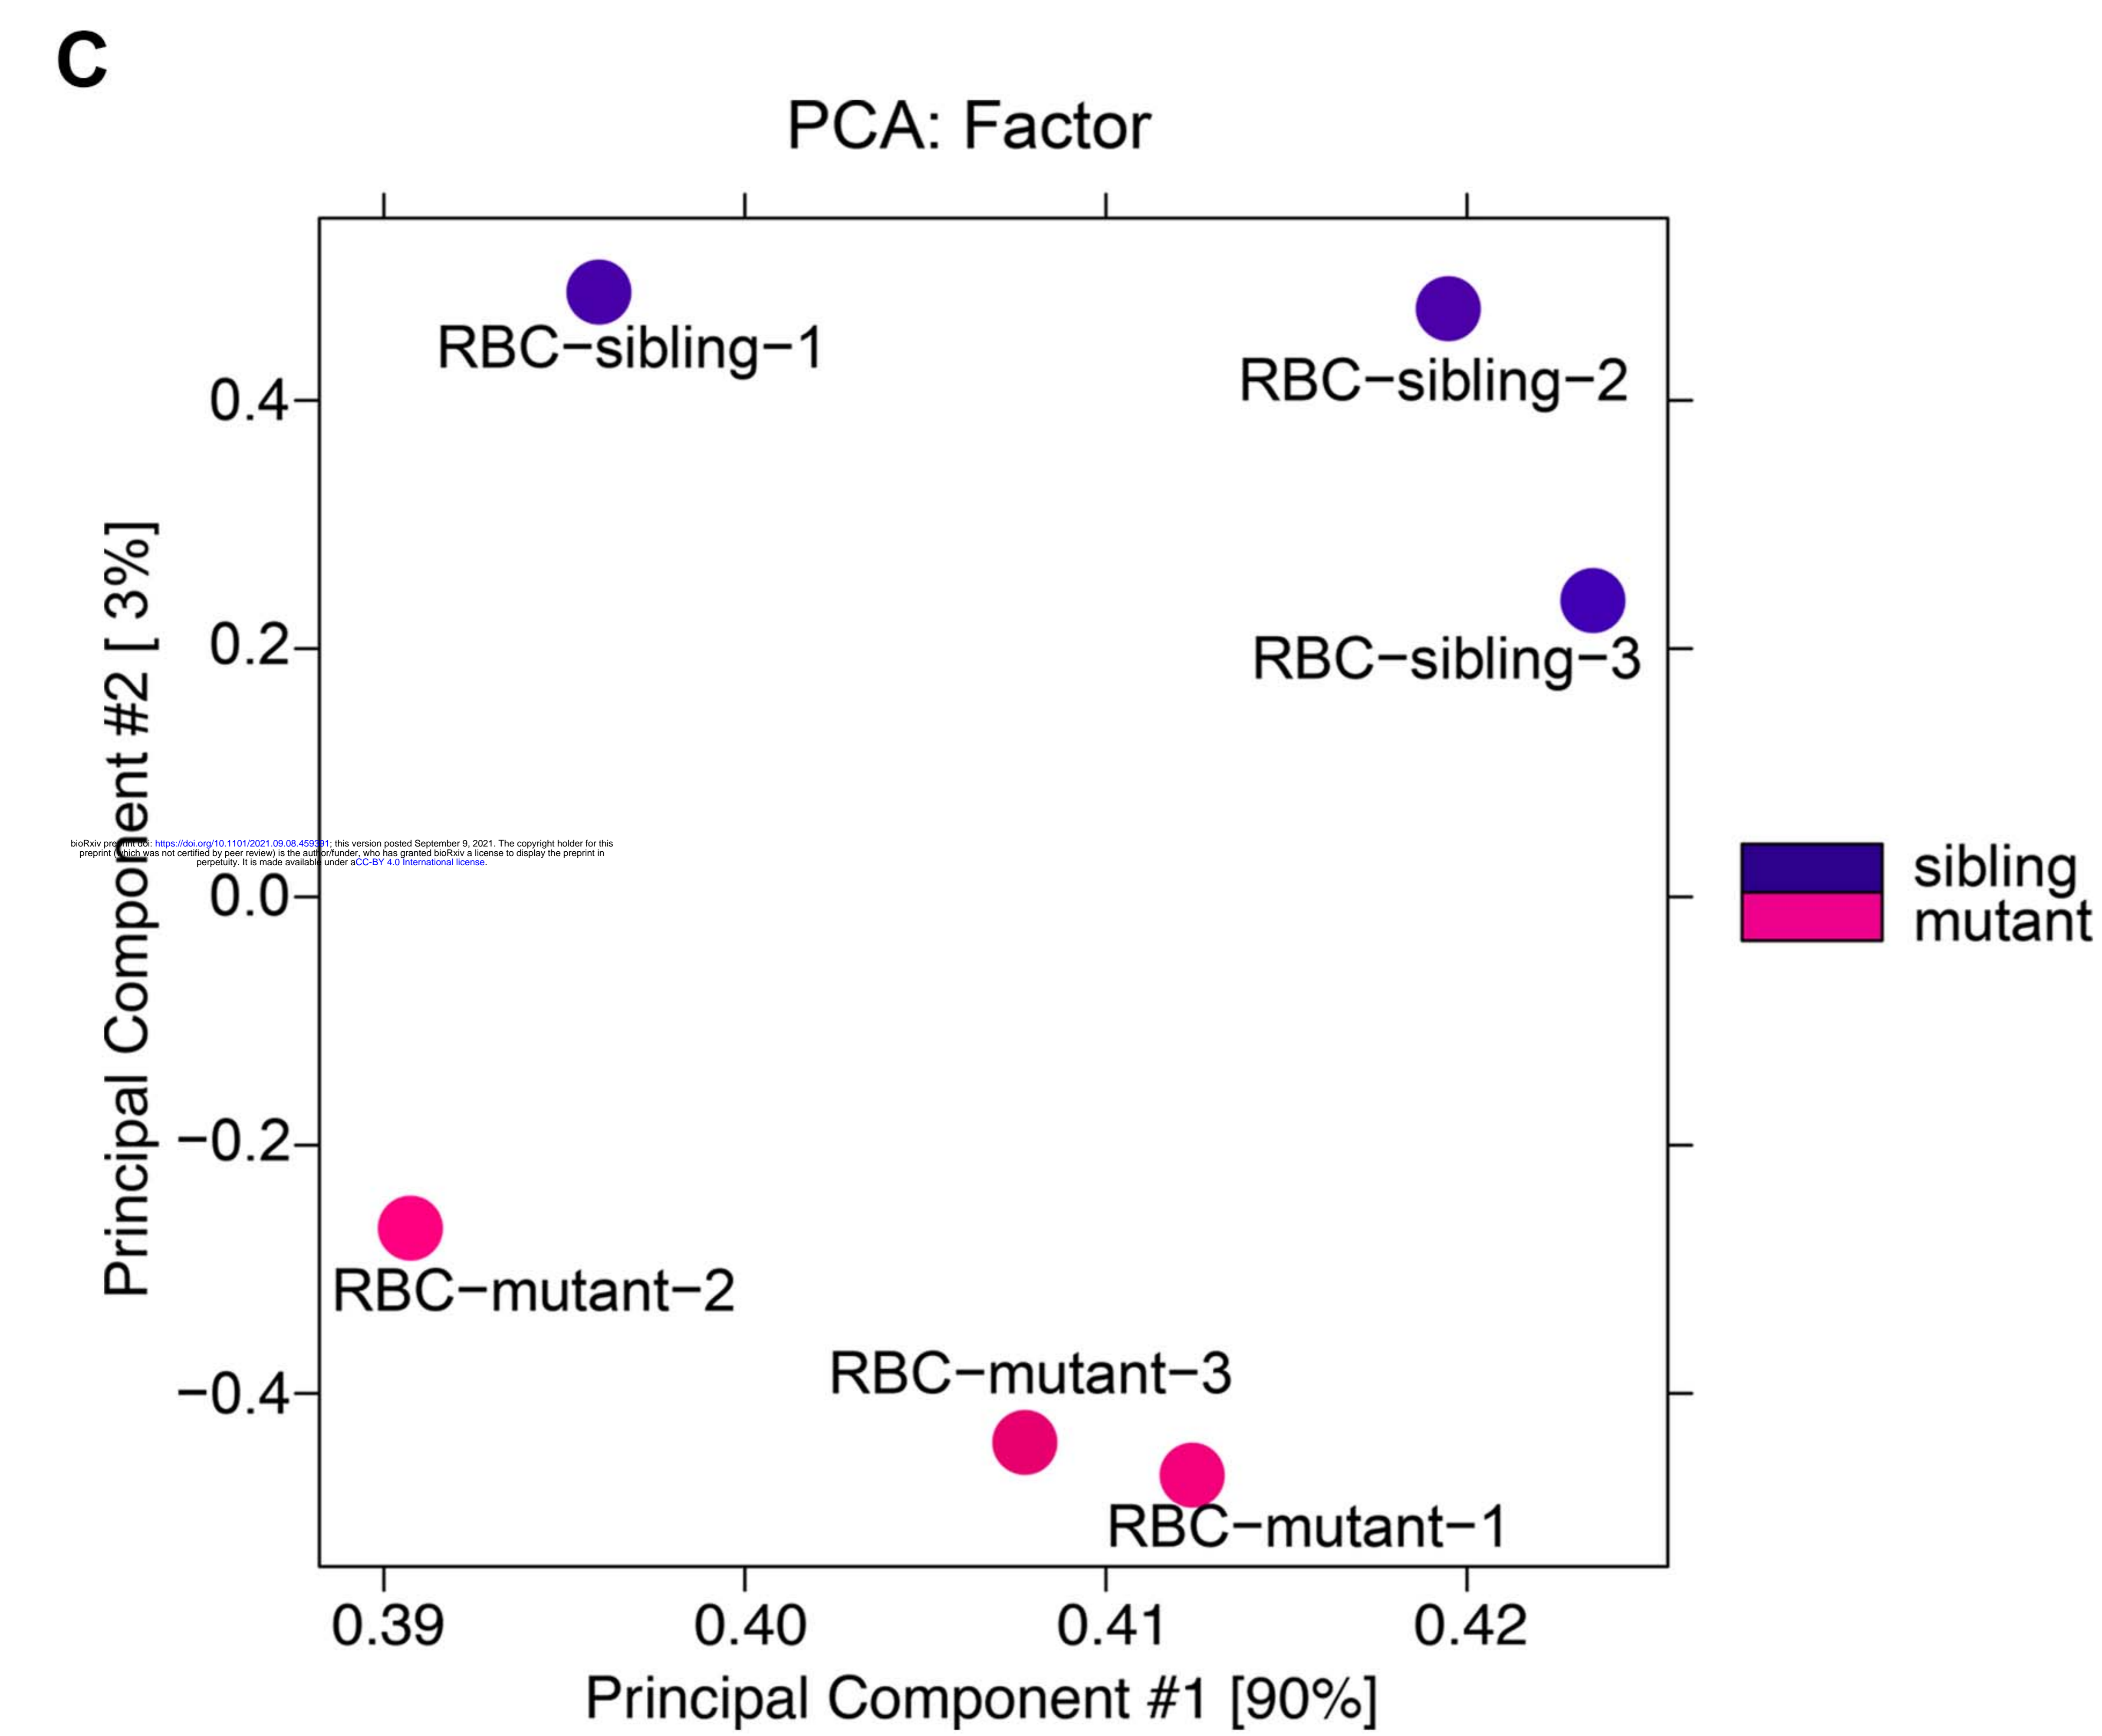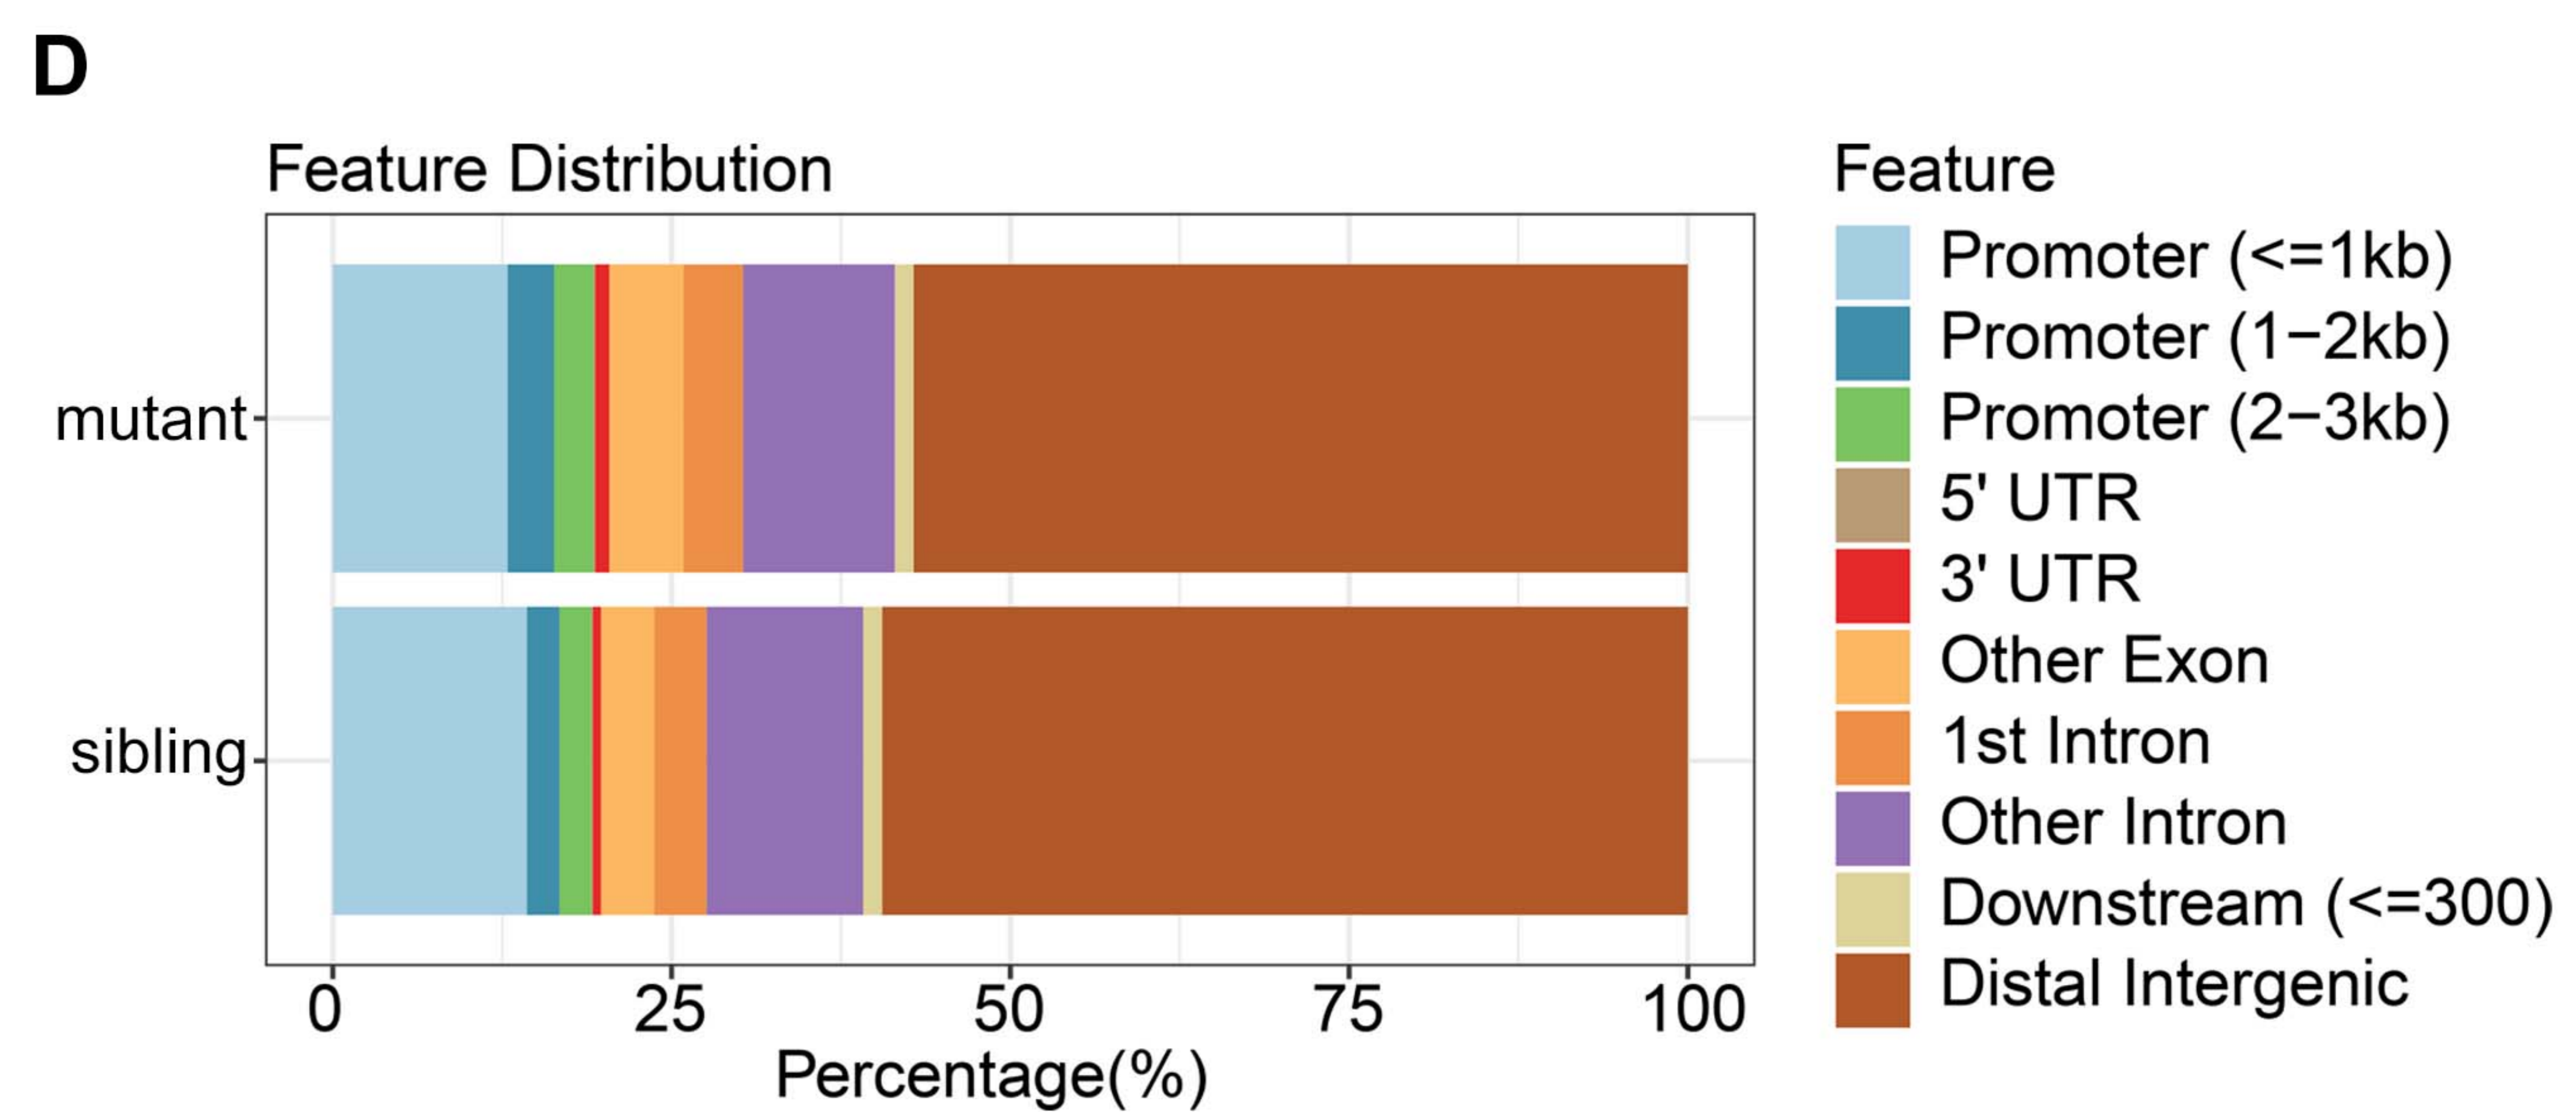

**Figure S6**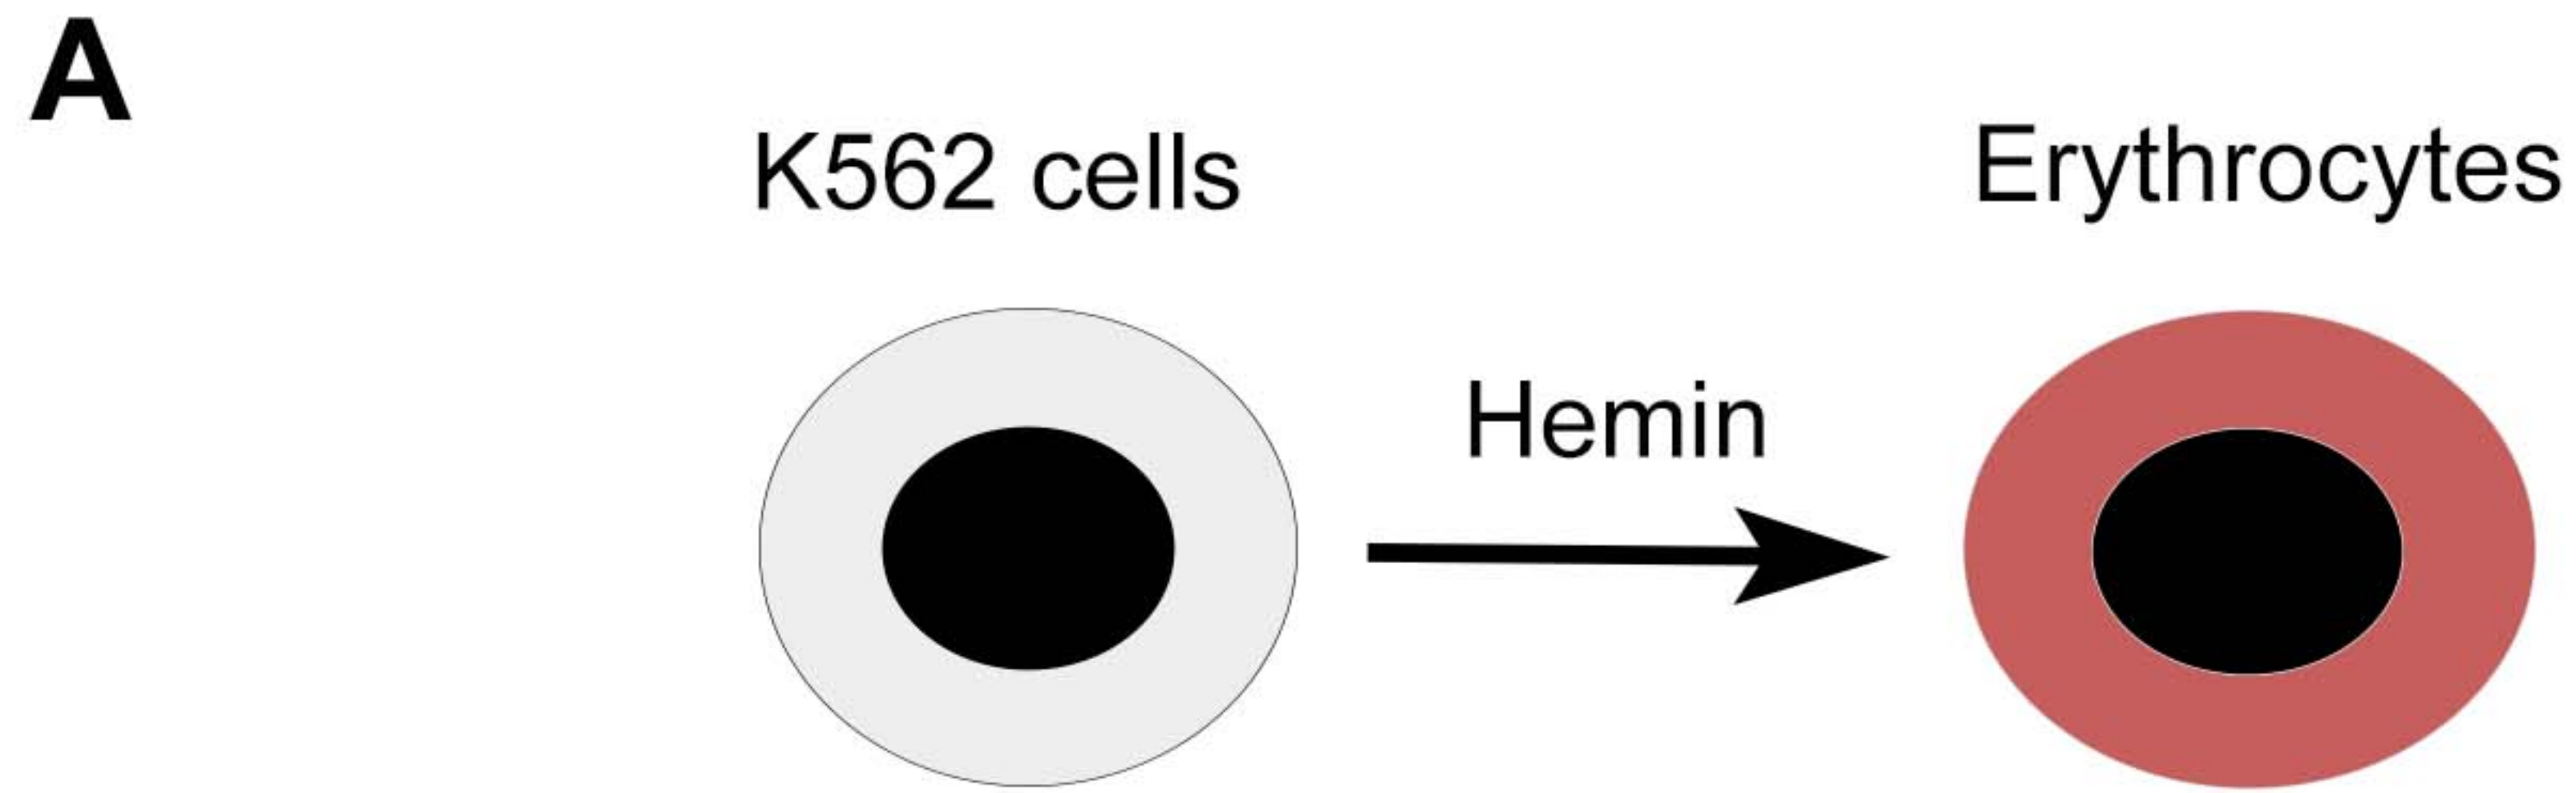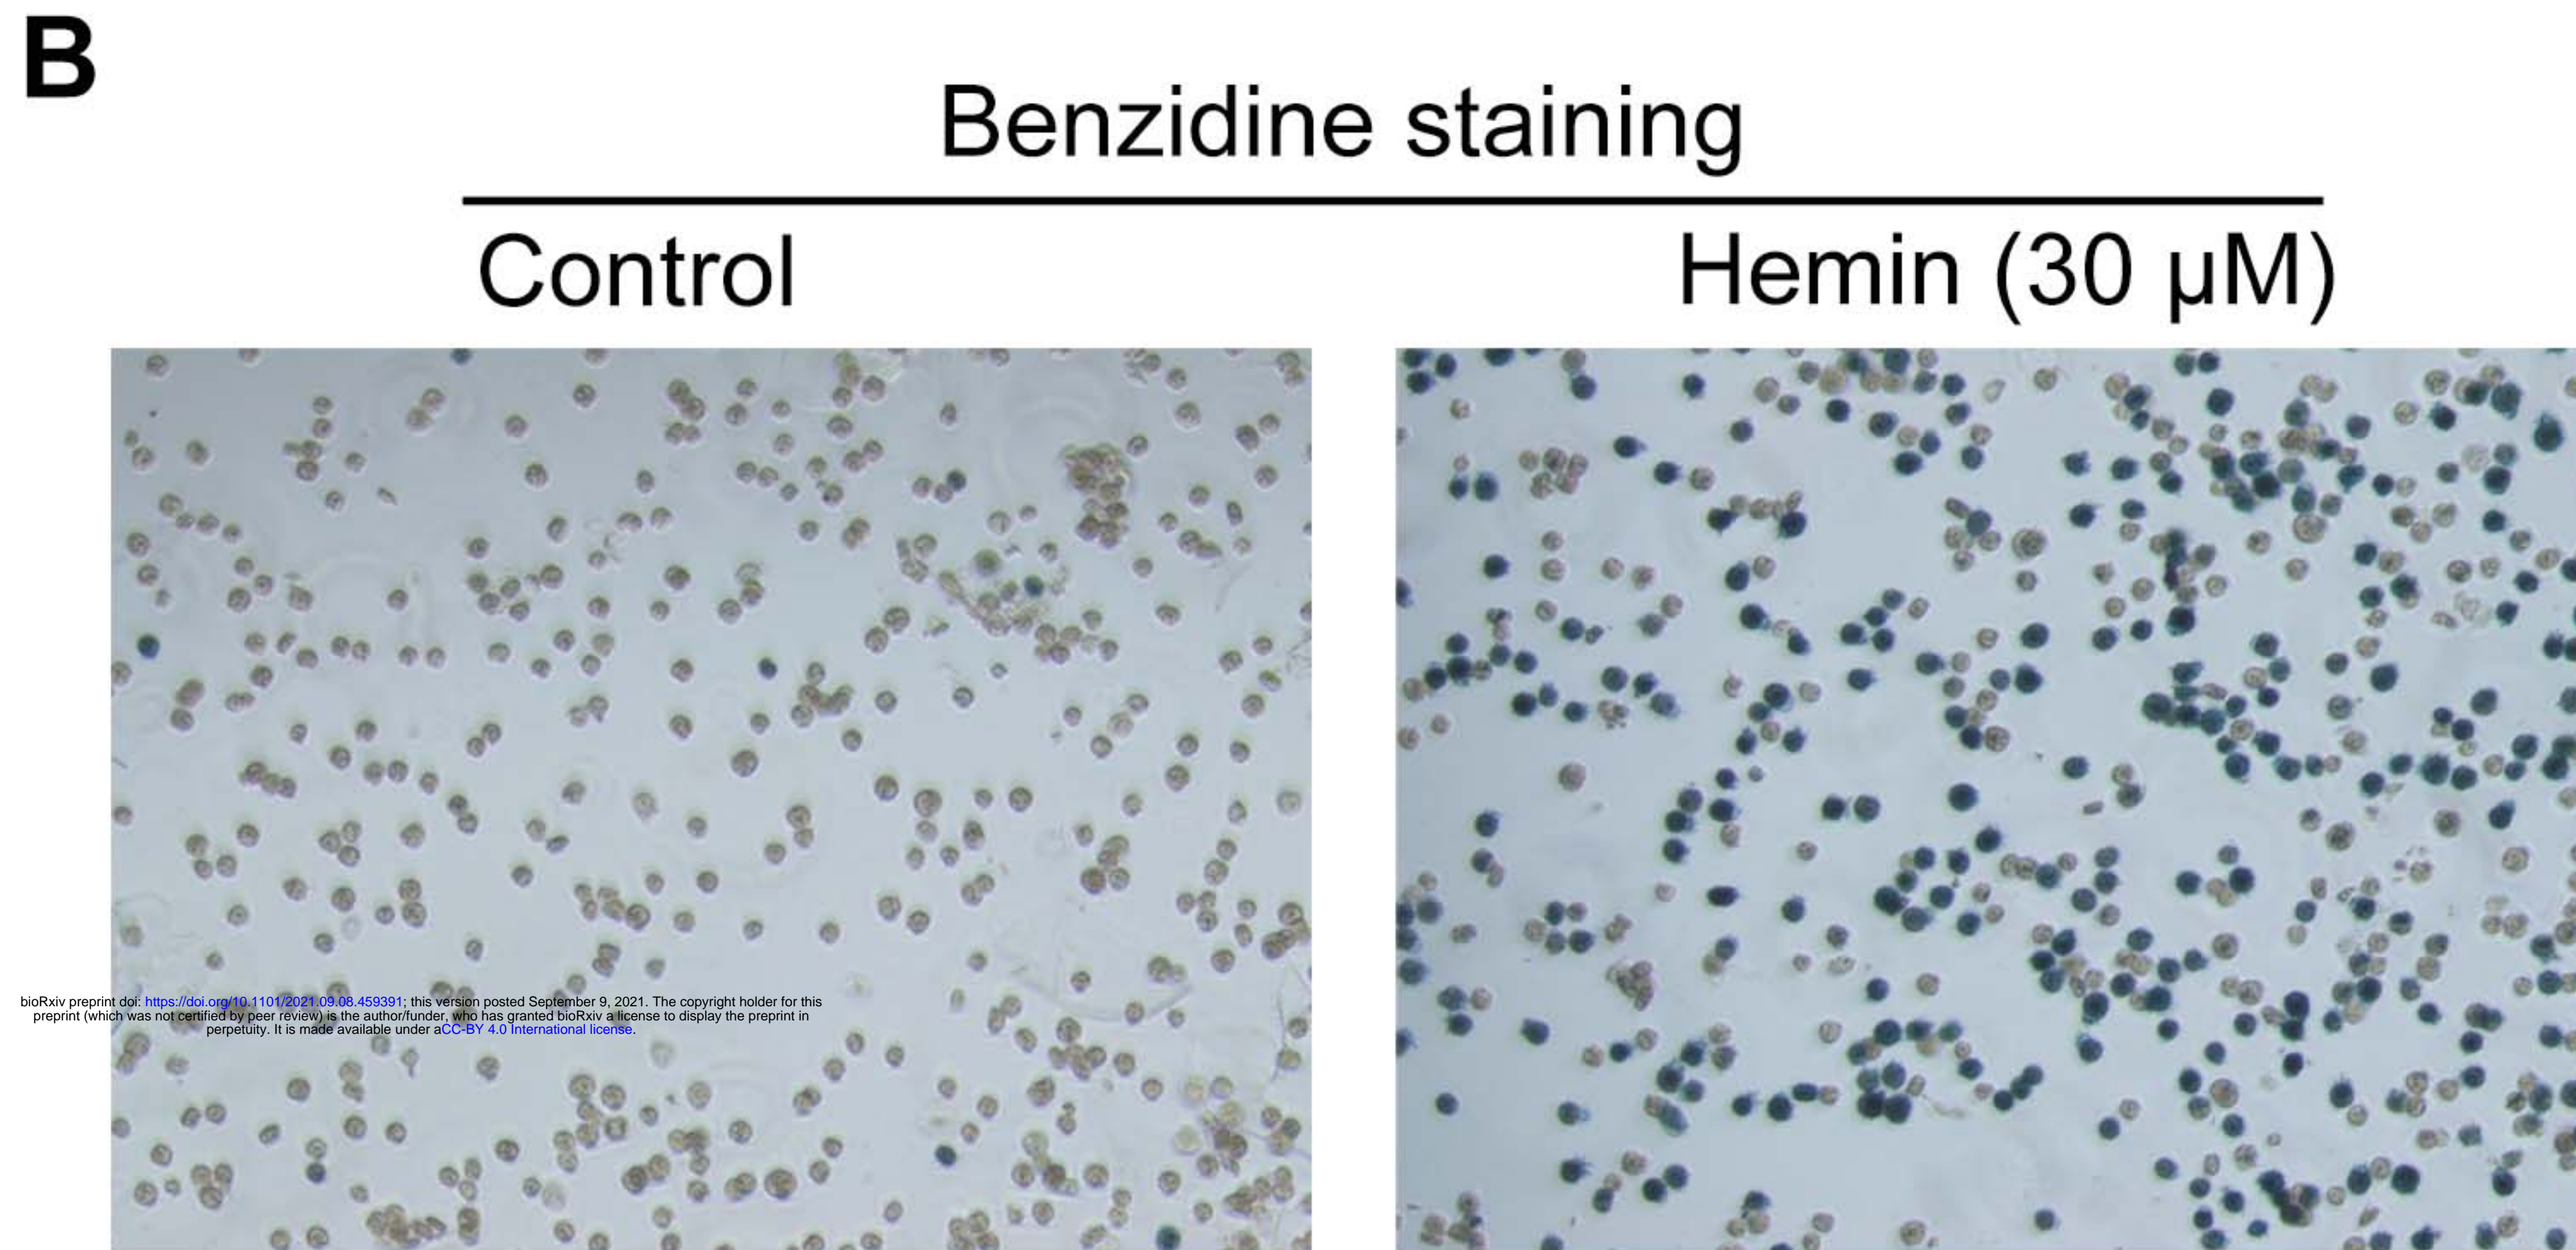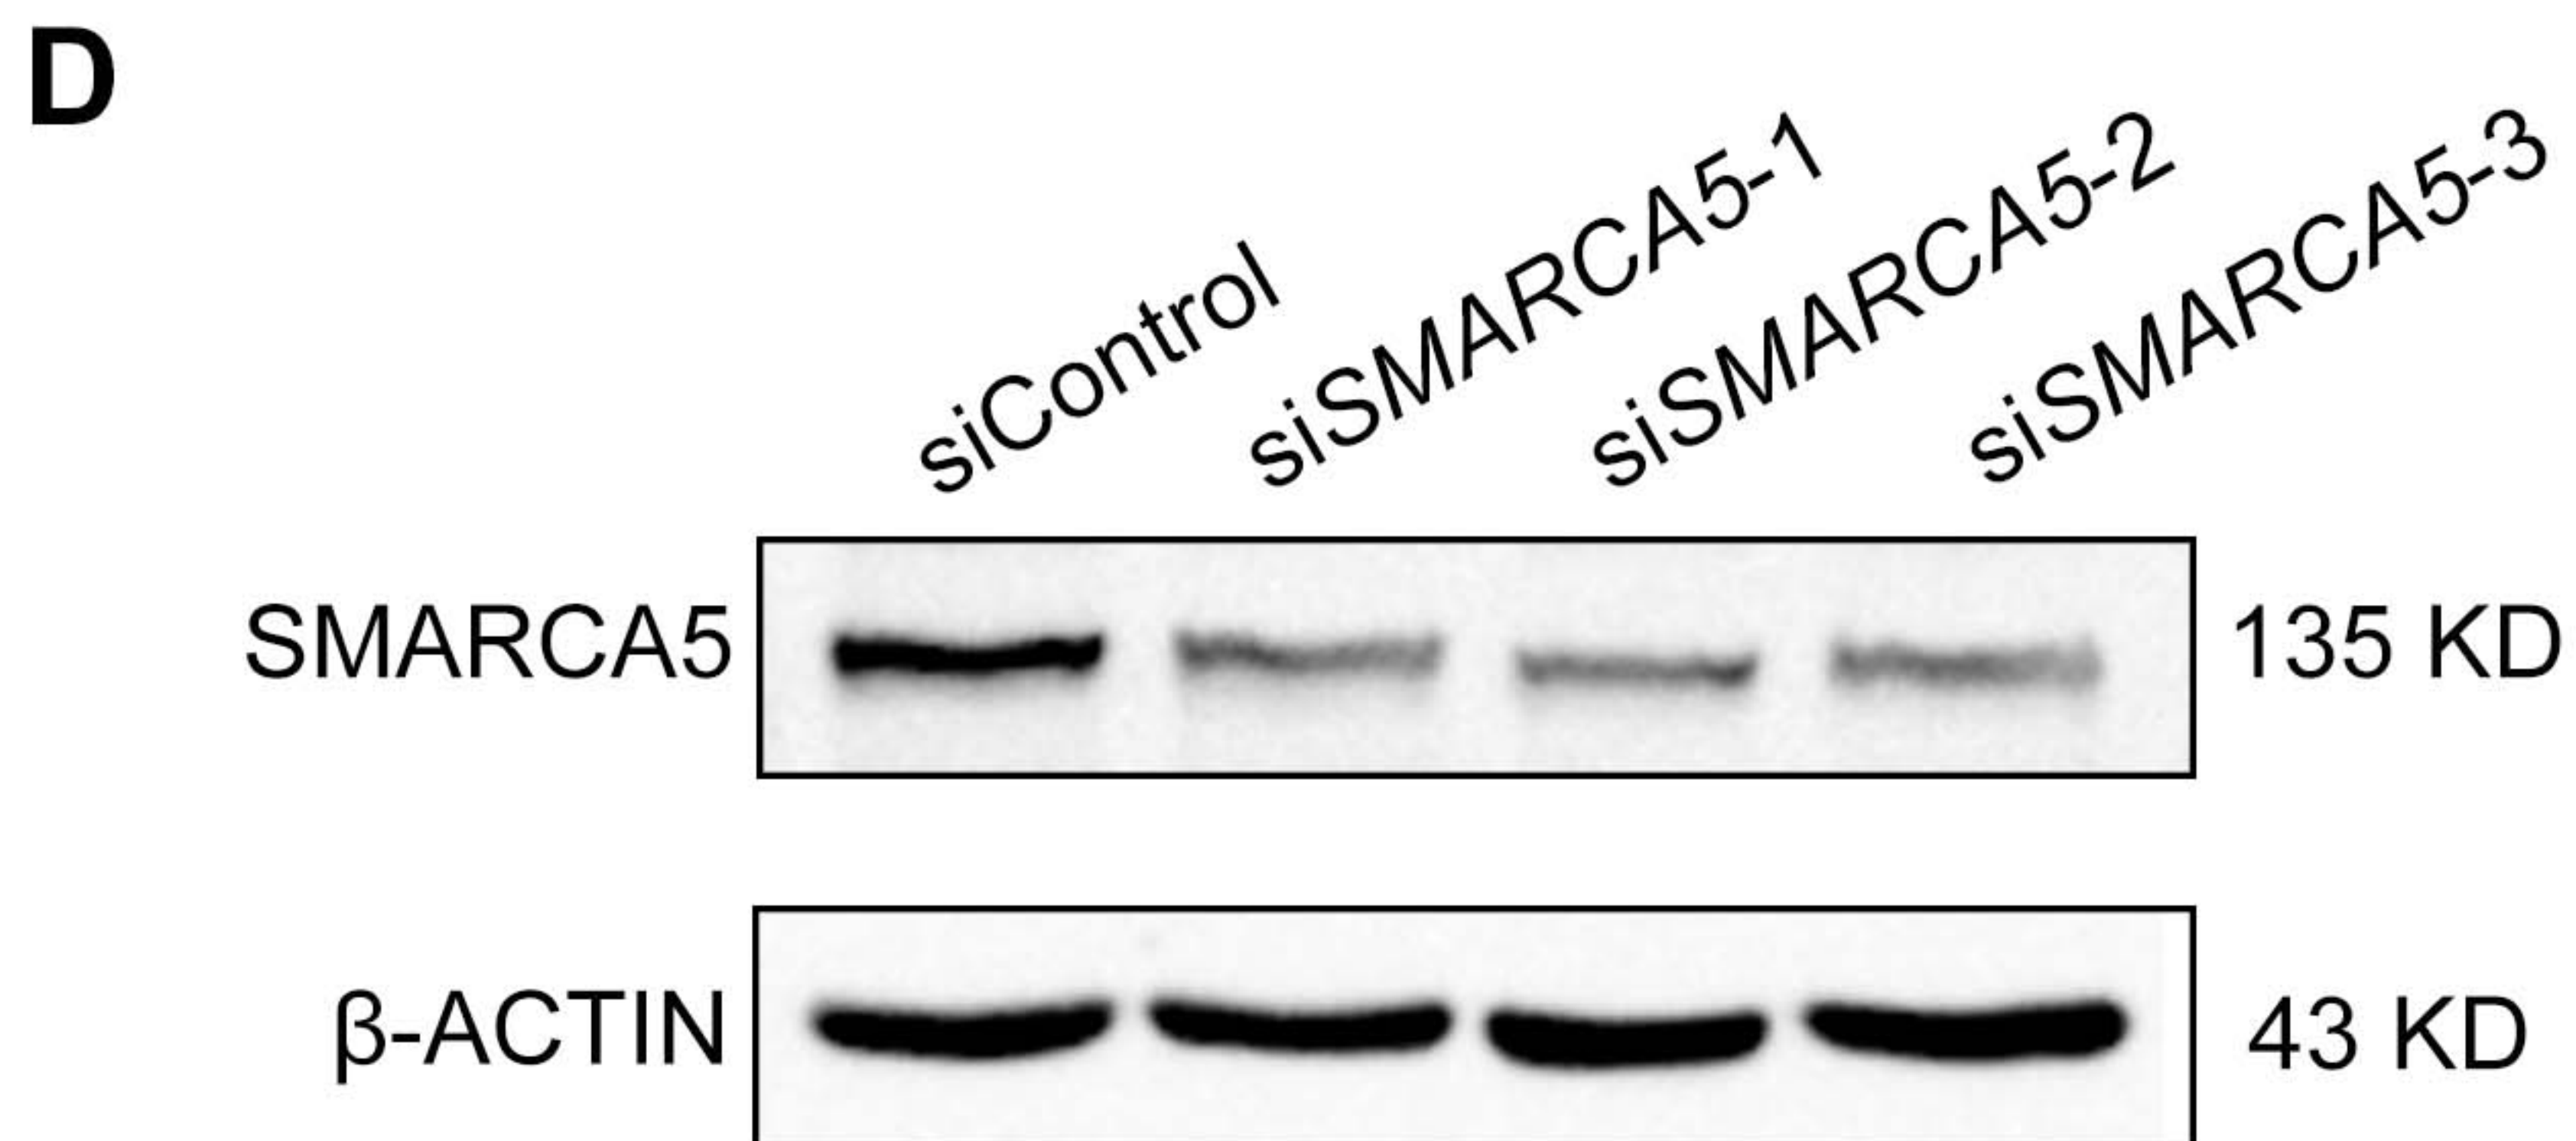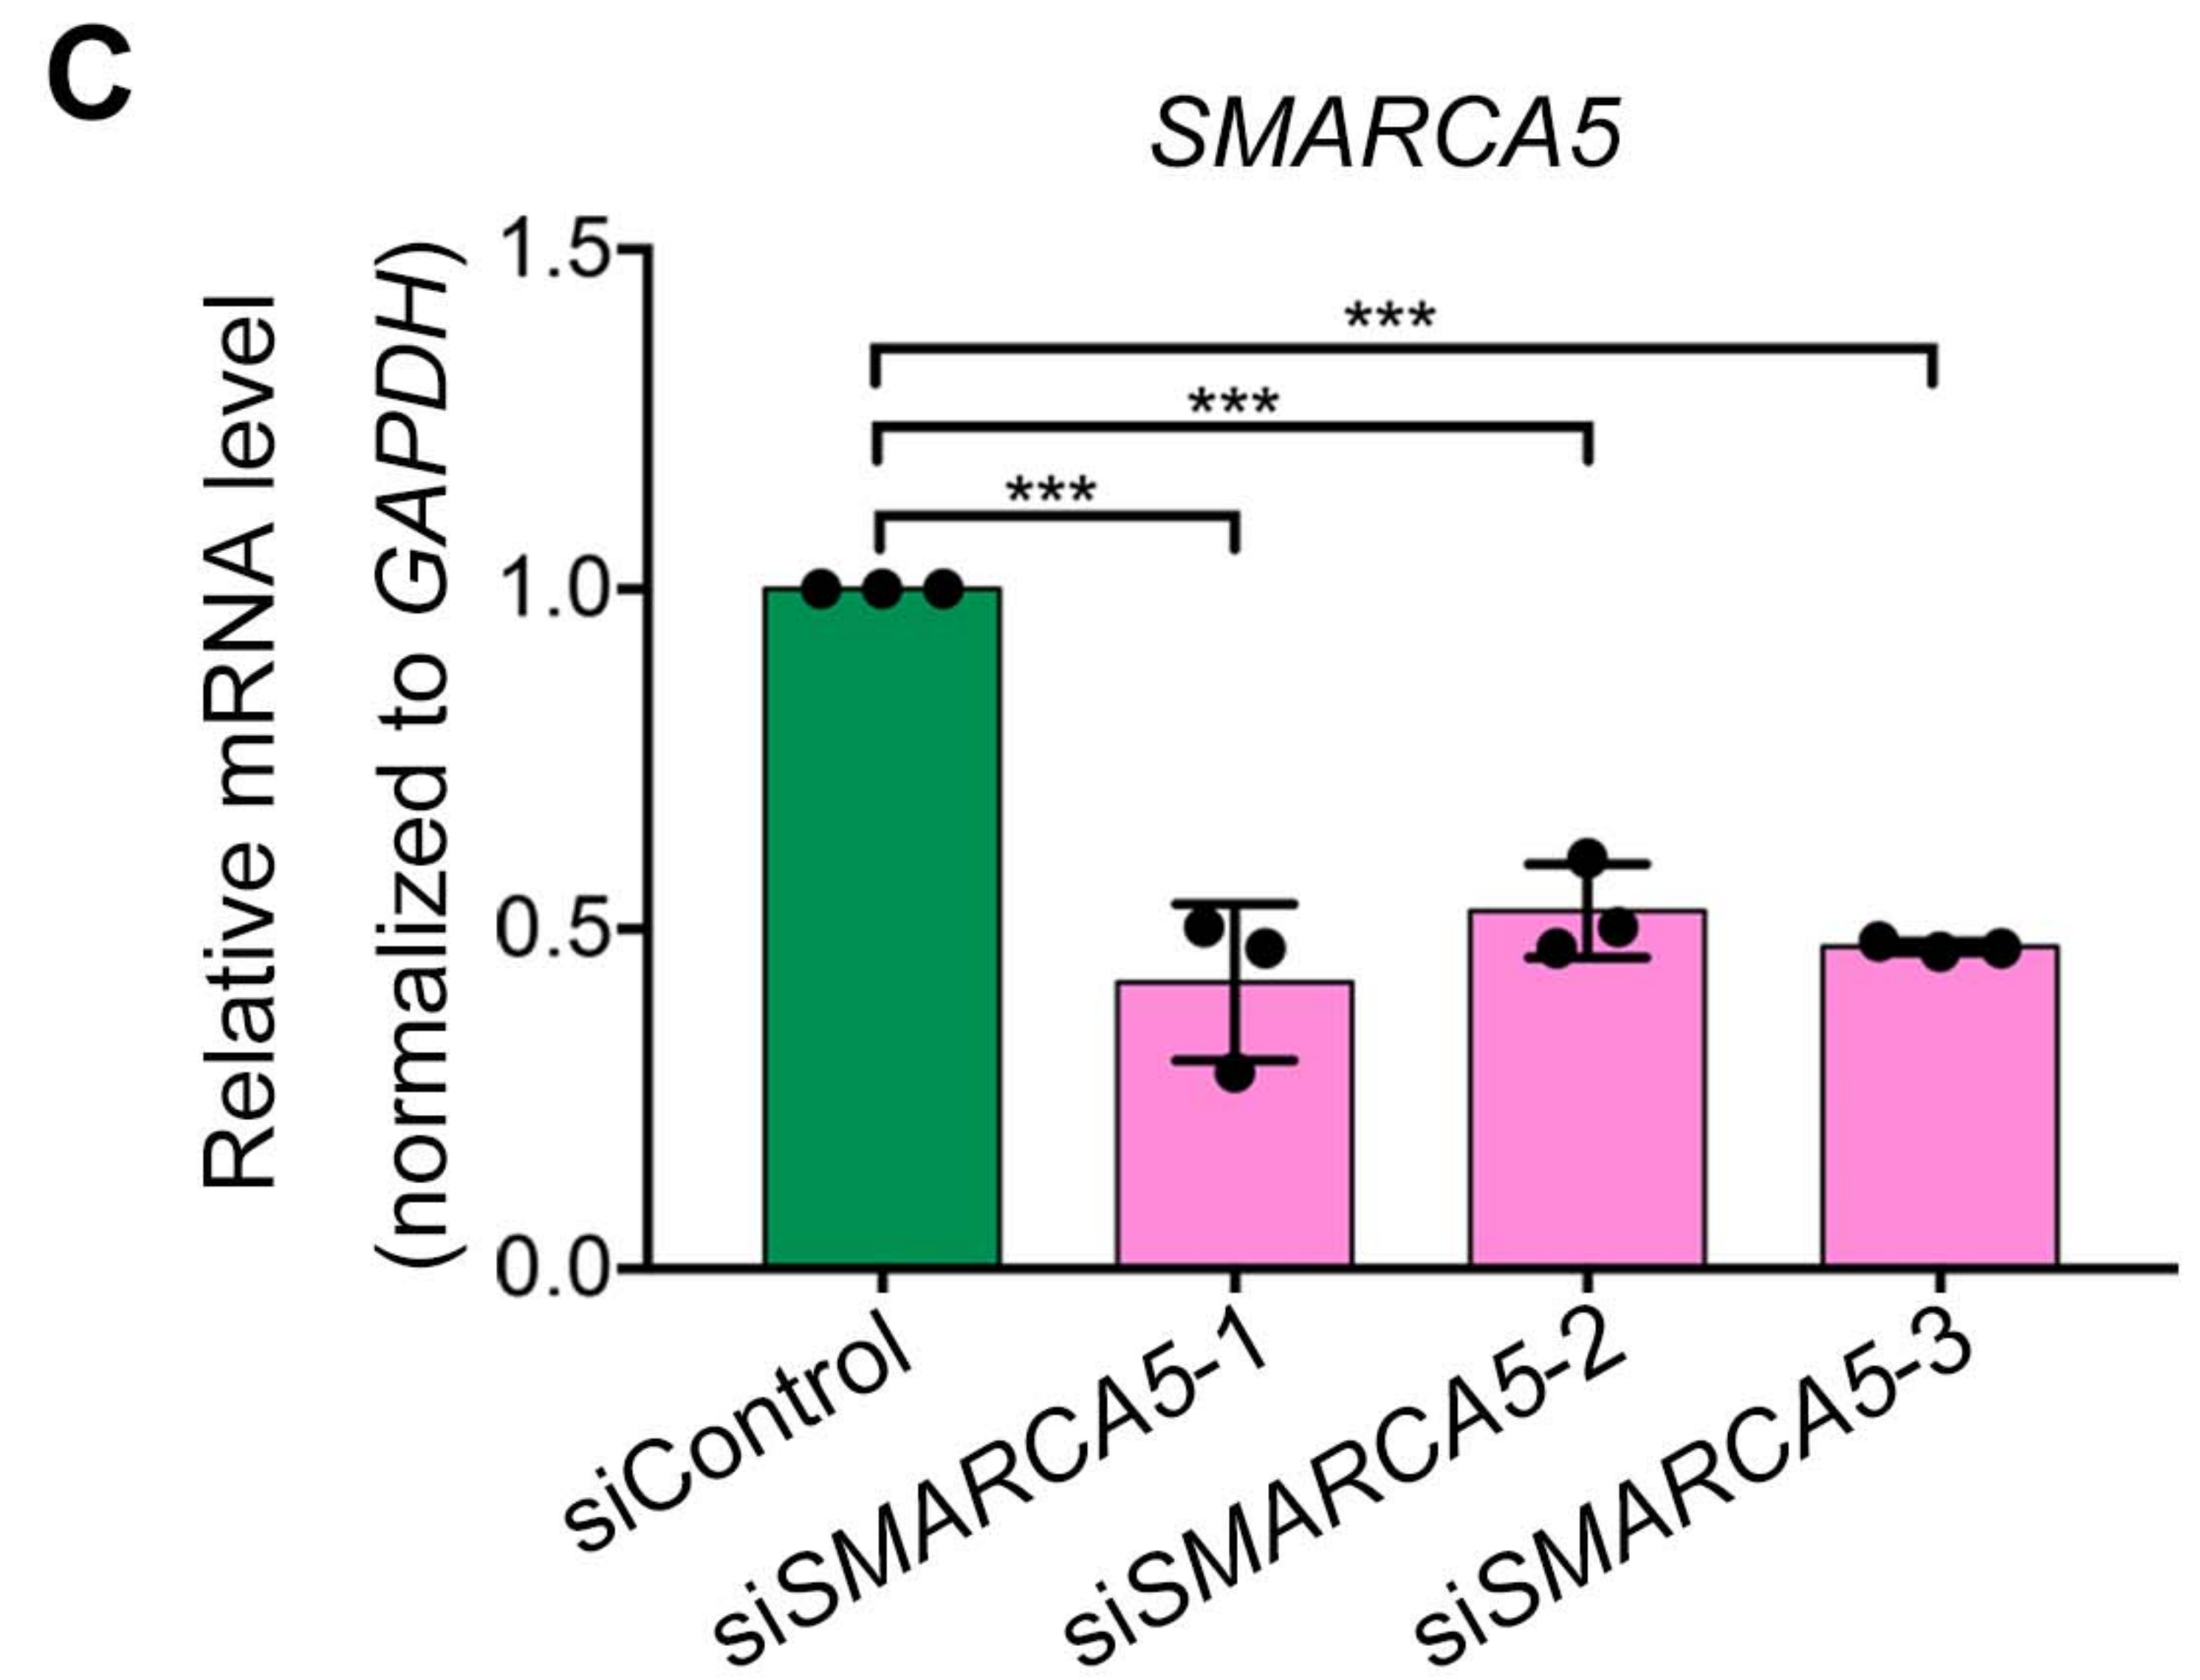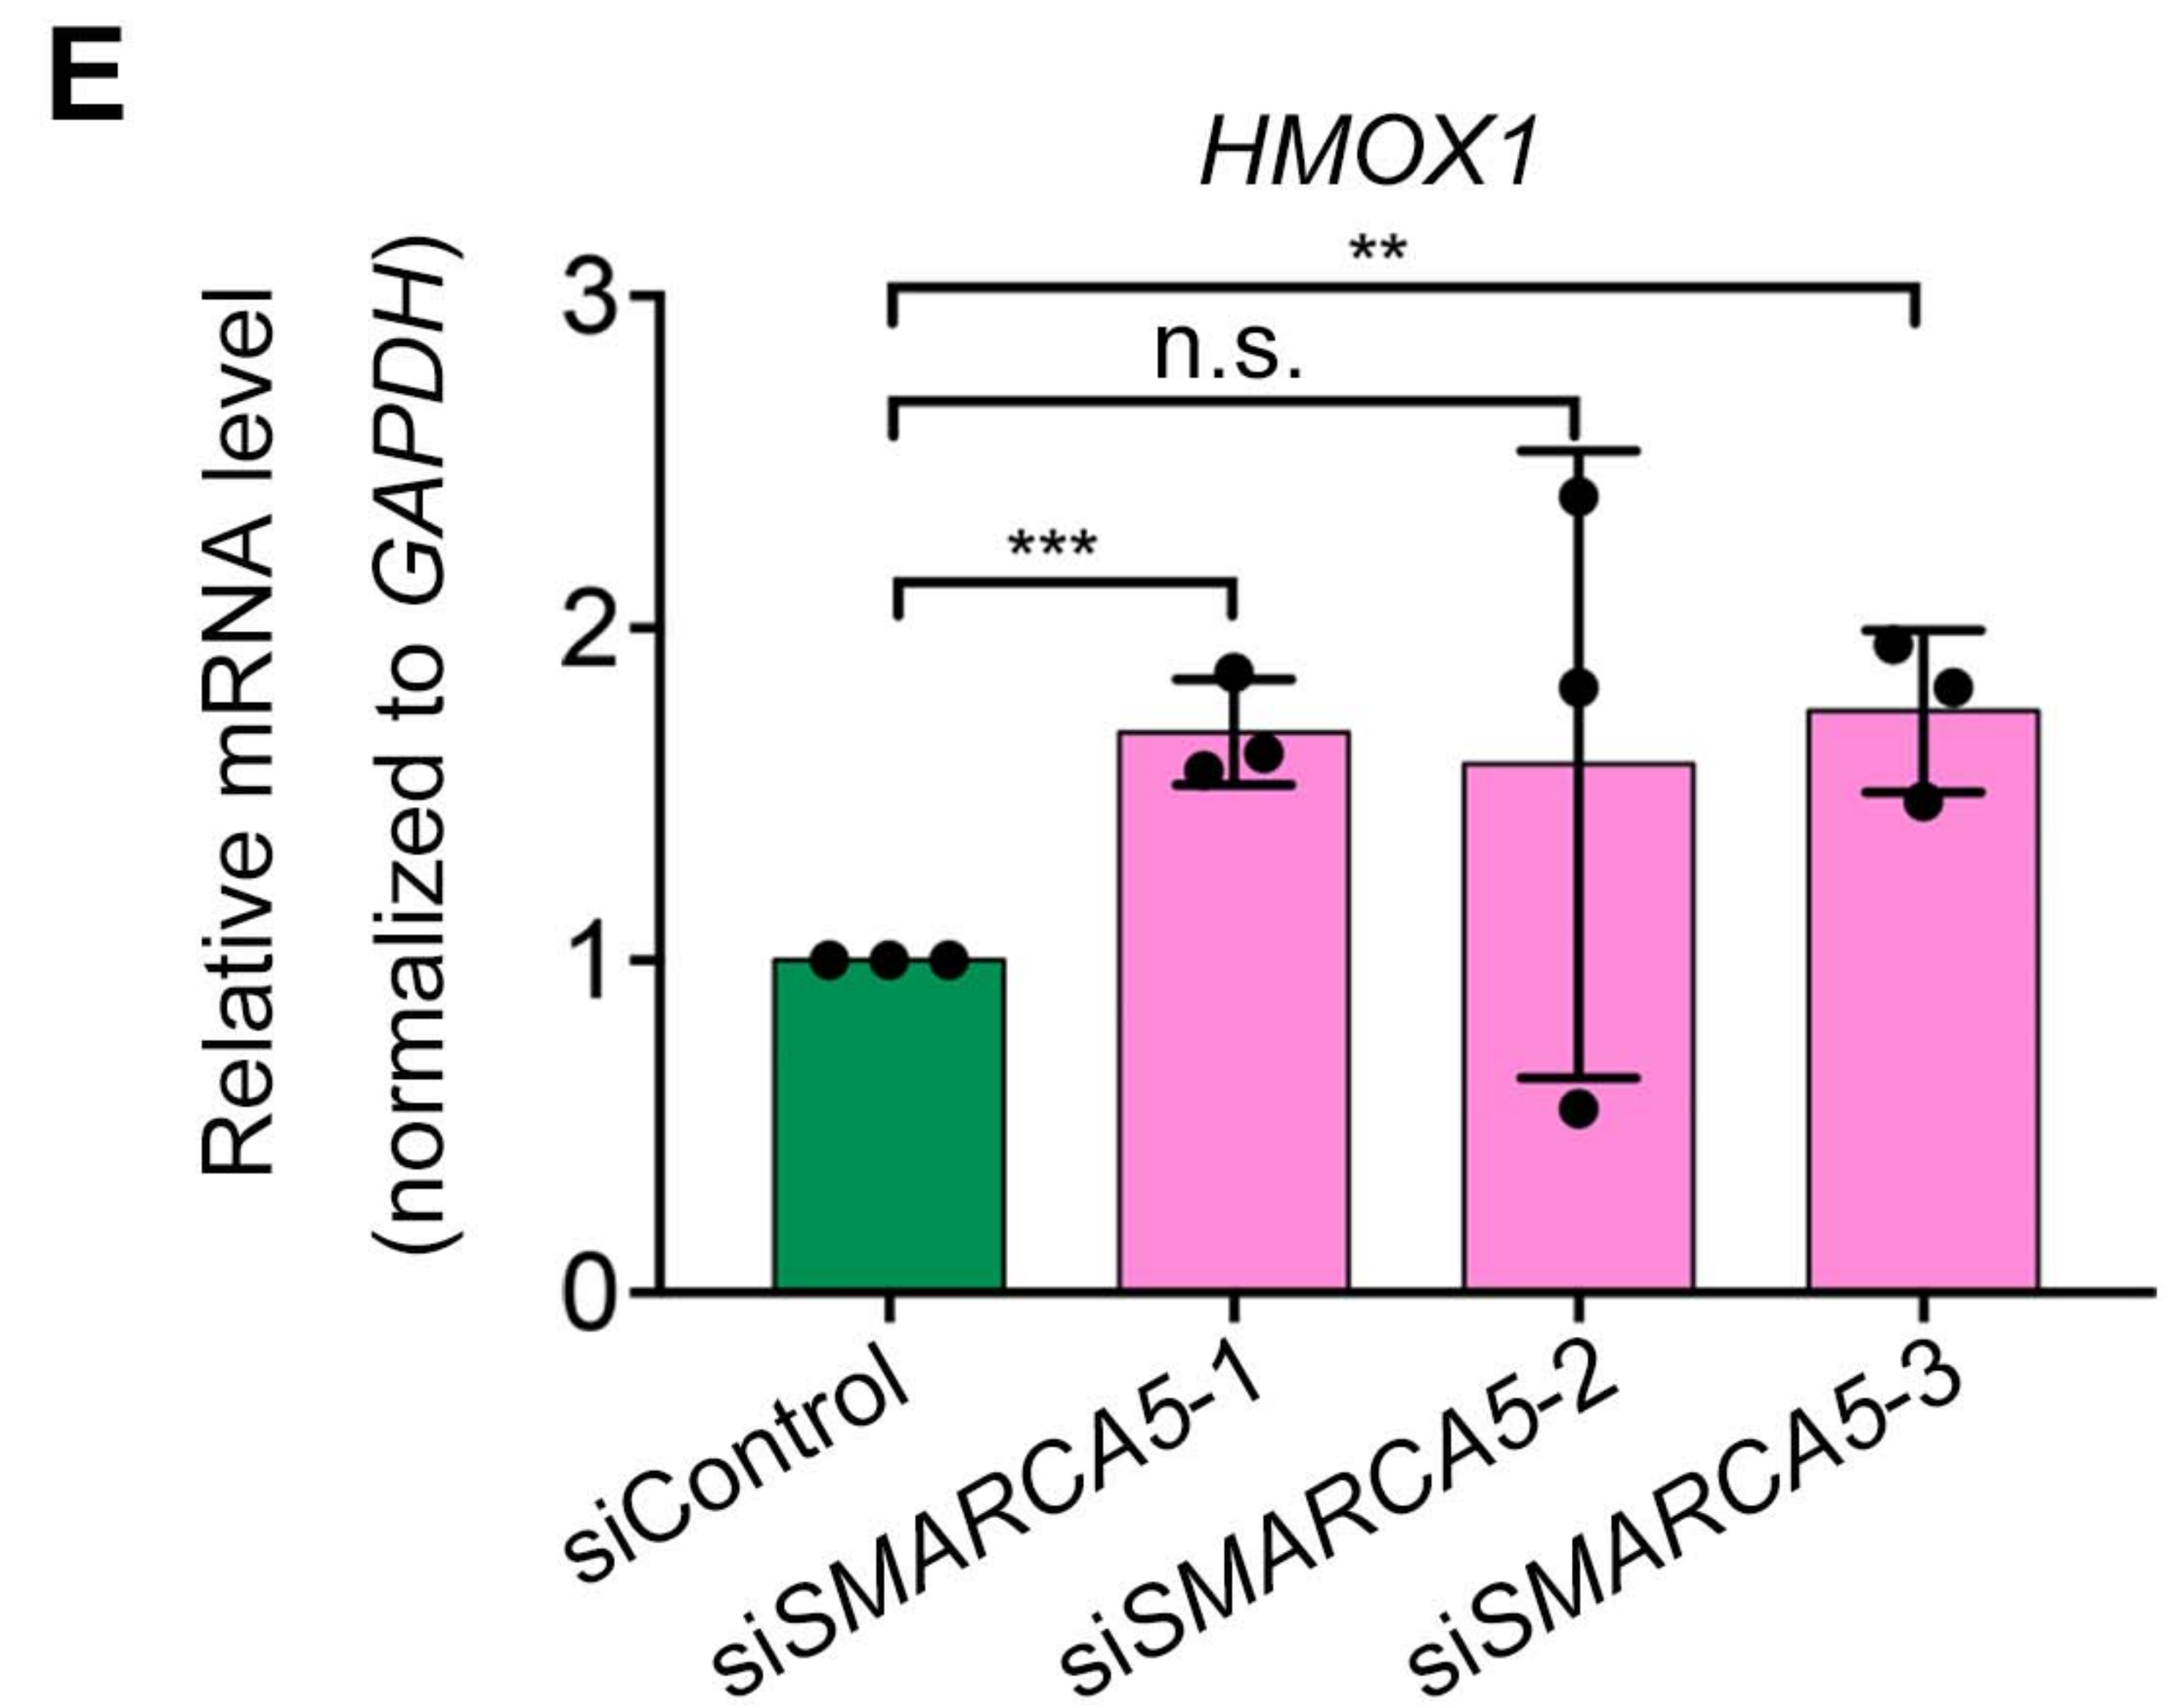

# Figure S7

## A

*smarca5* siblings

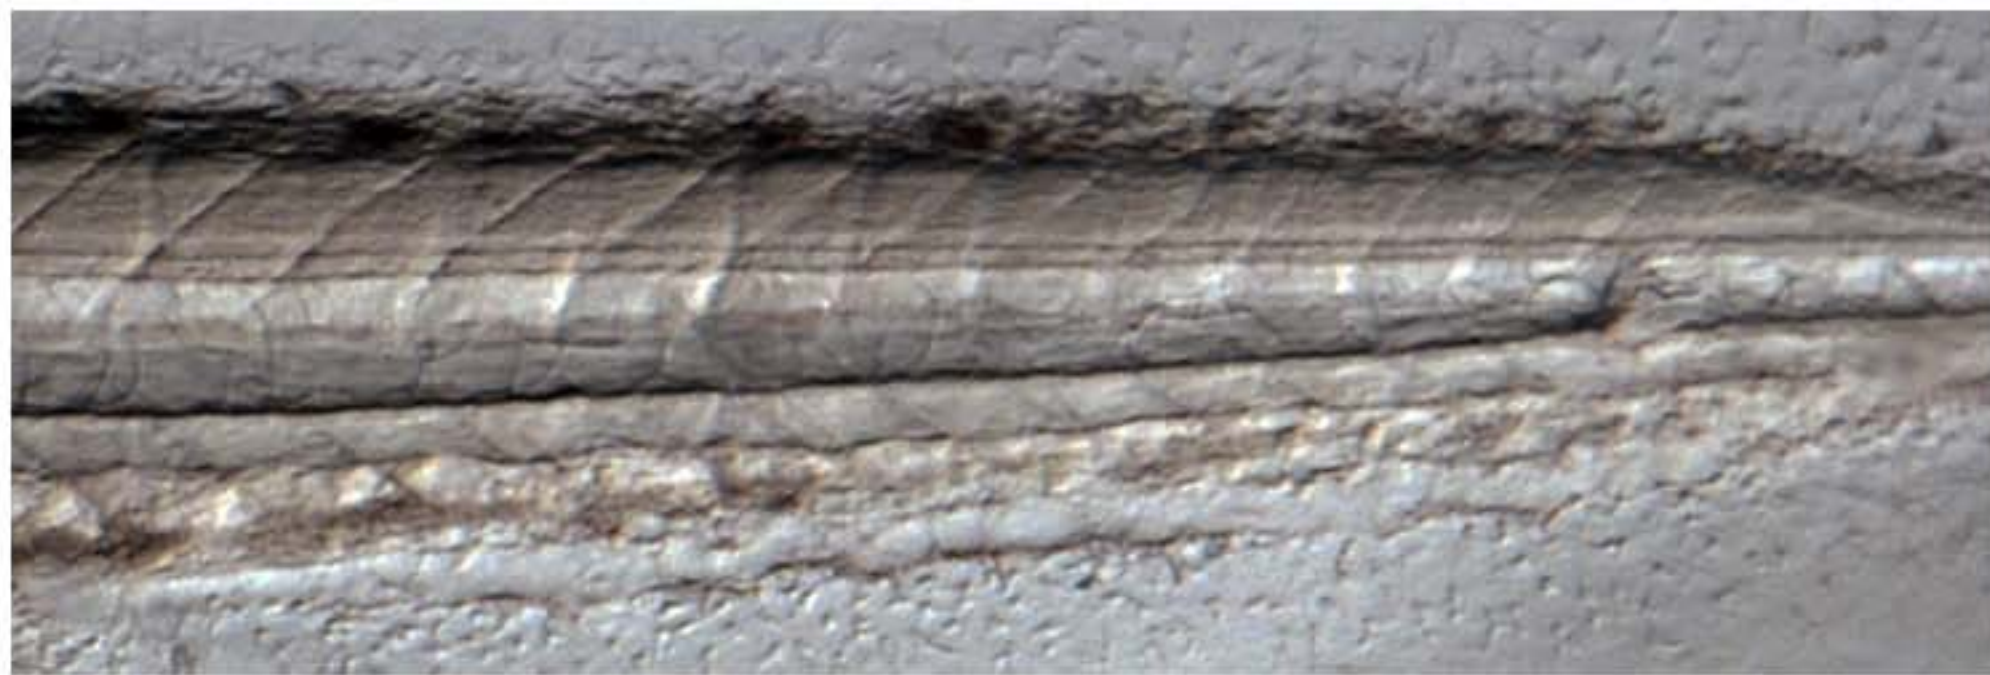

*smarca5* siblings+Glutathione 2 dpf

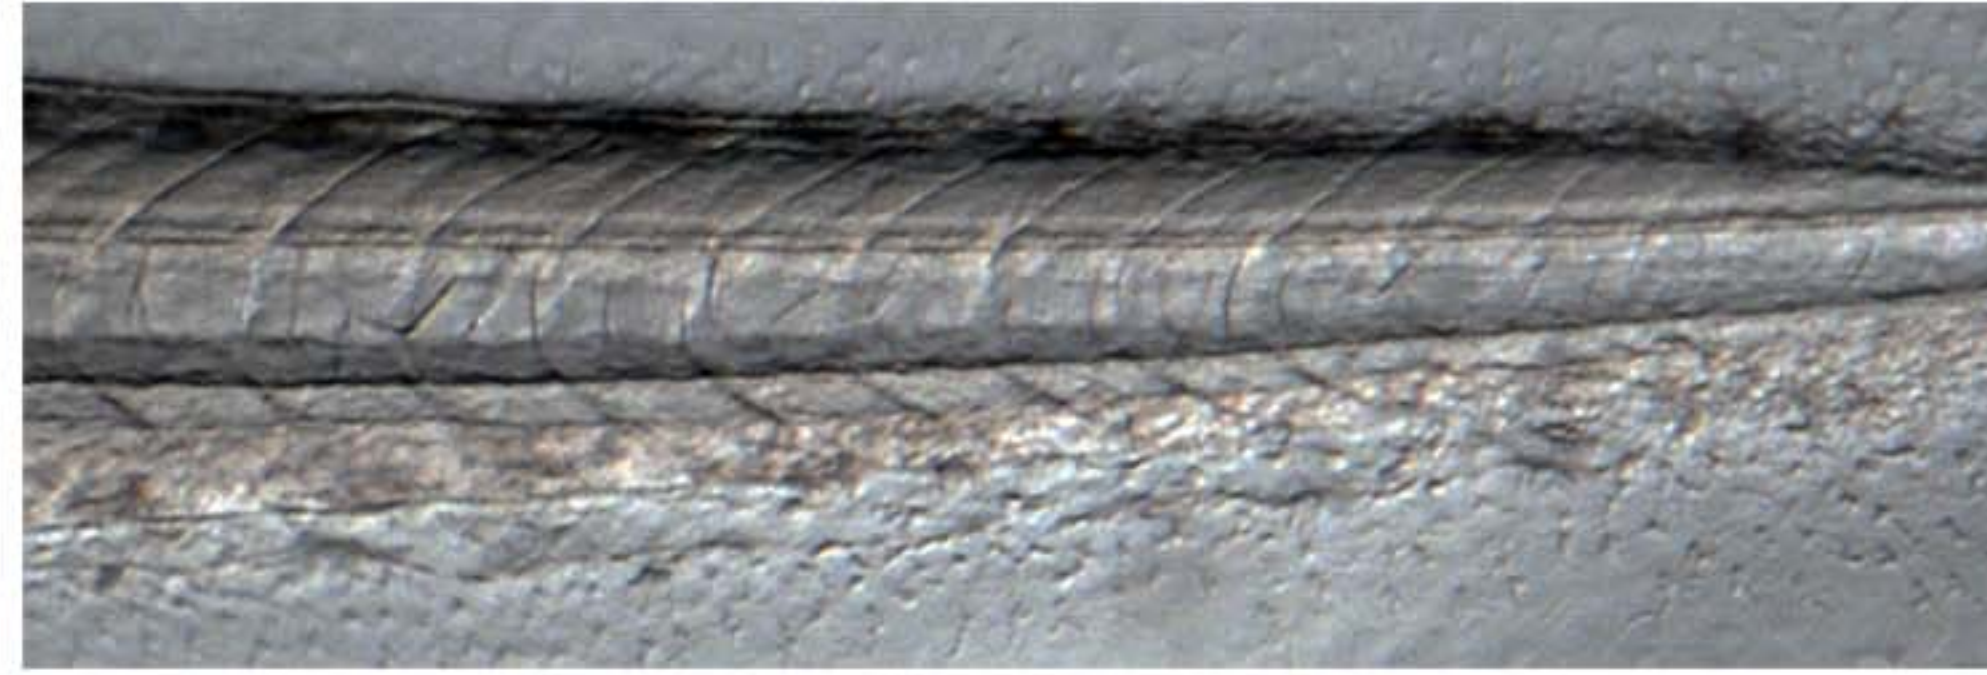

*smarca5*<sup>zko1049a</sup>

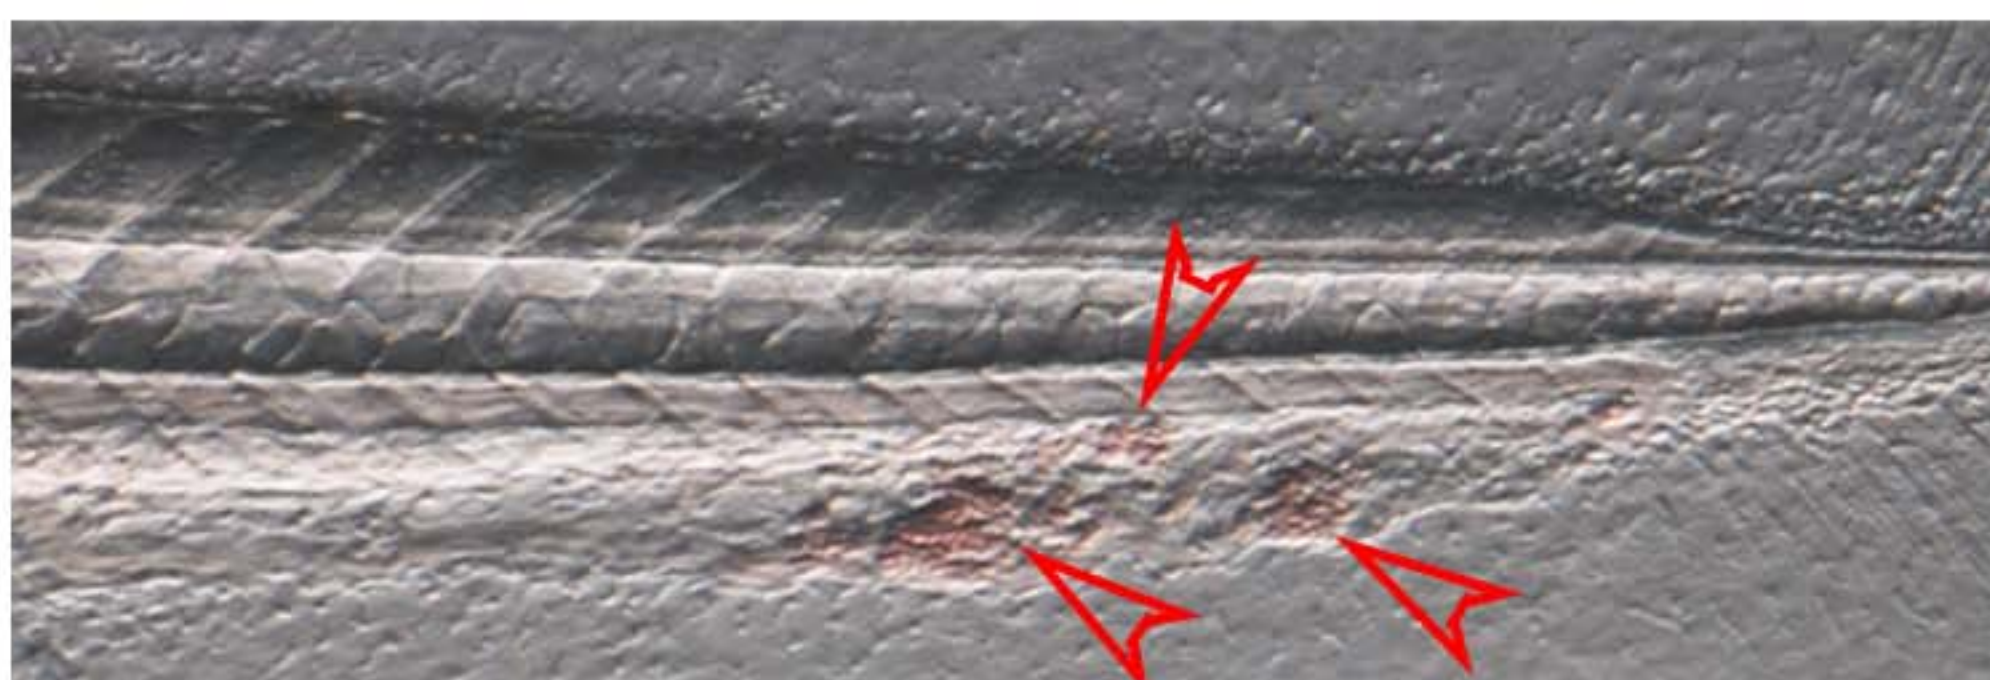

*smarca5*<sup>zko1049a</sup>+Glutathione

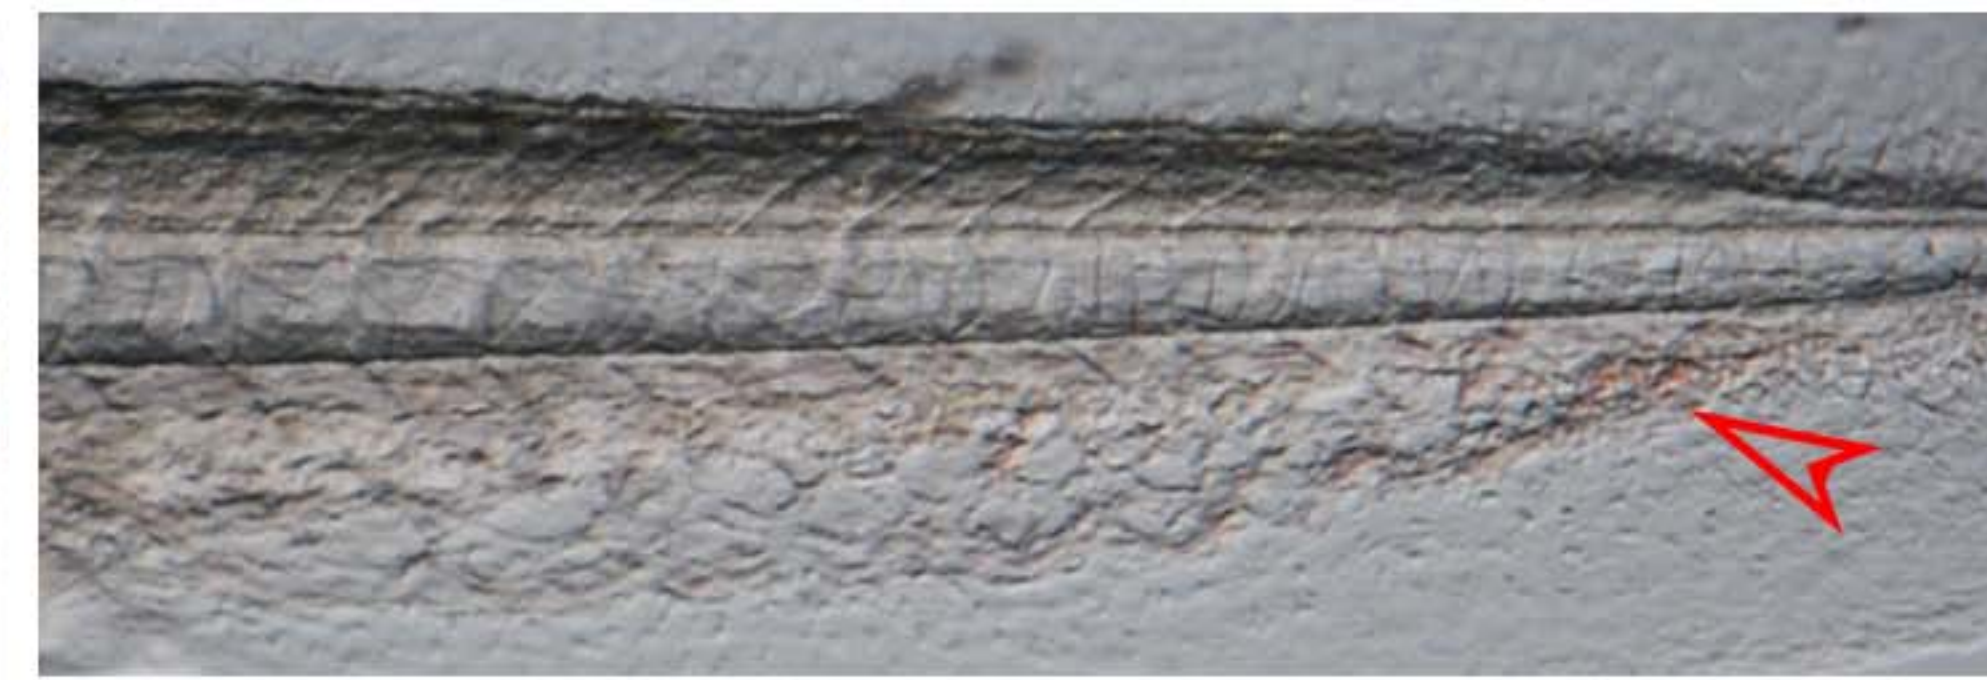

## B

bioRxiv preprint doi: <https://doi.org/10.1101/2021.09.08.459391>; this version posted September 9, 2021. The copyright holder for this preprint (which was not certified by peer review) is the author/funder, who has granted bioRxiv a license to display the preprint in perpetuity. It is made available under aCC-BY 4.0 International license.

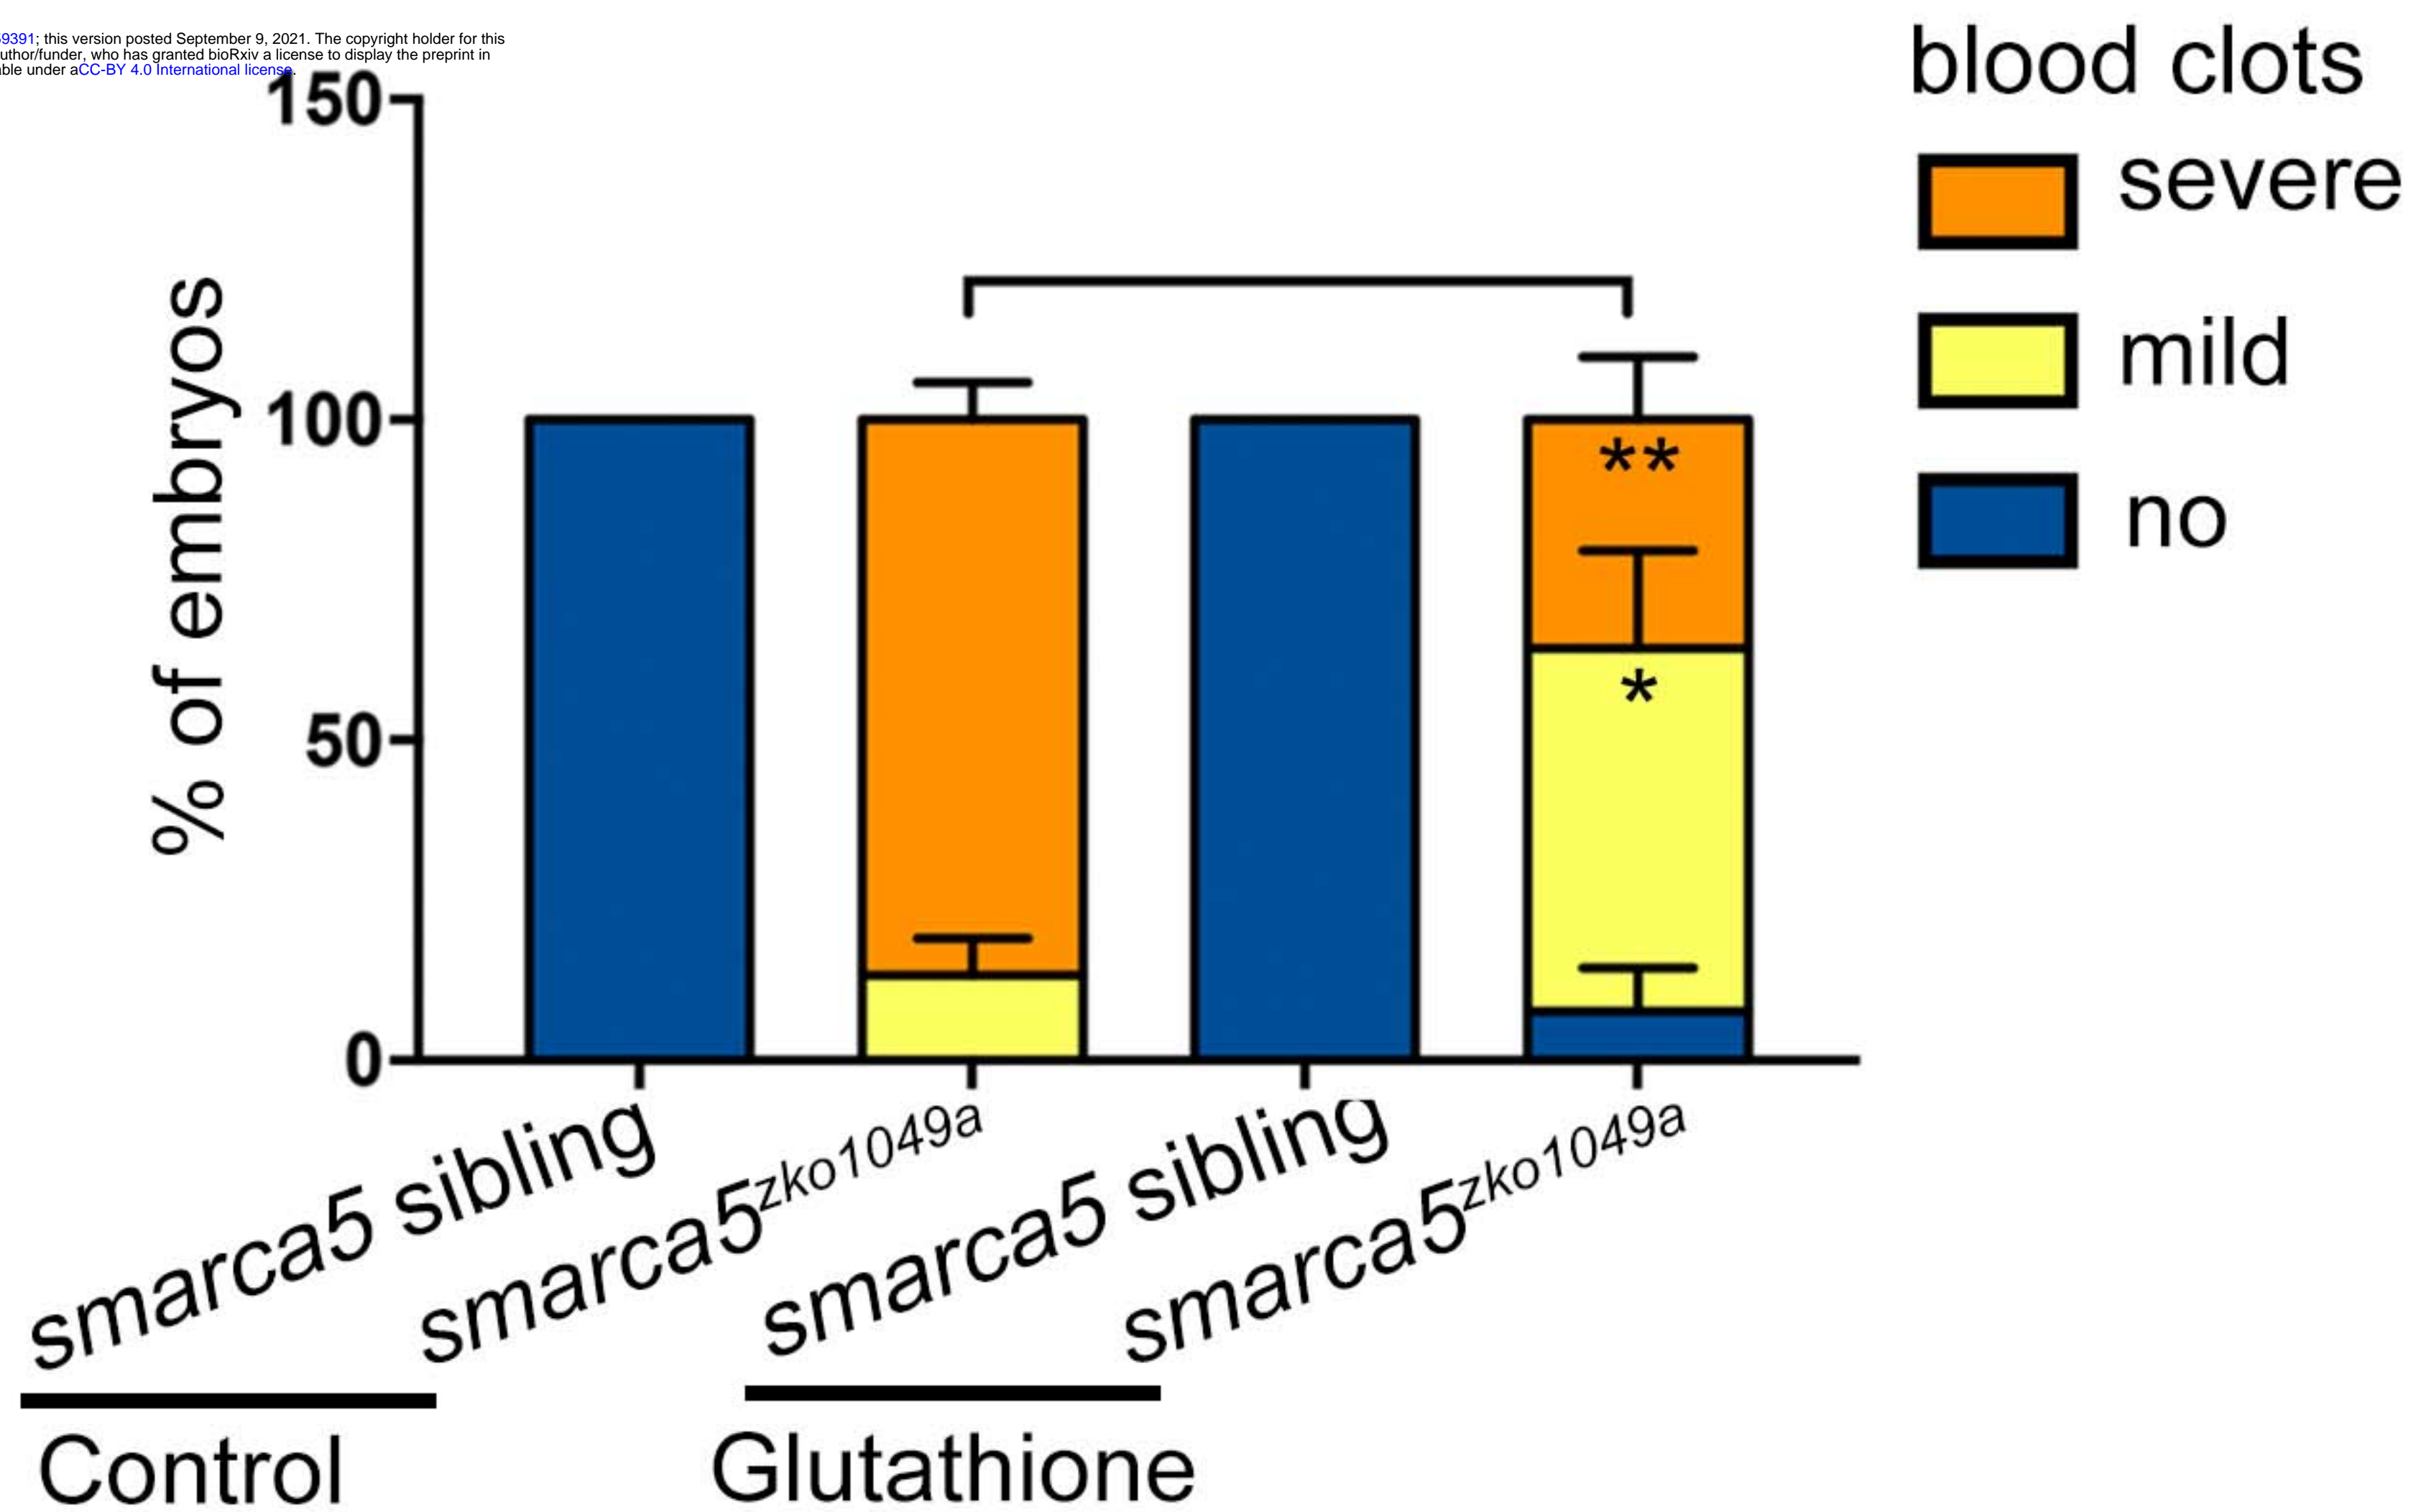

Source: https://biorxiv.org/content/10.1101/2021.09.08.459391v1.full.pdf
